# Supplementary material for: Stereocontrol in organic synthesis using silicon-containing compounds. Studies directed towards the synthesis of ebelactone AElectronic supplementary information (ESI) available: Experimental section. See http://www.rsc.org/suppdata/ob/b3/b316899a/
Source: Royal Society of Chemistry journal article supplement (doi:10.1039/b316899a), 2004-01-01
Supplement: b316899a.doc [file b316899a.doc]

Stereocontrol in organic synthesis using silicon-containing compounds. Studies directed towards the synthesis of ebelactone A

Sarah C. Archibald, David J. Barden, Jérôme F. Y. Bazin, Ian Fleming,* Colin F. Foster, Ajay K. Mandal, Amit K. Mandal, David Parker, Ken Takaki, Anne C. Ware, Anne R. B. Williams and Anna B. Zwicky

Department of Chemistry, Lensfield Road, Cambridge CB2 1EW, UK. Fax:+44 (0)1223 336362; Tel:+44 (0)1223 336372; E-mail: if10000@cam.ac.uk

# Supplementary data

**Experimental**

**General:**

Infrared spectra were recorded on a Perkin-Elmer 297 or FT-IR 1600 spectrophotometer and wavenumbers measured relative to polystyrene (1603 cm–1), using sodium chloride plates or sodium chloride solution cells (0.1 mm path length). NMR spectra were recorded on a Varian EM 360A or EM 390, a Bruker WP 80, AC 200, WM 250, AC 250, DPX 250, WM 400, AM 400, DRX 400, or DRX 500 (Cryoprobe) spectrometer. Proton chemical shifts were measured relative to tetramethylsilane (** 0.00) or chloroform (** 7.25) as internal standards. The coupling constant *J* is expressed in Hertz, with multiplicities presented in the same order as their respective coupling constants, which are in descending order, and rationalised only when there is no ambiguity. Less common abbreviations are qn (quintet) and sep (septet). 13C NMR spectra were recorded on a Bruker AM 400 (100 MHz). In 13C attached-proton test (APT) spectra, + denotes a signal in the same direction as the NMR solvent signal. 13C NMR signal assignments are included only when they have been established by HMQC correlations. Mass spectra were recorded on AE1 MS 30, AE1 MS 9, AEI MS 89, Kratos MS 50 or HP 5988A spectrometers. Optical rotations were measured with a Perkin-Elmer 241 digital polarimeter using a sodium lamp (589 nm) as the light source, the units of concentration are 10–2 g cm–3 and the path length 10 cm. Melting points were measured using a Kofler hot-stage apparatus and are uncorrected. Combustion analyses were performed on a Carlo Erba 1106 or Perkin-Elmer 240 automatic analyser and were carried out by the University Chemical Laboratory Micro Analysis Service. Column chromatography was carried out using Merck Kieselgel 60 (230-400 or 70-230 mesh ASTM). Thin layer chromatography (TLC) was performed on plates coated to a thickness of 0.5 or 1 mm with Kieselgel 60 PF254. Tetrahydrofuran (THF) and ether were freshly distilled from a mixture of lithium aluminium hydride and calcium hydride under argon. ‘Ether’ refers to diethyl ether. Dichloromethane, methanol, hexane, acetonitrile and toluene were freshly distilled from calcium hydride under argon. Other solvents, and reagents where appropriate, were purified before use according to standard procedures.78

**Methyl (*E*)-2-methylbut-2-enoate**

Tiglic acid (10.0 g, 0.1 mol) was refluxed for 3 h in methanol (250 cm3) containing a pinch of toluene-*p*-sulfonic acid. The methanol was evaporated off under reduced pressure to give methyl tiglate (11.4 g, 100%), which was used directly in the next step; **max(film)/cm–1 1735 (C=O) and 1630 (C=C); **H(250 MHz; CDCl3) 6.83 (1 H, qq, *J* 7.0 and 1.4, C=C*H*Me), 3.71 (3 H, s, CO2Me) and 1.82-1.75 (6 H, m, 2  Me).

**Methyl (2*RS*,3*RS*)-2-methyl-3-dimethyl(phenyl)silylbutanoate**

Methyl (*E*)-2-methylbut-2-enoate (1.67 g, 14.6 mmol) in THF (15 cm3) was added dropwise at –78 °C to lithium bis(dimethylphenylsilyl)cuprate79 [prepared from dimethyl(phenyl)silyllithium (0.5 mol dm–3 solution in THF, 62 cm3, 31 mmol) and copper(I) cyanide (1.39 g, 15.6 mmol) at –10 °C], and the mixture stirred for 5 h at this temperature. The mixture was brought to room temperature, quenched with saturated ammonium chloride solution (50 cm3) and filtered through Celite. The aqueous layer was extracted with dichloromethane (4  50 cm3). The combined organic layers were dried (Na2SO4), filtered, and concentrated under reduced pressure to give a crude oil. Chromatography (SiO2, hexane-EtOAc, 10:1) gave the ester1 (3.16 g, 86%) as a mixture of diastereoisomers (87:13); *R*f(hexane-EtOAc, 10:1) 0.7; **max(film)/cm–1 1735 (C=O), 1240 (SiMe) and 1110 (SiPh); **H(250 MHz; CDCl3) 7.54-7.46 (2 H, m, ArH), 7.36-7.25 (3 H, m, ArH), 3.57 (3 H, s, CO2Me), 2.52 (1 H, dq, *J* 5.7 and 6.9, C*H*MeCO2Me), 1.25 (1 H, dq, *J* 6.9 and 7.35, SiCH), 1.09 (3 H, d, *J* 6.9, *Me*CHCO2Me), 0.96 (3 H, d, *J* 7.5, *Me*CHSi), 0.31 (3 H, s, Si*Me*AMeB) and 0.29 (3 H, s, SiMeA*Me*B); *m*/*z* (EI) 250 (3%, *M*), 235 (7, *M* – Me), 219 (8, *M* – OMe), 135 (100, SiMe2Ph) and 75 (26, *M* – C3H5SiMe2Ph)(Found: M+, 250.1388. C14H22O2Si requires *M*, 250.1389). Although described in the main text in reference 1 as having been prepared by this recipe, its characterisation was inadvertently omitted from the experimental section of that paper.

**(2*RS*,3*RS*)-2-Methyl-3-dimethyl(phenyl)silylbutan-1-ol**

Lithium aluminium hydride (0.11 g, 3 mmol) was added in portions with stirring to methyl (2*RS*,3*RS*)-3-dimethyl(phenyl)silyl-2-methylbutanoate (0.375 g, 1.5 mmol) in ether (20 cm3), and the mixture was stirred overnight at room temperature. Water (2 cm3) was added, followed by ether (30 cm3), the aqueous layer was extracted with ether (3  40 cm3), the combined organic layers were dried (Na2SO4), and concentrated under reduced pressure, to give the *alcohol* (0.33 g, 100%); **max(film)/cm–1 3540-3400 (OH), 1280 (SiMe) and 1100 (SiPh); **H(250 MHz; CDCl3) 7.53-7.49 (2 H, m, ArH), 7.35-7.32 (3 H, m, ArH), 3.47 (1 H, dd, *J* 5.4 and 10.6, C*H*AHBOH), 3.33 (1 H, dd, *J* 7.5 and 10.6, CHA*H*BOH), 1.36 (1 H, br s, OH), 1.78 (1 H, m, MeC*H*), 0.96 (7 H, 2  d superimposed, 2  Me and CHSi), 0.32 (3 H, s, Si*Me*AMeB) and 0.29 (3 H, s, SiMeA*Me*B); *m*/*z* (EI) 207 (53%, M – Me) and 137 (100, MeCHCHMeCH2OH)(Found: M+ – Me, 207.1209. C13H22OSi requires *M* – Me, 207.1206).

**(2*RS*,3*RS*)-2-Methyl-3-dimethyl(phenyl)silylbutanal (±)-5**

**Method A.** Diisobutylaluminium hydride (1 mol dm–3 solution in hexane, 2.1 cm3, 2.1 mmol) was added dropwise to methyl (2*RS*,3*RS*)-3-dimethyl(phenyl)silyl-2-methylbutanoate (0.375 g, 1.5 mmol) in ether (10 cm3) under argon, at –98 °C (MeOH-liquid nitrogen bath), and kept for 20 min, when TLC (visualised with anisaldehyde) showed that the starting material had been consumed. Methanol (3 cm3) was added dropwise at –98 °C and the mixture was allowed to warm to room temperature. A saturated solution of potassium sodium tartrate (20 cm3) was added, followed by ether (30 cm3). The layers were filtered through Celite, separated, and the aqueous layer was extracted with ether (4  40 cm3). The combined organic layers were dried (Na2SO4), and concentrated under reduced pressure. The residue was chromatographed (SiO2, Et2O-hexane, 1:5) to give the *aldehyde* (0.25 g, 76%); *R*f(Et2O-hexane, 1:5) 0.41; **max(CCl4)/cm–1 2720 (aldehyde CH), 1730 (C=O), 1250 (SiMe2), 1115 (SiPh) and 700 (Ph); **H(250 MHz; CDCl3) 9.51 (1 H, d, *J* 2.2, CHO), 7.52-7.48 (2 H, m, ArH), 7.37-7.34 (3 H, m, ArH), 2.35 (1 H, m, MeC*H*CHO), 1.24 (1 H, m, MeC*H*Si), 1.04 (3 H, d, *J* 7.1, *Me*CHCHO), 1.00 (3 H, d, *J* 7.5, *Me*CHSi) and 0.33 (6 H, s, SiMe2); *m*/*z* (EI) 220 (3%, M), 219 (15, M – H), 205 (4, M – Me), 151 (22, *M* – C4H5O), 135 (100, SiMe2Ph) and 69 (34, *M* – PhMe2Si – Me)(Found: M+, 220.1284. C13H20OSi requires *M*, 220.1283).

**Method B.** Following Swern,80 DMSO (85 l, 1.19 mmol) in dichloromethane (0.5 cm3) was added slowly to a stirred solution of oxalyl chloride (53 l, 0.595 mmol) in dichloromethane (2 cm3) under argon at –78 °C. After 10 min, (3*RS*,4*RS*)-3-dimethyl(phenyl)silyl-2-methylbutan-1-ol (120 mg, 0.541 mmol) in dichloromethane (2 cm3) was added dropwise. After 45 min, distilled triethylamine (0.5 cm3) was added. The mixture was warmed to room temperature and water (1 cm3) was added. After 10 min, the two phases were separated and the aqueous layer extracted with dichloromethane (3  20 cm3). The combined organic layers were washed with dilute hydrochloric acid (2  10 cm3, 3 mol dm–3) and sodium bicarbonate solution (2  15 cm3), dried (Na2SO4) and evaporated under reduced pressure to give the aldehyde (127 mg, 97 %), identical (IR, 1H NMR, MS) with the other sample, which was used without further purification.

**(2*RS*,3*RS*,4*SR*,5*RS*)-3,5-Dimethyl-2-dimethyl(phenyl)silyloct-6-yn-4-ol (±)-6**

Freshly distilled titanium tetrachloride (0.47 cm3, 4.25 mmol) was added dropwise at –78 °C to the aldehyde (±)-**5** (0.852 g, 3.87 mmol) in dry dichloromethane (2 cm3) under argon, and the orange mixture stirred at this temperature for 10 min. (±)-2-Trimethylsilylpenta-2,3-diene (±)-**3**48 (0.610 g, 4.33 mmol) in dichloromethane (2 cm3) was added dropwise, and the now purple mixture was stirred at –78 °C for 1.5 h. The mixture was allowed to warm to room temperature overnight, and a saturated solution of sodium bicarbonate (10 cm3) was added. The emulsion was filtered through Celite (moistened with water), and the aqueous layer was extracted with dichloromethane (3  50 cm3). The combined organic layers were dried (Na2SO4), and concentrated under reduced pressure to give the crude product. The 250 MHz 1H NMR spectrum of the crude material showed the presence of three diastereoisomers (from integration in the 1H NMR spectrum of the alkynyl methyl signals) in a ratio of 8:2:1. Chromatography [SiO2, Et2O-light petroleum (bp 60-80 °C, 1:4] separated out the major, most polar, *alcohol* (0.55 g, 50%); *R*f[Et2O-light petroleum (bp 60-80 °C), 1:4] 0.22; **max(film)/cm–1 3500-3300 (OH), 1255 (SiMe) and 1120 (SiPh); **H(250 MHz; CDCl3) 7.54-7.48 (2 H, m, ArH), 7.39-7.31 (3 H, m, ArH), 3.44 (1 H, ddd, *J* 8.3, 5.4 and 3.2, C*H*OH), 2.43 (1 H, m, MeC*H*CC), 2.11 (1 H, m, MeC*H*), 1.74 (3 H, d, *J* 2.5, *Me*CC), 1.31 (1 H, d, *J* 5.4, OH), 1.13 (3 H, d, *J* 6.8, *Me*CH), 1.03 (3 H, apparent s, Me), 1.09 (1 H, m, SiCH), 0.88 (3 H, d, *J* 7.0, *Me*CH), 0.34 (3 H, s, Si*Me*AMeB) and 0.32 (3 H, s, SiMeA*Me*B); **C(63 MHz; CDCl3) 139.7, 133.9, 128.7, 127.7, 81.3, 77.2, 76.4, 37.5, 31.0, 24.3, 17.4, 13.4, 13.1, 3.4, –2.8 and –3.0; *m*/*z* (EI) 288 (2.4%, M+), 273 (72%, M – Me) and 135 (100, SiMe2Ph)(Found: C, 74.8; H, 9.97; M+, 288.1908. C18H28OSi requires C, 74.9; H, 9.78; *M*, 288.1909).

**(2*SR*,3*SR*,4*SR*,5*RS*)-3,5-Dimethyloct-6-yn-2,4-diol (±)-7**

The boron trifluoride-acetic acid complex (0.5 cm3, 4.0 mmol) was added dropwise to 3,5-dimethyl-2-dimethyl(phenyl)silyloct-6-yn-4-ol (0.141 g, 0.489 mmol) in dichloromethane (3 cm3) at 0 °C under argon, and the mixture was stirred for 1 h until the starting material {*R*f[EtOAc-light petroleum (bp 60-80 °C), 1:4] 0.40} had been consumed. Sodium bicarbonate solution (10 cm3) was added dropwise and after 0.5 h of stirring at room temperature, the mixture was extracted with ether (3  20 cm3), the combined organic layers were dried (Na2SO4), and concentrated under reduced pressure to give a semi-solid residue; **H(90 MHz; CDCl3) 3.65 (1 H, m, C*H*OH), 2.55 (1 H, m, MeC*H*CC), 1.85 (3 H, d, *J* 1.5, MeCC), 1.65-0.75 (10 H, m, 3  Me and CHSi), 0.42 (3 H, s, Si*Me*AMeB) and 0.31 (3 H, s, SiMeA*Me*B) showed the disappearance of the phenyl group. The crude product in DMF (5 cm3) was stirred with potassium fluoride (0.05 g, 0.978 mmol) and MCPBA (0.25 g, 1.46 mmol) overnight at room temperature. Saturated sodium thiosulfate solution (10 cm3) and dichloromethane (20 cm3) were added. The organic layer was washed successively with saturated sodium bicarbonate solution (20 cm3) and brine (20 cm3), dried (Na2SO4), and concentrated under reduced pressure. The residue was chromatographed [PLC, Et2O-light petroleum (bp 60-80 °C), 1:1] to give the diol (35 mg, 42%) as prisms, mp 122-124 °C; *R*f[Et2O-light petroleum (bp 60-80 °C), 1:1] 0.22; **max(Nujol)/cm–1 3400-3250 (OH); **H(250 MHz; CDCl3) 4.10 (1 H, dq, *J* 2.05 and 6.4, MeC*H*OH), 3.60 (1 H, dd, *J* 1.7 and 9.5, C*H*OH), 2.48 [1 H, m, CH(OH)C*H*MeCHMe(OH)], 1.98 (1 H, qt, *J* 7.1 and 1.9, MeC*H*CC), 1.76 (3 H, d, *J* 2.1, *Me*CC), 1.74-1.28 (2 H, br, OH), 1.22 (6 H, d, *J* 6.6, 2  Me) and 0.92 (3 H, d, *J* 7.01, *Me*CHOH); *m*/*z* (EI) 103 (100%, M – C5H7), 97 (28, *M* – MeC=CCHMeCHOH) and 67 (97, *M* – CHOHCHMeCHMeOH)(Found: C, 70.3; H, 10.38; M+ – C5H7, 103.0759. C10H18O2 requires C, 70.5; H, 10.65%; *M* – C5H7, 103.0759).

**(2*RS*,3*RS*)-2,4-Dimethyl-3-dimethyl(phenyl)silylpentan-1-ol**

Methyl (2*RS*,3*RS*)-2,4-dimethyl-3-dimethyl(phenyl)silylpentanoate1 (10.55 g, 0.038 mol, a 95:5 mixture with the 2*SR*,3*RS*-isomer) in ether (100 cm3) was added slowly by cannula to a stirred suspension of lithium aluminium hydride (3.19 g, 0.076 mol) in ether (150 cm3) under argon at room temperature. After 1 h, water was added slowly followed by hydrochloric acid solution (3 mol dm–3), and the aqueous layer was extracted with ether (3  300 cm3). The combined organic layers were dried (Na2SO4) and evaporated under reduced pressure. Chromatography (SiO2, EtOAc-hexane, 1:9 to 4:1) gave the *alcohol* (9.0 g, 95%); *R*f(EtOAc-hexane, 1:5) 0.24; **max(CCl4)/cm–1 3700-3300 (OH), 1250 (SiMe2), 1110 (SiPh) and 1030 (C–O); **H(250 MHz; CDCl3) 7.57-7.53 (2 H, m, ArH), 7.37-7.33 (3 H, m, ArH), 3.34 (1 H, dd, *J* 10.3 and 6.8, C*H*AHBOH), 3.27 (1 H, dd, *J* 10.3 and 7.8, CHA*H*BOH), 2.1-1.9 (2 H, m, C*H*Me and C*H*Me2), 1.6 (1 H, br s, OH), 1.04 (3 H, d, *J* 7.0, CH*Me*), 1.03 (1 H, m, CHSi), 0.96 (3 H, d, *J* 6.8, CH*Me*AMeB), 0.94 (3 H, d, *J* 6.9, CHMeA*Me*B), 0.41 (3 H, s, Si*Me*AMeB) and 0.40 (3 H, s, SiMeA*Me*B); **C(100 MHz; CDCl3) 140.8, 133.8, 128.7, 127.7, 68.5, 35.8, 35.0, 28.0, 24.1, 17.9, 15.3, –0.2 and –0.6; *m*/*z* (EI) 235 (24.5%, M+ – Me), 173 (62, M – Ph) and 135 (100, PhMe2Si)(Found: M+ – Me, 235.1503. C15H26OSi requires *M* – Me, 235.1518).

**(2*RS*,3*RS*)-2,4-Dimethyl-3-dimethyl(phenyl)silylpentanal (±)-8**

Using the same recipe as that used for the Swern oxidation giving the aldehyde (±)-**5**, (2*RS*,3*RS*)-2,4-dimethyl-3-dimethyl(phenyl)silylpentan-1-ol (1.25 g, 5 mmol) gave the *aldehyde* (1.17 g, 94 %), which was used without further purification; *R*f(EtOAc-hexane, 1:10) 0.33; **max(CCl4)/cm–1 2720 (aldehyde CH), 1730 (C=O), 1250 (SiMe), 1110 (SiPh) and 700 (Ph); **H(250 MHz; CDCl3) 9.58 (1 H, s, CHO), 7.54-7.51 (2 H, m, ArH), 7.36-7.33 (3 H, m, ArH), 2.58 (1 H, dq, *J* 4.0 and 7.1, C*H*MeCHO), 2.00 (1 H, oct, *J* 6.5, C*H*Me2), 1.52 (1 H, dd, *J* 4.0 and 5.2, CHSi), 1.17 (3 H, d, *J* 7.1, CH*Me*CHO), 0.94 (3 H, d, *J* 6.8, CH*Me*AMeB), 0.93 (3 H, d, *J* 6.8, CHMeA*Me*B), 0.39 (3 H, s, Si*Me*AMeB) and 0.30 (3 H, s, SiMeA*Me*B); **C(100 MHz; CDCl3) 205.6, 139.5, 133.8, 128.9, 127.8, 46.3, 34.7, 28.0, 24.0, 22.0, 13.7, –0.6 and –1.2; *m*/*z* (EI) 233 (2%, *M*+ – Me) and 135 (100, PhMe2Si+)(Found: M+ – Me, 233.1363. C15H24OSi requires *M* – Me, 233.1362). Signals in the 1H NMR spectrum showed the presence of the other diastereoisomer: ** 9.65 (1 H, s, CHO), 2.85 (1 H, m, C*H*MeCHO), 1.9 (1 H, m, C*H*Me2) and doublets at ** 1.11, 1.04 and 0.83.

**Reaction of (2*RS*,3*RS*)-2,4-Dimethyl-3-dimethyl(phenyl)silylpentanal (±)-8 with titanium tetrachloride**

Titanium tetrachloride (303 l, 2.76 mmol) was added to a solution of the aldehyde (622 mg, 2.51 mmol) in dichloromethane (10 cm3) under argon at –78 °C, with or without the allenylsilane (±)-**3**, and the mixture was stirred at –78 °C for 1 h. The orange solution was poured into saturated sodium bicarbonate solution and extracted with dichloromethane. The extracts were washed with sodium bicarbonate solution, dried (Na2SO4) and evaporated under reduced pressure. Chromatography of a portion of the total crude reaction mixture (SiO2, EtOAc-hexane, 0:1 to 1:25) gave 2,4-dimethyl-1-phenylpent-2-ene **11**;81 *R*f(hexane) 0.45; **max(CCl4)/cm–1 1600 and 1495 (aromatic C=C) and 700 (Ph); **H(250 MHz; CDCl3) 7.31-7.24 (5 H, m, ArH), 5.10 (1 H, dq, *J* 9.1 and 1.3), 3.24 (2 H, br s, PhC*H*2), 2.51 (1 H, dsep, *J* 9.1 and 6.6, Me2C*H*), 1.52 (3 H, d, *J* 1.4, CH=C*Me*) and 0.96 (6 H, d, *J* 6.6, *Me*2CH), and (3RS,4RS,5SR)-3-*isopropyl*-2,2,4-*trimethyl*-5-*phenyl*-1,2-*oxasilolane* (±)-**10**; *R*f(EtOAc-hexane, 1:25) 0.30; **max(CCl4)/cm–1 1600 and 1495 (aromatic C=C), 1255 (SiMe2), 1060 (SiO), 865 (SiMe2) and 700 (Ph); **H(250 MHz; CDCl3) 7.36-7.18 (5 H, m, Ph), 5.00 (1 H, s, PhC*H*), 2.43 (1 H, qn, *J* 7.0, C*H*MeCHSi), 1.78 (1 H, dsep, *J* 11.4 and 6.7, C*H*Me2), 1.21 (3 H, d, *J* 7.2, CHOCH*Me*), 0.85 (6 H, d, *J* 6.7, CH*Me*2), 0.76 (1 H, dd, *J* 6.6 and 11.4, CHSi), 0.33 (3 H, s, Si*Me*AMeB) and 0.32 (3 H, s, SiMeA*Me*B); *m*/*z* (EI) 248 (21%, M+), 233 (5, M – Me), 91 (20, C7H7), 75 (25, Me2Si=OH) and 69 (10, C5H9)(Found: M+, 248.1577. C15H24OSi requires *M*, 248.1596). Preparative TLC (alumina, hexane) of the crude mixture gave impure 2-*chloro*-2,4-*dimethyl*-1-*phenylpentane* **12**; *R*f(hexane) 0.50; **max(CCl4)/cm–1 1602 and 1495 (aromatic C=C) and 700 (Ph); **H(250 MHz; CDCl3) 7.30-7.20 (5 H, m, Ph), 3.12 (1 H, d, *J* 13.7, PhC*H*AHB), 3.00 (1 H, d, *J* 13.7, PhCHA*H*B), 2.01-1.92 (1 H, m, C*H*Me2), 1.76 (1 H, dd, *J* 14.6 and 5.0, Me2CHC*H*AHB), 1.66 (1 H, dd, *J* 14.6 and 5.4, Me2CHCHA*H*B), 1.48 (3 H, s, *Me*CCl), 1.01 (3 H, d, *J* 6.4, CH*Me*AMeB) and 0.99 (3 H, d, *J* 6.4, CHMeA*Me*B); *m*/*z* 210 (44.6%, M+)(Found: M+, 210.1183. C13H1935Cl requires *M*, 210.1176). The yields of the three components, determined from the 1H NMR spectrum of the crude mixture adding a known amount of triphenylmethane, were: **10** **(**34%), **11** **(**21%) and **12** (13%). The proportions of the three identifiable products were sensitive to the conditions and time of reaction; allowing the reaction mixture to warm to room temperature, for example, gave predominantly 2-chloro-2,4-dimethyl-1-phenylpentane **12**.

**(1*RS*,2*RS*,3*RS*)- (±)-13 and (1*RS*,2*SR*,3*SR*)-2,4-Dimethyl-3-dimethyl(phenyl)silyl-1-phenylpentan-1-ol (±)-14**

Phenylmagnesium bromide (1.25 cm3 of a 3 mol dm–3 solution in ether, 3.76 mmol) was added slowly with stirring to the aldehyde (±)-**8** (466 mg, 1.88 mmol) in ether (10 cm3) under argon at 0 °C, and the mixture kept for 1 h. Saturated ammonium chloride solution (10 cm3) was added, and the mixture extracted with ether (3  30 cm3). The extracts were combined and washed with ammonium chloride solution (2  15 cm3) and brine (2 15 cm3), dried (Na2SO4) and evaporated under reduced pressure. Chromatography (SiO2, EtOAc-hexane, 1:7) gave the anti-Cram product **14** (122 mg, 19%); *R*f(EtOAc-hexane, 1:7) 0.35; **max(CCl4)/cm–1 3760 (OH), 1490 (aromatic C=C), 1250 (SiMe2), 1110 (SiPh) and 700 (Ph); **H(250 MHz; CDCl3) 7.50-7.23 (10 H, m, 2  Ph), 4.34 (1 H, d, *J* 8.7, PhC*H*OH), 2.17 (1 H, dqd, *J* 8.7, 6.9 and 2.0, CHOHC*H*Me), 1.88 (1 H, sepd, *J* 6.9 and 3.0, Me2C*H*), 1.22 (3 H, d, *J* 6.9, CHOHCH*Me*CHSi), 0.82 (4 H, d, *J* 7.0, CH*Me*AMeB and CHSi underneath), 0.51 (3 H, d, *J* 6.8, CHMeA*Me*B), 0.40 (3 H, s, Si*Me*AMeB) and 0.36 (3 H, s, SiMeA*Me*B); *m*/*z* (EI) 248 (2%, M+ – Ph), 219 [29, Me2CHCH(PhMe2Si)CHMe], 135 (100, PhMe2Si) and 69 (43, C5H9)(Found: M+ – Ph, 248.1589. C21H30OSi requires *M* – Ph, 248.1597), and the Cram product **13** (398 mg, 61%); *R*f(EtOAc-hexane, 1:7) 0.25; **max(CCl4)/cm–1 3630 (OH), 1495 (aromatic C=C), 1250 (SiMe2), 1110 (SiPh) and 705 (Ph); **H(250 MHz; CDCl3) 7.79-7.06 (10 H, m, 2  Ph), 3.95 (1 H, d, *J* 9.8, PhC*H*OH), 2.15-2.02 (2 H, m, C*H*Me2 and CHOHC*H*Me), 1.69 (1 H, dd, *J* 3.9 and 1.0, CHSi), 1.59 (1 H, br s, OH), 1.01 (3 H, d, *J* 6.7, CHOHCH*Me*), 0.94 (3 H, d, *J* 6.9, CH*Me*AMeB), 0.69 (3 H, d, *J* 7.1, CHMeA*Me*B), 0.46 (3 H, s, Si*MeA*MeB) and 0.42 (3 H, s, SiMeA*Me*B); *m*/*z* (EI) 248 (2.7%, M+ – Ph), 219 [10, Me2CHCH(PhMe2Si)CHMe], 135 (100, PhMe2Si) and 69 (98, C5H9)(Found: M+ – Ph, 248.1603. C21H30OSi requires *M* – Ph, 248.1597). In the crude product, a ratio of 76:24 was determined by integration of the PhC*H*OH signals at ** 4.34 and ** 3.95.

**(3*RS*,4*RS*,5*RS*)-3-Isopropyl-2,2,4-trimethyl-5-phenyl-1,2-oxasilolane (±)-15**

The Cram alcohol **13** (130 mg, 0.4 mmol) in dry THF (3 cm3) was added dropwise to a stirred suspension of potassium hydride (20% dispersion in oil, 160 mg, 0.8 mmol, washed with hexane) in THF (1 cm3) under argon at room temperature, and the mixture kept for 3 days. Water was added slowly and the mixture extracted with ether (3  25 cm3). The extracts were dried (Na2SO4) and evaporated under reduced pressure. Chromatography (SiO2, EtOAc-hexane, 1:25) gave the *silyl* *ether* (56 mg, 56%); *R*f(EtOAc-hexane, 1:25) 0.38; **max(CCl4)/cm–1 1600 and 1495 (aromatic C=C), 1250 (SiMe2), 1060 (SiO), 875 (SiMe2) and 700 (Ph); **H(250 MHz; CDCl3) 7.35-7.16 (5 H, m, Ph), 5.00 (1 H, d, *J* 3.8, PhC*H*), 2.38 (1 H, qnd, *J* 6.8 and 3.8, C*H*MeCHSi), 1.83 (1 H, dsep, *J* 11.8 and 6.3, C*H*Me2), 1.11 (1 H, dd, *J* 11.8 and 6.3, CHSi), 0.98 (3 H, d, *J* 6.6, CHOCH*Me*), 0.97 (3 H, d, *J* 6.3, CH*Me*AMeB), 0.49 (3 H, d, *J* 7.1, CHMeA*Me*B), 0.33 (3 H, s, Si*Me*AMeB) and 0.28 (3 H, s, SiMeA*Me*B); *m*/*z* (EI) 248 (2.7%, M+), 91 (8, C7H7), 75 (57, Me2Si=OH) and 69 (17, C5H9)(Found: M+, 248.1596. C15H24OSi requires *M*, 248.1596), and unreacted starting material (26 mg, 20%).

**(3*RS*,4*RS*,5*SR*)-3-Isopropyl-2,2,4-trimethyl-5-phenyl-1,2-oxasilolane (±)-10**

Similarly, the anti-Cram alcohol **14** (65 mg, 0.2 mmol) gave after 2 h the silyl ether (27 mg, 54%); *R*f(EtOAc-hexane, 1:25) 0.23, identical (1H NMR) with the earlier sample.

**(2*RS*,3*RS*)-2,4-Dimethyl-3-dimethyl(vinyl)silylpentan-1-ol**

(2*RS*,3*RS*)-2,4-Dimethyl-3-dimethyl(phenyl)silylpentanol (0.50 g, 2.1 mmol) in dry THF (5 cm3) was stirred with a suspension of potassium hydride (0.47 g, 4.2 mmol) in THF (2 cm3) under argon at room temperature for 2 h, when TLC showed the absence of starting material, to give the cyclic silyl ether analogous to the oxasilolanes **10** and **15**. Vinylmagnesium bromide (1 mol dm–3 in THF, 5.2 cm3, 5.2 mmol) was added to the mixture at –78 °C, the mixture stirred at this temperature for 2 h, and then at room temperature for 2 h. Water (20 cm3) was added and the mixture was extracted with ether (3 30 cm3). The extracts were dried (Na2SO4) and evaporated under reduced pressure. Chromatography [SiO2, EtOAc-light petroleum (bp 40-60 °C), 1:2] gave the *alcohol* (0.33 g, 80%) as an oil; *R*f[EtOAc-light petroleum (bp 40-60 °C), 1:2] 0.23; **max(film)/cm–1 3319 (OH) and 1248 (SiMe); **H(250 MHz; CDCl3) 6.20 (1 H, dd, *J* 20.1 and 14.6, C*H*=CH2), 5.87 (1 H, dd, *J* 14.6 and 3.8, HC=C*H*AHB), 5.61 (1 H, dd, *J* 20.1 and 3.8, HC=CHA*H*B), 3.42 (1 H, dd, *J* 10.4 and 6.5, OC*H*AHB), 3.36 (1 H, dd, *J* 10.4 and 8.0, OCHA*H*B), 2.76 (1 H, m, OH), 2.05-1.85 (2 H, m, MeC*H*CH2OH and C*H*Me2), 1.0 (3 H, d, *J* 6.9, *Me*CHCH2OH), 0.94 (3 H, d, *J* 6.8, CH*Me*AMeB), 0.91 (3 H, d, *J* 6.9, CHMeA*Me*B), 0.72 (1 H, t, *J* 2.9, CHSi), 0.12 (3 H, s, Si*Me*AMeB) and 0.11 (3 H, s, SiMeA*Me*B); **C(63 MHz; CDCl3) 141.0–, 130.9–, 68.3+, 35.9–, 35.1–, 28.1–, 24.4–, 21.9–, 17.7–, –1.0– and –1.2–; *m*/*z* (EI) 173 (33%, M+ – C2H3), 111 (30, M+ – SiC2H3) and 85 (100, SiMe2C2H3)(Found: M+ – C2H3, 173.1369. C11H24OSi requires *M* – C2H3, 173.1361).

**(2*RS*,3*RS*,)-2,4-Dimethyl-3-dimethyl(vinyl)silylpentanal (±)-16**

Tetrapropylammonium perruthenate (27 mg, 0.078 mmol), (2*RS*,3*RS*)-2,4-dimethyl-3-dimethyl(vinyl)silylpentan-1-ol (0.29 g, 1.56 mmol), *N*-methylmorpholine *N*-oxide (0.27 g, 2.34 mmol) and powdered 4Å molecular sieves (0.84 g) were stirred in dichloromethane (3.2 cm3) at room temperature under argon for 2 h. The mixture was filtered through a short pad of silica, eluting with dichloromethane, and the filtrate evaporated to give the *aldehyde* (0.25 g, 86%) as an oil; *R*f[EtOAc-light petroleum (bp 40-60 °C), 1:2] 0.64; **max(film)/cm–1 1720 (C=O) and 1250 (SiMe); **H(250 MHz; CDCl3) 9.61 (1 H, s, CHO), 6.13 (1 H, dd, *J* 19.9 and 14.6, C*H*=CH2), 5.91 (1 H, dd, *J* 14.6 and 3.9, HC=C*H*AHB), 5.64 (1 H, dd, *J* 19.9 and 3.9, HC=CHA*H*B), 2.53 (1 H, qd, *J* 7.0 and 3.9, MeC*H*CHO), 1.95 (1 H, octet, *J* 6.4, C*H*Me2), 1.24 (1 H, dd, *J* 5.8. and 4.0, CHSi), 1.15 (3 H, d, *J* 7.0, CH*Me*CH2OH), 0.98 (3 H, d, *J* 6.8, CH*Me*AMeB), 0.94 (3 H, d, *J* 6.8, CHMeA*Me*B) and 0.10 (6 H, s, SiMe2); **C(63 MHz; CDCl3) 206.6–, 139.8–, 132.9–, 47.3–, 34.8–, 28.1–, 24.1–, 22.1–, 13.4–, –1.4– and –1.9–; *m*/*z* (EI) 198 (4%, M+), 183 (6, M+ – Me), 171 (14, M+ – C2H3), 143 (70, M+ – SiC2H3) and 85 (100, SiMe2C2H3)(Found: M+, 198.1437. C11H22OSi requires *M*, 198.1440).

**(3*RS*,4*RS*,5?)-3-Isopropyl-2,2,4-trimethyl-5-vinyl-1,2-oxasilolane (±)-17 and [(*E*,3*RS*,4*RS*)-7-chloro-2,4-dimethylhept-5-en-3-yl]dimethylsilanol (±)-18**

The aldehyde (±)-**16** (50 mg, 0.25 mmol) was added dropwise to a solution of titanium tetrachloride (0.30 cm3, 0.30 mmol) in dichloromethane (2.5 cm3) under argon at –78 °C. After 15 min, the allenylsilane18 (±)-**3** (0.12 mg, 0.75 mmol) in dichloromethane (0.4 cm3) was added dropwise, and the mixture kept for 15 min. The mixture was poured into saturated aqueous sodium hydrogencarbonate solution (10 cm3) and extracted with dichloromethane (4  10 cm3). The extracts were washed with saturated aqueous sodium hydrogencarbonate solution (2  10 cm3), dried (Na2SO4) and evaporated under reduced pressure. Chromatography [SiO2, EtOAc-light petroleum (bp 40-60 °C), 1:19] gave the *silyl* *ether* (16 mg, 33%) as an oil; *R*f[EtOAc-light petroleum (bp 40-60 °C), 1:19] 0.33; **max(film)/cm–1 1269 (SiMe); **H(250 MHz; CDCl3) 5.84 (1 H, ddd, *J* 17.0, 10.4 and 4.1, C*H*=CH2), 5.22 (1 H, dt, *J* 17.0 and 1.8, HC=C*H*AHB), 5.05 (1 H, dt, *J* 10.5 and 1.8, HC=CHA*H*B), 4.36 (1 H, m, CHOSi), 2.16 (1 H, m, MeC*H*CHSi), 1.79 (1 H, m, C*H*Me2), 1.18 (1 H, m, CHSi), 1.05 (3 H, d, *J* 7.1, *Me*CHCH2OH), 0.93 (6 H, d, *J* 6.8, CH*Me*2) and 0.10 (6 H, s, SiMe2), and the silanol (14 mg, 24%) as an oil; *R*f[EtOAc-light petroleum (bp 40-60 °C), 1:19] 0.07; **max(film)/cm–1 3583 (OH) and 1263 (SiMe); **H(250 MHz; CDCl3) 5.87 (1 H, dd, *J* 15.3 and 6.8, C*H*=CHCH2), 5.59 (1 H, dt, *J* 15.3 and 7.1, CH=C*H*CH2), 4.06 (2 H, d, *J* 7.0, CH2Cl), 2.58 (1 H, m, C*H*Me), 1.96 (1 H, m, C*H*Me2), 1.13 (3 H, d, *J* 6.8, CH*Me*), 1.01 (3 H, d, *J* 6.9, CH*Me*AMeB), 1.00 (3 H, d, *J* 6.9, CHMeA*Me*B) and 0.36 (6 H, s, SiMe2); *m*/*z* (ESI) 257 (M+ + Na)(Found: M+ + Na, 257.1098. C11H23SiOCl requires *M* + Na, 257.1104).

**Benzyl (3*RS*,4*RS*)-2,4-dimethylhept-5-yn-3-yl ether (±)-19**

Following Provelenghiou,82 sodium hydride (60% dispersion in oil, 117 mg, 2.91 mmol) was washed under argon with light petroleum (bp 40-60 °C) and dry THF (0.5 cm3) was added. The mixture was cooled to 0 °C and the alcohol (±)-**4** (240 mg, 1.71 mmol) in dry THF (1.5 cm3) was added. When effervescence stopped, tetrabutylammonium iodide (31.7 mg, 0.086 mmol) in dry THF (0.5 cm3) and benzyl bromide (0.52 cm3, 4.29 mmol) were added at 0 °C, the mixture was refluxed for 15 h, and cooled to room temperature. Ethyl acetate (19 cm3) was added, and the organic layer was washed with brine (2  5 cm3). The aqueous layer was extracted with more ethyl acetate (2  15 cm3). The combined organic layers were dried (Na2SO4), concentrated under reduced pressure, and chromatographed [SiO2, light petroleum (bp 40-60 °C)-EtOAc, 95:5 and 97:3], principally to separate it from dibenzyl ether, to give the *benzyl* *ether* (341 mg, 87%); *R*f(hexane-CH2Cl2, 80:20) 0.3 or [light petroleum (bp 40-60 °C)-EtOAc, 90:10] 0.71; **max(CCl4)/cm–1 1605 and 1500 (aromatic C=C), 1095 and 1070 (COC) and 700 (Ph); **H(250 MHz; CDCl3) 7.56-7.24 (5 H, m, Ph), 4.75 (1 H, d, *J* 11.1, C*H*AHBPh), 4.61 (1 H, d, *J* 11.1, CHA*H*BPh), 3.15 (1 H, dd, *J* 6.9 and 4.7, C*H*OBn), 2.64 (1 H, qdq, *J* 6.9, 4.7 and 2.4, CCC*H*Me), 2.09 (1 H, m, C*H*Me2), 1.79 (3 H, d, *J* 2.4, *Me*CC), 1.23 (3 H, d, *J* 6.9, *Me*CHCHOBn), 1.06 (3 H, d, *J* 7.0, CH*Me*AMeB) and 0.98 (3 H, d, *J* 6.7, CHMeA*Me*B); **C(63 MHz; CDCl3) 139.0, 128.2, 127.8, 127.7, 87.9, 82.3, 75.3, 72.1, 31.1, 29.4, 20.4, 17.3, 17.1 and 3.7; *m*/*z* (EI) 230 (1.6%, *M*+), 229 (3, *M* – H), 187 (56, *M* – C3H7), 163 (54, *M* – C5H7),105 (61, C7H5O+), 91 (100, C7H7+) and 77 (22, Ph)(Found: M+, 230.1655. C16H22O requires *M*, 230.1670), and, in a different run, the minor diastereoisomer, (3RS,4SR)-2,4-*dimethylhept*-5-*yn*-3-*ol* *benzyl* *ether* (2%, slightly contaminated with dibenzyl ether); *R*f(CH2Cl2-hexane, 1:3) 0.22; **max(CCl4)/cm–1 1606 and 1496 (aromatic C=C), 1094 and 1070 (COC) and 696 (Ph); **H(250 MHz; CDCl3) 7.41-7.22 (5 H, m, Ph), 4.74 (1 H, d, *J* 11.2, PhC*H*AHBO), 4.59 (1 H, d, *J* 11.2, PhCHAC*H*BO), 2.97 (1 H, t, *J* 5.8, C*H*OBn), 2.69 (1 H, qdq, *J* 7.1, 4.8 and 2.4, MeCCC*H*Me), 1.94 (1 H, oct, *J* 6.7, C*H*Me2), 1.79 (3 H, d, *J* 2.4, *Me*CC), 1.18 (3 H, d, *J* 7.1, MeCCCH*Me*), 0.97 (3 H, d, *J* 6.8, CH*Me*AMeB) and 0.96 (3 H, d, *J* 6.7, CHMeA*Me*B); *m*/*z* (EI) 215 (1.6%, M+ – Me), 187 (6, M – C3H7), 163 (60, M – C5H7), 105 (60, C7H5O), 91 (100, C7H7) and 77 (68, C6H5)(Found: M+ – Me, 215.1431. C16H22O requires *M* – Me, 215.1435).

**(3*RS*,4*RS*,5*E*)-2,4-Dimethyl-6-dimethyl(phenyl)silylhept-5-en-3-ol (±)-20**

The alcohol (±)-**4** (150 mg, 1.07 mmol) in dry THF (1.5 cm3) was added at –78 °C under argon to lithium bis[dimethyl(phenyl)silyl]cuprate [prepared from dimethyl(phenyl)silyllithium (4.29 mmol) and copper(I) cyanide (192 mg, 2.14 mmol)] in THF (6.8 cm3), and the mixture stirred at –78 °C for 2.6 h. Ammonium chloride solution (2 cm3, saturated) was added, the mixture warmed to room temperature, poured into ammonium chloride solution (5 cm3, saturated). The mixture was extracted with ether (3  45 cm3) and the combined organic layers washed with ammonium chloride solution (2  10 cm3, saturated) and brine (10 cm3), dried (MgSO4), concentrated under reduced pressure and chromatographed [SiO2, light petroleum (bp 40-60 °C)-EtOAc, 95:5] to give the *vinylsilane* (227.8 mg, 77%); *R*f[lightpetroleum (bp 40-60 °C)-EtOAc, 90:10] 0.33; **max(CH2Cl2)/cm–1 3500 (OH), 1620 and 840 (C=C), 1115 (SiPh) and 840 (SiMe2); **H(250 MHz; CDCl3) 7.5-7.46 (2 H, m, Ph), 7.36-7.32 (3 H, m, Ph), 5.67 (1 H, dq, *J* 9.24 and 1.71, C*H*=CMeSi), 3.21 (1 H, dd, *J* 7.3 and 4.4, C*H*OH), 2.74 (1 H, m, C=CHC*H*Me), 1.77 (1 H, m, C*H*Me2), 1.69 (3 H, d, *J* 1.7, *Me*CSi=CH), 1.41 (1 H, br, CHO*H*), 1.02 (3 H, d, *J* 6.7, *Me*CHCHOH), 0.96 (3 H, d, *J* 6.9, CH*Me*AMeB), 0.87 (3 H, d, *J* 6.8, CHMeA*Me*B) and 0.33 (6 H, s, SiMe2); **C(63 MHz; CDCl3) 144.2, 138.7, 133.9, 133.3, 128.8, 127.7, 80.3, 36.2, 30.9, 20.2, 16.0, 15.9, 15.0 and –3.4; *m*/*z* (EI) 258 (0.3%, *M* – H2O), 233 (34, *M* – C3H7), 204 (80, *M* – C4H8O), 189 (79, *M* – Me – C4H8O), 175 (46, *M* – Et – C4H8O), 135 (100, PhMe2Si+) and 73 (41, C3H7OH)(Found: M+ – H2O, 258.1826. C17H28OSi requires *M* – H2O, 258.1803).

**Benzyl (3*RS*,4*RS*,5*E*)-2,4-dimethyl-6-dimethyl(phenyl)silylhept-5-en-3-yl ether (±)-21**

Similarly, the benzyl ether (±)-**19** (805 mg, 3.5 mmol) in THF (15 cm3) was added to the silylcuprate (14 mmol) at 0 °C and kept for 1 h. The same workup and chromatography (SiO2, CH2Cl2-hexane, 1:3) gave the *vinylsilane* (1.024 g, 80%); *R*f(CH2Cl2-hexane, 1:3) 0.31; **max(CCl4)/cm–1 1620 (C=C), 1250 (SiMe), 1110 (SiPh) and 700 (Ph); **H(250 MHz; CDCl3) 7.50-7.23 (10 H, m, 2  Ph), 5.75 (1 H, dq, *J* 9.2 and 1.7, C=CH), 4.57 (2 H, s, PhC*H*2), 3.03 (1 H, dd, *J* 6.5 and 5.1, C*H*OBn), 2.90 (1 H, dqd, *J* 9.2, 6.6 and 6.5, C=CHC*H*Me), 1.84 (1 H, sepd, *J* 6.8 and 5.1, C*H*Me2), 1.69 (3 H, d, *J* 1.7, *Me*C=CH), 1.04 (3 H, d, *J* 6.6, C=CHCH*Me*), 0.98 (3 H, d, *J* 6.9, CH*Me*AMeB), 0.94 (3 H, d, *J* 6.7, CHMeA*Me*B) and 0.31 (6 H, s, SiMe2); *m*/*z* (EI) 323 (2%, M – C3H7), 289 (6.2, M+ – C6H5), 259 (50, M – OBn), 203 [70, (PhMe2Si)MeC=CHCHMe], 135 (100, PhMe2Si), 105 (65, C7H5O) and 73 (95, iPrCH2O); **C(100 MHz; CDCl3) 145.5, 139.2, 138.7, 134.0, 132.5, 128.8, 128.3, 127.7, 127.6, 127.4, 89.0, 75.5, 35.9, 31.4, 20.4, 17.7, 16.1, 14.9 and –3.4 (Found: M+ – Ph, 289.1989. C24H34OSi requires *M* – Ph, 289.1988).

**[(3*RS*,4*RS*,5*E*)-2,4-Dimethyl-6-dimethyl(phenyl)silylhept-5-en-3-yloxy](*tert*-butyl)dimethylsilane (±)-22**

The alcohol (±)-**20** (160 mg, 0.58 mmol), *tert*-butyldimethylsilyl trifluoromethanesulfonate (triflate) (184 mg, 0.7 mmol) and triethylamine (88 mg, 0.87 mmol) were kept in dichloromethane (10 cm3) under nitrogen at 0 °C overnight. The mixture was poured into water and ice, and extracted with ether. The organic layer was washed with sodium bicarbonate solution and brine, dried (MgSO4), and evaporated under reduced pressure. Distillation (kugelrohr, 140 °C at 0.2 mmHg) gave the ether (223 mg, 99%); *R*f(hexane) 0.51; **H(100 MHz; CDCl3) 7.55-7.48 (2 H, m, ArH), 7.43-7.33 (3 H, m, ArH), 5.71 (1 H, dd, *J* 9.4 and 1.7, C=CH), 3.33 (1 H, dd, *J* 6.5 and 3.7, CHOSi), 2.79 (1 H, m, C*H*Me), 1.77 (1 H, m, C*H*Me2), 1.69 (3 H, d, *J* 1.7, C=CMe), 1.00-0.85 (18 H, m, But and 3  CH*Me*), 0.35 (6 H, s, SiMe2) and 0.07 (6 H, s, SiMe2); *m*/*z* (EI) 347 (10%, M+ – iPr), 333 (5, M – iPrCH2), 187 (100, iPrCHOSiMe2tBu), 135 (38, SiMe2Ph) and 131 (22, OSiMe2tBu)(Found: M+ – iPr, 347.2229. C21H38OSi2 requires *M* – iPr, 347.2226).

**Benzyl (3*RS*,4*RS*,5*E*)-2,4-dimethyl-6-iodohept-5-en-3-yl ether (±)-23**

**Method A.** Following Miller and McGarvey,83 iodine monochloride (1 mol dm–3 solution in CH2Cl2, 1 cm3, 1 mmol) was added slowly to a solution of the vinylsilane (±)-**21** (183 mg, 0.5 mmol) in dichloromethane (5 cm3) under argon at –78 °C in the dark, and the mixture kept for 30 min. The mixture was diluted with dichloromethane (100 cm3) and washed with saturated sodium thiosulfate solution. The dichloromethane solution was dried (Na2SO4) and concentrated under reduced pressure. Chromatography (SiO2, CH2Cl2-hexane, 1:4, protecting the column from light) gave the *vinyl* *iodide* (98 mg, 55%); *R*f(CH2Cl2-hexane, 1:4) 0.26; **max(CH2Cl2)/cm–1 1640 (C=C), 1500 (aromatic C=C) and 1060 (COC); **H(250 MHz; CDCl3) 7.38-7.27 (5 H, m, Ph), 6.07 (1 H, dq, *J* 10.2 and 1.5, MeIC=C*H*), 4.60 (1 H, d, *J* 11.1, C*H*AHBPh), 4.55 (1 H, d, *J* 11.1, CHA*H*BPh), 2.99 (1 H, dd, *J* 6.8 and 4.7, C*H*OBn), 2.65 (1 H, dqn, *J* 10.2 and 6.8, C=CHC*H*Me), 2.40 (3 H, d, *J* 1.5, *Me*IC=CH), 1.83 (1 H, sepd, *J* 6.8 and 4.7, C*H*Me2), 1.04 (3 H, d, *J* 6.8, C=CHCH*Me*), 0.98 (3 H, d, *J* 6.8, CH*Me*AMeB) and 0.94 (3 H, d, *J* 6.8, CHMeA*Me*B); *m*/*z* (EI) 195 (21%, MeIC=CHCHMe), 163 (17, iPrCHOBn) and 91 (100, PhCH2)(Found: M+ – C11H15O, 194.9656 and M+ – C5H8I, 163.1126. C16H23IO requires *M* – C11H15O, 194.9673 and C16H23IO requires *M* – C5H8I, 163.1123), with discernible and interpretable 1H NMR and MS signals from the (*Z*)-vinyl chloride [iodide:chloride 87:13 (1H NMR)]: ** 5.34 (1 H, dq, *J* 9.2 and 1.2, MeClC=C*H*) and 2.06 (3 H, d, *J* 1.2, *Me*ClC=CH); *m*/*z*, 105 (6, Me37ClC=CHCHMe) and 103 (10, Me35ClC=CHCHMe)(Found: M+ – C11H15O, 103.0322. C16H23O35Cl – C11H15O requires *M*, 103.0314). The double bond geometries were determined by NOE experiments, and by the conversion to the cis alkene described below.

**Method B.** Sublimed iodine (15 mg, 0.059 mmol) in dichloromethane (0.5 cm3) was added to a solution of the vinylsilane (20 mg, 0.0546 mmol) in dichloromethane (0.5 mmol) in the presence of 4Å molecular sieves under argon at room temperature in the dark, and the mixture stirred for 22 h. A similar workup and chromatography (SiO2, CH2Cl2-hexane, 3:7) gave a mixture (10 mg) of the (*E*)-vinyl iodide (19%) and the product of protodesilylation, the (*Z*)-alkene (50%), identical with the sample described below.

**Benzyl (3*RS*,4*RS*,5*Z*)-2,4-dimethylhept-5-en-3-yl ether**

*tert*-Butyllithium (1.7 mol dm–3 solution in pentane, 69 l, 0.0118 mmol) was added to the mixture of the vinyl iodide (±)-**23** and the alkene (19 mg) in THF (2 cm3) under argon at –40 °C. After 10 min, water was added and the mixture was extracted with dichloromethane. The extracts were dried (Na2SO4) and concentrated under reduced pressure. Chromatography (SiO2, CH2Cl2-hexane, 1:3) gave the *cis* *alkene* (14.5 mg); *R*f(CH2Cl2-hexane, 1:3) 0.33; **max(CH2Cl2)/cm–1 3031 (C=CH), 1654 (C=C), 1604 and 1496 (aromatic C=C) and 1097 and 1065 (COC); **H(400 MHz; CDCl3) 7.37-7.26 (5 H, m, Ph), 5.40 (1 H, dqd, *J* 10.8, 6.7 and 0.7, MeC*H*=CH), 5.29 (1 H, ddq, *J* 10.8, 9.7 and 1.6, MeCH=C*H*), 4.62 (1 H, d, *J* 11.1, PhC*H*AHBO), 4.58 (1 H, d, *J* 11.1, PhCHA*H*BO), 2.99 (1 H, dd, *J* 7.2 and 4.5, C*H*OBn), 2.76 ( 1 H, ddq, *J* 9.7, 7.2 and 6.7, C=CHC*H*Me), 1.85 (1 H, sepd, *J* 6.8 and 4.5, Me2C*H*), 1.63 (3 H, dd, *J* 6.7 and 1.6, *Me*CH=CH), 1.04 (3 H, d, *J* 6.7, C=CHCH*Me*), 0.99 (3 H, d, *J* 6.9, CH*Me*AMeB) and 0.93 (3 H, d, *J* 6.7, CHMeA*Me*B); **C(100 MHz; CDCl3) 139.2, 134.6, 128.3, 127.6, 127.3, 122.7, 69.1, 75.5, 34.9, 31.1, 20.6, 17.1, 16.8 and 13.0; *m*/*z* (EI) 232 (0.1%, M+), 231 (0.5, M – H), 189 (27, M – iPr), 163 (60, Me2CHCHOBn), 105 (60, PhCO), 91 (100, PhCH2) and 69 (65, MeCH=CHCHMe)(Found M+: 232.1821. C16H24O requires *M*, 232.1827).

**[(3*RS*,4*RS*,5*E*)-2,4-Dimethyl-6-iodohept-5-en-3-yloxy](*tert*-butyl)dimethylsilane (±)-24**

**Method A.** In a reaction similar to the iododesilylation described above as Method B, the silyl ether (±)-**22** (205 mg, 0.53 mmol) and chromatography (SiO2, hexane and hexane EtOAc, 7:1) and distillation (kugelrohr, 150 °C at 15 mmHg) gave the (E)-*vinyl* *iodide* (±)-**24** (28%); **max(film)/cm–1 1620 (C=C); **H(90 MHz; CDCl3) matching the better data below; *m*/*z* (EI) 339 (3%, M+ – iPr), 258 (18), 187 (60) and 73 (100, iPrCHOH)(Found: M+ – iPr, 339.0615. C15H31IOSi requires *M* – iPr, 339.0641), the product of protodeiodination *tert*-butyldimethylsilyl (3*RS*,4*RS*,5*Z*)-2,4-dimethyl-hept-5-en-3-yl ether (35%); **H(90 MHz; CDCl3) 5.60-5.13 (2 H, m, CH=CH), 3.26 (1 H, dd, *J* 6.6 and 3.9, CHOSi) 2.64 (1 H, m, C=CHC*H*Me), 1.75 (1 H, m, C*H*Me2), 1.62, (3 H, d, *J* 6.0, C=CCH*Me*), 1.00-0.80 (18 H, m, tBu and 3  CH*Me*) and 0.08 (6 H, s, SiMe2), the (*Z*)-vinyl iodide which has lost the silyl group, (3RS,4RS,5Z)-2,4-*dimethyl-6-iodohept*-5-*en*-3-*ol* (2%); **max(film)/cm–1 3400 (OH); **H(90 MHz; CDCl3) 6.08 (1 H, br d, *J* 9.6, MeIC=C*H*), 3.13 (1 H, dd, *J* 6.9 and 4.8, C*H*OH), 2.50 (1 H, m, C=CHC*H*Me), 2.37 (3 H, d, *J* 1.5, *Me*IC=CH), 1.62 (1 H, m, C*H*Me2), 1.43 (1 H, s, OH) and 1.07-0.80 (9 H, m, 3  CH*Me*); *m*/*z* (EI) 268 (8%, M+), 196 (39, M – iPrCHO), 73 (63, iPrCHOH) and 69 (100)(Found: M+, 268.0335. C9H17IO requires *M*, 268.0324), which was converted (87%) into the silyl ether (±)-**24** with *tert*-butyldimethylsilyl triflate in the usual way, and the (*Z*)-alkene (16%) which had lost the silyl protecting group.

**Method B.** In a reaction similar to the preparation of the silyl ether (±)-**22** above, the alcohol (±)-**4** (2.87 g, 20.48 mmol), *tert*-butyldimethylsilyl triflate and 2,6-lutidine, with workup and chromatography [SiO2, light petroleum (bp 40-60 °C)] gave tert-*butyldimethylsilyl* (3RS,4RS)-2,4-*dimethylhept*-6-*yn*-3-*yl* *ether* (5.1 g, 97%) as an oil; **H(250 MHz; CDCl3) 3.37 (1 H, dd, *J* 6.6 and 3.8, CHOSi), 2.50 (1 H, qnd, *J* 6.8 and 2.4, C*H*MeCHOSi), 1.99 (1 H, sepd, *J* 6.8 and 3.8, C*H*Me2), 1.8 (3 H, d, *J* 2.4, CH*Me*), 1.12 (3 H, d, *J* 7.0, CH*Me*), 0.91 (9 H, s, SitBu), 0.90 (3 H, d, *J* 6.4, CH*Me*), 0.09 (3 H, s, Si*Me*AMeB) and 0.07 (3 H, s, SiMeA*Me*B); **C 82.9+, 80.5–, 32.1–, 30.4–, 26.2–, 20.4–, 18.5+, 17.7–, 17.1–, 3.6–, –3.7– and –3.8–; *m*/*z* (ESI) 277.2 (100%, M+ + Na)(Found: M+ + Na, 277.1963. C15H30OSi requires *M* + Na, 277.1964). Following Nicolaou,84 zirconocene hydride chloride (3.0 g, 11.7 mmol) and the silyl ether (1.48 g, 5.83 mmol) in dry dichloromethane (25 cm3) were kept under argon at room temperature for 12 h. The solution was cooled to 0 °C, iodine (1.78 g, 6.99 mmol) in carbon tetrachloride was added and the mixture kept for 15 min. Saturated aqueous sodium sulfite solution (20 cm3) was added, and the mixture stirred vigorously until it was colourless. The layers were separated and the aqueous layer was extracted with dichloromethane (2  20 cm3). The combined organic layers were washed with water (1  30 cm3), brine (30 cm3), dried (MgSO4) and concentrated under reduced pressure. The residue was chromatographed [SiO2, light petroleum (bp 40-60 °C)] to give cleanly the *vinyl* *iodide* (1.92 g, 86%) as an oil; **H(250 MHz; CDCl3) 6.03 (1 H, dq, *J* 10.2 and 1.5, C=CH), 3.24 (1 H, dd, *J* 5.8 and 4.4, CHOSi), 2.55 (1 H, dqn, *J* 10.2 and 6.7, C=CHC*H*Me), 2.38 (3 H, d, 1.5, C=CMe), 1.72 (1 H, sepd, 7.0 and4.4, C*H*Me2), 0.96 (3 H, d, *J* 6.8, CH*Me*), 0.92 (12 H, s, tBuSi and CH*Me*), 0.87 (3 H, d, *J* 6.9, CH*Me*), 0.07 (3 H, s, Si*Me*AMeB) and 0.05 (3 H, s, SiMeA*Me*B); **C(63 MHz; CDCl3) 145.7–, 80.3–, 39.4–, 32.3–, 27.7–, 26.2–, 20.0–, 17.7–, 16.1– and –3.6–; *m*/*z* (ESI) 405.1 (80%, M+ + Na)(Found: M+ + Na, 405.1079. C15H31IOSi requires *M* + Na, 405.1089).

**Benzyl (3*RS*,4*RS*,5*Z*)-6-bromo-2,4-dimethylhept-5-en-3-yl ether (±)-25**

Following Brook,85 bromine (28 l, 0.55 mmol) in dichloromethane (1 cm3) was added dropwise to a solution of the vinylsilane (±)-**21** (183 mg, 0.5 mmol) in dichloromethane (3 cm3) under argon at –78 °C, and the mixture kept for 15 min. The solvent was removed under reduced pressure. Chromatography (SiO2, CH2Cl2-hexane, 3:7) gave the vinyl bromide (66 mg, 42%); *R*f(CH2Cl2-hexane, 3:7) 0.38; **max(CCl4)/cm–1 1655 (C=C), 1495 (aromatic C=C), 1075 (COC) and 700 (Ph); **H(250 MHz; CDCl3) 7.42-7.23 (5 H, m, Ph), 5.50 (1 H, dq, *J* 9.1 and 1.3, MeBrC=C*H*), 4.60 (1 H, d, *J* 11.2, C*H*AHBPh), 4.53 (1 H, d, *J* 11.2, CHA*H*BPh), 3.06 (1 H, t, *J* 5.8, C*H*OBn), 2.83 (1 H, dqn, *J* 9.1 and 6.5, C=CHC*H*Me), 2.24 (3 H, d, *J* 1.3, *Me*BrC=CH), 1.82 (1 H, oct, *J* 6.7, C*H*Me2), 1.03 (3 H, d, *J* 6.7, C=CHCH*Me*), 0.98 (3 H, d, *J* 6.7, CH*MeA*MeB) and 0.97 (3 H, d, *J* 6.8, CHMeA*Me*B); *m*/*z* (EI) 311 (0.8%, M+ – H, 81Br), 309 (0.7, M – H, 79Br), 105 (100, C7H5O), 91 (37, C7H7) and 77 (32, C6H5)(Found: M+ – H, 311.0852 and M+ – H, 309.0866. C16H23O81Br requires *M* – H, 311.0835 and C16H23O79Br – H requires *M*, 309.0854). The double bond geometry was determined by NOE experiments and by the conversion to the trans alkene described below

**Benzyl (3*RS*,4*RS*,5*E*)-2,4-dimethylhept-5-en-3-yl ether**

*tert*-Butyllithium (1.7 mol dm–3 solution in pentane, 80 l, 0.136 mmol) was added to the vinyl bromide (±)-**25** (20 mg, 0.062 mmol) in THF (2 cm3) at –40 °C under argon, and the mixture kept for 10 min. Water (2 cm3) was added, and the mixture extracted with dichloromethane (3  15 cm3). The extracts were dried (Na2SO4) and evaporated under reduced pressure. Chromatography (SiO2, CH2Cl2-hexane, 1:3) gave the *trans* *alkene* (13.5 mg, 90%); *R*f(CH2Cl2-hexane, 1:3) 0.33; **max(CH2Cl2)/cm–1 3030 (C=CH), 1060 and 1496 (aromatic C=C), 1098 and 1065 (COC) and 972 (HC=CH trans); **H(400 MHz; CDCl3) 7.37-7.24 (5 H, m, Ph), 5.46 (1 H, dq, *J* 15.3 and 5.4, MeC*H*=CH), 5.39 (1 H, ddq, *J* 15.3, 6.4 and 0.9, MeCH=C*H*), 4.59 (1 H, d, *J* 11.1, PhC*H*AHBO), 4.54 (1 H, d, *J* 11.1, PhCHA*H*BO), 2.95 (1 H, dd, *J* 6.3 and 5.2, C*H*OBn), 2.39 ( 1 H, sextet, *J* 6.7, C=CHC*H*Me), 1.86 (1 H, sepd, *J* 6.8 and 5.2, Me2C*H*), 1.65 (3 H, d, *J* 5.4, *Me*CH=CH), 1.04 (3 H, d, *J* 6.8, C=CHCH*Me*), 0.95 (3 H, d, *J* 6.9, CH*Me*AMeB) and 0.93 (3 H, d, *J* 6.7, CHMeA*Me*B); **C(100 MHz; CDCl3) 139.3, 135.3, 128.2, 127.6, 127.3, 123.9, 89.1, 75.2, 40.1, 30.9, 20.5, 18.0, 17.4 and 16.2; *m*/*z* (EI) 190 (1%, M+ – C3H6), 163 (68, Me2CHCHOCH2Ph), 105 (69, PhCO), 91 (100, PhCH2) and 69 (81, MeCH=CHCHMe)(Found: M+ – C3H6, 190.1341. C16H24O requires *M* – C3H6, 190.1357).

**[(3*RS*,4*RS*,5*E*)-2,4,6-Trimethyldec-5-en-3-yloxy](*tert*-butyl)dimethylsilane (±)-26**

n-Butyllithium (1.6 mol dm–3 in hexanes, 0.8 cm3, 1.28 mmol) and copper(I) iodide (122 mg, 0.64 mmol) were stirred in ether (4 cm3) at 0 °C for 10 min, and cooled to –78 °C. The vinyl iodide (±)-**24** (60 mg, 0.16 mmol) in ether (1 cm3) was added and the mixture stirred at –78 °C for 4 h and at 0 °C for 1 h. The mixture was poured into ammonium chloride solution and extracted with ether. The organic layer was washed with brine, dried (MgSO4) and concentrated under reduced pressure. The residue was distilled (kugelrohr, 110 °C at 1.5 mmHg) to give the *alkene* (45 mg, 90%); *R*f(hexane-EtOAc, 19:1) 0.78; **H(90 MHz; CDCl3) 4.94 (1 H, dsextet, *J* 9.8 and 1.3, C=CH), 3.20 (1 H, dd, *J* 6.8 and 3.6, CHOSi), 2.47 (1 H, m, C=CC*H*Me), 1.94 (2 H, t, *J* 7.1, C=CCH2), 1.74 (1 H, m, C*H*Me2), 1.58 (3 H, d, *J* 1.3, C=CMe), 1.31 (4 H, m, 2  CH2), 0.93-0.81 (21 H, m, 7  Me) and 0.03 (6 H, s, Me2Si); *m*/*z* (EI) 297 (5%, *M*+ – Me), 269 (10, M – iPr), 187 (100, iPrCHOSiTBS), 131 (33, OTBS) and 115 (18, TBS)(Found: M+ – Me, 297.2613. C19H40OSi requires *M* – Me, 297.2613).

**[(3*RS*,4*RS*,5*E*)-2,4,6,8-Tetramethylnon-5-en-3-yloxy](*tert*-butyl)dimethylsilane (±)-27**

Similarly, isobutyllithium (1.7 mol dm–3 in ether, 1.84 cm3, 3.13 mmol), copper(I) iodide (297 mg, 1.56 mmol) and the vinyl iodide (±)-**24** (150 mg, 0.39 mmol) gave the *alkene* (57 mg, 47%); *R*f(hexane) 0.41; **H(90 MHz; CDCl3) 5.29 (1 H, br d, *J* 9.5, C=CH), 3.27 (1 H, dd, *J* 6.4 and 3.8, CHOSi), 2.61 (1 H, m, C=CC*H*Me), 1.76 (3 H, br s, C=CMe), 1.71 (4 H, m, C*H*2 and 2  C*H*Me2), 0.96-0.82 (24 H, m, 8  Me) and 0.04 (6 H, s, Me2Si); *m*/*z* (EI) 223 (8%), 194 (11), 187 (100, iPrCHOSiTBS), 131 (11, OTBS), 115 (11, TBS) and 73 (95).

**1-Cyclohexylpropyne**

Following Corey and Fuchs,86 (2,2-dibromoethenyl)cyclohexane87 (1.22 g, 4.5 mmol) in THF (20 cm3) was cooled to –78 °C under argon, and n-butyllithium (2.3 mol dm–3 solution in hexane, 4.2 cm3, 9.5 mmol) added. The mixture was stirred at –78 °C for 1 h, then gradually warmed to room temperature and kept at this temperature for 1 h. The solution was recooled to –78 °C, methyl iodide (0.56 cm3, 9 mmol) added, and the solution kept at room temperature overnight. Saturated aqueous ammonium chloride solution (15 cm3) was added, the aqueous layer was extracted with ether (3  20 cm3), and the combined organic layers were washed with brine, dried (MgSO4), and evaporated under reduced pressure. The residue was chromatographed [SiO2, light petroleum (bp 40-60 °C)] to give the acetylene (385 mg, 70%) as an oil; *R*f[light petroleum (bp 40-60 °C)] 0.6; **H(250 MHz; CDCl3) 2.3 (1 H, m, cyclohexyl CH), 1.78 (3 H, d, *J* 2.4, MeCC), 2.20-1.15 (10 H, m, 5  CH2), identical with a commercial sample that we also used.

**(*E*)-1-Cyclohexyl-2-dimethyl(phenyl)silylpropene**

Dimethyl(phenyl)silyllithium (1.0 mol dm–3 solution in THF, 2.5 cm3, 2.5 mmol) was added to dry copper(I) cyanide (110 mg, 1.2 mmol) at 0 °C with stirring under argon, and the mixture stirred for 40 min. 1-Cyclohexylpropyne (0.11 cm3, 0.8 mmol) in dry THF (0.5 cm3) was added dropwise, and the solution was stirred for 1 h at 0 °C. Basic saturated aqueous ammonium chloride (10 cm3) and ether (40 cm3) were added. The organic layer was washed with basic saturated aqueous ammonium chloride (2  10 cm3, until the aqueous layer was colourless). The combined aqueous layers were extracted with ether (2  10 cm3) and the combined organic layers were washed with brine (1  10 cm3), dried (MgSO4) and evaporated under reduced pressure. Chromatography [SiO2, light petroleum (bp 40-60 °C)] gave the *vinylsilane* (200 mg, 100%) as an oil; *R*f[light petroleum (bp 40-60 °C)] 0.52; **max(film)/cm–1 1617 (C=C), 1247 (SiC) and 831 (SiC); **H(250 MHz; CDCl3) 7.49 (2 H, m, ArH), 7.45 (3 H, m, ArH), 5.65 (1 H, dq, *J* 8.6 and 1.7, C=CH), 2.37 (1 H, m, cyclohexyl CH), 1.67 (4 H, m, 2  CH2), 1.66 (3 H, d, *J* 1.7, MeC=C), 1.37-1.00 (6 H, m, 3  CH2) and 0.31 (6 H, s, Me2Si); **C(100 MHz; CDCl3) 147.6–, 139.1+, 133.9–, 131.4+, 128.7–, 127.6–, 37.3–, 32.7+, 26.1+, 26.0+, 14.7– and –3.4–; *m*/*z* (EI) 258 (10%, M), 169 (60) and 135 (71, PhMe2Si)(Found: M+, 258.1794. C17H26Si requires *M*, 258.1804).

**(*E*)-1-Cyclohexyl-2-iodopropene 29**

The method of Kishi was followed.25 The vinylsilane (518 mg, 2.0 mmol) and *N*-iodosuccinimide (944 mg, 4.0 mmol) were stirred in acetonitrile (5 cm3) for 30 min. Saturated aqueous sodium sulfite (10 cm3) was added, and the mixture stirred vigorously until a clear colourless solution was obtained. A mixture of light petroleum (bp 40-60 °C) and ethyl acetate (1:1, v/v) was added, the organic layer was washed with aqueous sodium hydroxide (2  10 cm3, 1 mol dm–3) and brine (10 cm3), dried (MgSO4), and evaporated under reduced pressure. Chromatography [SiO2, light petroleum (bp 40-60 °C)] gave the *vinyl* *iodide* (365 mg, 73%) as an oil; *R*f[light petroleum (bp 40-60 °C), 1:1] 0.85; **max(film)/cm–1 1633 (C=C); **H(250 MHz; CDCl3) 6.02 (1 H, dq, *J* 9.4 and 1.5, C=CH), 2.38 (3 H, d, *J* 1.5, MeC=C), 2.24 (1 H, m, cyclohexyl C*H*), 1.67 (4 H, m, 2  CH2) and 1.29-1.06 (6 H, m, 3 CH2); **C(100 MHz; CDCl3) 147.1–, 127.9+, 40.1–, 32.5+, 27.7–, 25.8+ and 25.7+; *m*/*z* (EI) 123 (1%, M+ – I)(Found: M+ – I, 123.1181. C9H15I requires *M* – I, 123.1174).

**Methyl (2*S*,3*S*)-2,4-dimethyl-3-triisopropylsilyloxypentanoate 30 and (1*E*,3*E*)-1,4-dicyclohexyl-2,3-dimethylbuta-1,3-diene 31**

A stirred suspension of zinc dust (16 mg, 0.25 mmol) in THF (40 l) was treated with 1,2-dibromoethane (0.6 l, 0.008 mmol) under argon. The mixture was heated gently until the solvent boiled. The zinc suspension was stirred for a few minutes and heated again. The process was repeated three times, after which chlorotrimethylsilane (0.4 l, 0.004 mmol) was added. The mixture was heated to 30 °C, and methyl (2*S*,3*R*,4*R*)-5-iodo-3-triisopropylsilyloxy-2,4-dimethylpentanoate (see below) (28 mg, 0.06 mmol) in THF (31 l) was added dropwise. The mixture was then stirred for 4 h at 35-45 °C to give a dark brown-yellow solution of the zinc reagent **28**. The solution was cooled to room temperature and allowed to stand for 1 h. The supernatant layer was transferred by cannula to the vinyl iodide **29** (8 mg, 0.031 mmol) and Pd(dppf)Cl2 (1.5 mg, 0.0016 mmol) in dry DMF (50 l) at room temperature, and stirred for 16 h. Ether (1 cm3) and ammonium chloride solution (saturated, 1 cm3) were added. The aqueous layer was extracted with ether (3 1 cm3). The combined organic layers were washed with brine (1 2 cm3), dried (MgSO4), and evaporated under reduced pressure. The residue was chromatographed [SiO2, light petroleum (bp 40-60 °C)] to give the *ester* **30** (11.7 mg, 58%); *R*f[EtOAc-light petroleum (bp 40-60 °C), 10:90] 0.2; **max(CHCl3)/cm–1 1738 (CO); **H(400 MHz; CDCl3) 4.04 (1 H, t, *J* 5.4, CHOSi), 3.64 (3 H, s, OMe), 2.71 (1 H, qd, *J* 7.2 and 5.5, COC*H*Me), 1.78 (1 H, sepd, *J* 6.9 and 5.2, C*H*Me2), 1.13 (3 H, d, *J* 7.2, COCH*Me*), 1.07 (21 H, s, SiiPr3), 0.94 (3 H, d, *J* 6.9, CH*Me*AMeB) and 0.86 (3 H, d, *J* 6.9, CHMeA*Me*B); **C(100 MHz; CDCl3) 175.4+, 78.3–, 51.3–, 45.3–, 31.9–, 18.7–, 18.5–, 18.1–, 13.3–, 11.7– and 0.9–; *m*/*z* (ESI) 339.2 (100%, M+ + Na)(Found: M+ + Na, 339.2324. C17H36O3Si requires *M* + Na, 339.2331), and the *diene* **31** (3.1 mg, 79%) as an oil; *R*f[EtOAc-light petroleum (bp 40-60 °C), 10:90] 0.60; **max(CHCl3)/cm–1 1645 (C=C); **H(400 MHz; CDCl3) 5.32 (2 H, d, *J* 8.7, C=CH), 2.30-2.26 (2 H, m, 2  C*H*CH=), 1.77 (6 H, d, *J* 1.1, 2  C=CMe), 1.71-1.62 (8 H, m, 4  CH2) and 1.32-1.0 (12 H, m, 6  CH2); **C(100 MHz; CDCl3) 134.2+, 132.1–, 37.5–, 33.3+, 26.1+ and 14.1–; *m*/*z* (EI) 246.2 (100%, M+)(Found: M+ 246.2347. C18H30 requires *M*, 246.2347).

**(*E*)-1-Cyclohexyl-2,4-dimethylpent-1-en-3-ol**

Following Kishi,88 freshly distilled isobutyraldehyde (0.20 cm3,2.2 mmol), the vinyl iodide **29** (365 mg, 1.5 mmol), dry chromium(II) chloride (395 mg, 3.2 mmol) and a speck of pre-dried nickel(II) chloride in dimethyl sulfoxide (12.5 cm3) were mixed under argon in a glove box., and stirred at room temperature for 21 h. The mixture was cooled to 0 °C, quenched with water (20 cm3) and stirred for 10 min. The solution was extracted with ethyl acetate (3  15 cm3), and the combined organic fractions washed with brine (20 cm3), dried (MgSO4), and evaporated under reduced pressure to give a pale yellow liquid. Chromatography (SiO2, CH2Cl2) gave the *alcohol* (250 mg, 87%) as an oil; *R*f(CH2Cl2) 0.35; *v*max(film)/cm–1 3384 (br, OH) and 1651 (C=C); **H(250 MHz; CDCl3) 5.18 (1 H, d, *J* 9.0, C=CH), 3.54 (1 H, dd, *J* 8.2 and 3.1, C*H*OH), 2.20 (1 H, m, C=CHC*H*), 1.70 (5 H, m), 1.59 (3 H, d, *J* 1.3, MeC=), 1.32-1.05 (6 H, m), 0.97 (3 H, d, *J* 6.6, CH*Me*AMeB) and 0.77 (3 H, d, *J* 6.8, CHMeA*Me*B); **C(100 MHz; CDCl3) 134.5+, 133.8–, 84.1–, 36.6–, 33.0+, 31.1–, 26.1+, 26.0+, 19.4–, 18.6– and 11.3–; *m*/*z* (EI) 196 (15%, M+), and 153 (100, M – Me2CH)(Found: M+, 196.1840. C13H24O requires *M*, 196.1827).

**(*E*)-1-Cyclohexyl-2,4-dimethylpent-1-en-3-yl *N*-phenylcarbamate 43**

Phenyl isocyanate (0.12 cm3, 1.10 mmol), (*E*)-1-cyclohexyl-2,4-dimethylpent-1-en-3-ol (223 mg, 1.14 mmol), 4-dimethylaminopyridine (139 mg, 1.14 mmol) and triethylamine (0.17 cm3, 1.23 mmol) were stirred in dry dichloromethane (5 cm3) under argon at room temperature for 4 h. Water (5 cm3) was added and the mixture was extracted with dichloromethane (3  10 cm3). The combined organic fractions were washed with hydrochloric acid (1 mol dm–3, 5 cm3), brine (10 cm3), dried (MgSO4), and evaporated under reduced pressure. Chromatography (SiO2, CH2Cl2) gave the *carbamate* (217 mg, 60 %) as an oil; *R*f(CH2Cl2) 0.66; *v*max(film)/cm–1 3343 (NH), 1701 (C=O) and 1601 (C=C); **H(250 MHz; CDCl3) 7.39 (2 H, d, *J* 8.3, *o*-Ph), 7.30 (2 H, t, *J* 7.4, *m*-Ph), 7.04 (1 H, tt, *J* 7.2 and 1.6, *p*-Ph), 6.56 (1 H, br s, NH), 5.31 (1 H, d, *J* 8.7, C=CH), 4.78 (1 H, d, *J* 8.7, CHO), 2.17 (1 H, m, C=CHC*H*), 1.92 (1 H, octet, *J* 6.7, Me2C*H*), 1.65 (4 H, m, 2  CH2), 1.62 (3 H, d, *J* 1.3, *Me*C=CH), 1.36-1.01 (6 H, m, 3  CH2), 0.96 (3 H, d, CH*Me*AMeB) and 0.83 (3 H, d, *J* 6.8, CHMeA*Me*B); **C(100 MHz; CDCl3) 202.0, 138.2, 135.8, 130.2, 129.0, 123.1, 118.5, 85.9, 36.7, 32.8, 29.7, 26.1, 25.9, 19.1, 18.7 and 12.0; *m*/*z* (EI) 315 (1%, M+) and 179 (34, M – PhNHCO2)(Found: M+, 315.2177. C20H29NO2 requires *M*, 315.2198). This compound was recovered unchanged from several attempts to persuade it to react with the silylcuprate reagent, whether assembled on the carbamate function or added as an already formed reagent.

**(*E*)-1-Cyclohexyl-3-(2,2-dimethyl-1,1,2-triphenyldisilanyloxy)-2,4-dimethylpent-1-ene-3-ol 44**

(*E*)-1-Cyclohexyl-2,4-dimethylpent-1-en-3-ol (45 mg, 0.23 mmol), 1-chloro-2,2-dimethyl-1,1,2-triphenyldisilane (94 mg, 0.27 mmol) and imidazole (30.4 mg, 0.44 mmol) in DMF (1 cm3) were heated at 50 °C for 12 h. Saturated sodium bicarbonate solution and ether (5 cm3) were added, and the layers were separated. The aqueous layer was extracted with ether (2  5 cm3). The organic combined layers were washed with brine (5 cm3), dried (MgSO4) and evaporated under reduced pressure. The residue was chromatographed [SiO2, EtOAc-light petroleum (bp 40-60 °C), 2:98] to give the *silyl* *ether* (83 mg, 70%) as an oil; *R*f[EtOAc-light petroleum (bp 40-60 °C), 2:98] 0.3; **H(250 MHz; CDCl3) 7.51-7.23 (15 H, m, 3 Ph), 4.85 (1 H, d, *J* 8.9, C=CH), 3.61 (1 H, d, *J* 8.0, CHOSi), 2.03-1.94 (1 H, m, cyclohexyl CH), 1.78-1.41 (4 H, m, 2  CH2), 1.41 (3 H, s, C=CMe), 1.30-1.17 (6 H, m, 3  CH2), 0.91 (1 H, partially obscured m, C*H*Me2), 0.82 (3 H, d, *J* 6.6, CH*Me*AMeB), 0.62 (3 H, d, *J* 6.8, CHMeA*Me*B), 0.46 (3 H, s, Si*Me*AMeB) and 0.43 (3 H, s, SiMeA*Me*B); **C(100 MHz; CDCl3) 138.7+, 137.0–, 136.9+, 135.4+, 135.2–, 134.4–, 134.2–, 133.9+, 133.7–, 133.0–, 130.0–, 129.4–, 128.5–, 127.9–, 127.7–, 127.6–, 127.4–, 86.3–, 36.4–, 32.8+, 32.5+, 32.4–, 26.1+, 25.9+, 25.9+, 19.5–, 19.0–, 11.5–, –2.5– and –2.6–; *m*/*z* (EI) 377.2 (85%, M+ – SiMe2Ph) and 469.3 (30%, M+ – C3H7)(Found: M+ – SiMe2Ph, 377.2302 and M+ – C3H7, 469.2379. C33H44OSi2 requires *M* – SiMe2Ph, 377.2301 and *M* – C3H7, 469.2383). This compound was recovered unchanged from several attempts to persuade it to transfer the dimethyl(phenyl)silyl group to the allylic position using Ito’s conditions.

**(*3RS*,4*E*,6*RS*,7*RS*)-7-(*tert*-Butyldimethylsilyloxy)-2,4,6,8-tetramethyl-non-4-ene-3-ol (±)-45**

Similarly to the Nozaki-Hiyama-Kishi coupling used to prepare (*E*)-1-cyclohexyl-2,4-dimethylpent-1-en-3-ol described above, the vinyl iodide (±)-**24** (641 mg, 1.7 mmol) and isobutyraldehyde (1.49 cm3, 16.7 mmol), with workup and chromatography (SiO2, CH2Cl2), gave the *alcohol* (464 mg, 85%); **max (film)/cm–1 3520 (OH); **H(250 MHz; CDCl3) 5.21 (1 H, d, *J* 10.0, C=CH), 3.55 (1 H, d, *J* 3.6, Me2C*H*OH), 3.24 (1 H, dd, *J* 7.1 and 2.9, CHOSi), 2.55 (1 H, m, C*H*Me), 1.74 (1 H, m, C*H*Me), 1.60 (3 H, s, C=CMe), 0.98 (3 H, d, *J* 7.1, CH*Me*), 0.93 (9 H, s, tBu), 0.92 (3 H, d, *J* 7.1, CH*Me*), 0.89 (3 H, d, *J* 7.0, CH*Me*), 0.82 (3 H, d, *J* 6.7, CH*Me*), 0.78 (3 H, d, *J* 6.8, CH*Me*), 0.06 (3 H, s, Si*Me*AMeB) and 0.50 (3 H, s, SiMeA*Me*B); *m*/*z* (ESI) 351.3 (100%, M+ + Na)(Found: M+ + Na, 351.2691. C19H40O2Si requires *M* + Na, 351.2698).

**(3*RS*,4*RS*,7*RS* and 7*SR*)-3-(*tert*-Butyldimethylsilyloxy)-2,4,6,8-tetramethyl-7-phenylthio-non-5-ene and (3*RS*,4*RS*,5*RS* and 5*SR*)-3-(*tert*-butyldimethylsilyloxy)-2,4,6,8-tetramethyl-5-phenylthio-non-6-ene (±)-46**

Following Cohen and Guo,89 diphenyl disulfide (1.07 g, 4.914 mmol) and tri-n-butylphosphine (1.62 cm3, 6.55 mmol) were mixed in pyridine (1.5 cm3) at room temperature, and then kept at 70 °C for 30 min. The alcohol (±)-**45** (273 mg, 0.819 mmol) was added, and the mixture was stirred at 70 °C for 7 h. The mixture was cooled to room temperature, ether (5 cm3) and aqueous sodium hydroxide (5 cm3, 10%) were added, and the mixture was stirred vigorously. The aqueous layer was extracted with ether (2  5 cm3). The combined organic layers were washed with brine (1  10 cm3), dried (MgSO4) and evaporated under reduced pressure. The residue was chromatographed (SiO2, pentane) to give the *allylsulfides* (1.64 g, 80%) as an oil; **H(250 MHz; CDCl3) broadly defined signals 7.35-7.17 (ArH), 4.84-4.73 (several doublets, C=CH), 3.62-2.94 (several doublets and double doublets, C*H*OSi and CHS), 2.41-2.60 (m), 1.96-1.78 (m), 1.63-1.56 (several fine doublets, C=CMe), 1.19-0.67 (several doublets), 0.02-–0.01 (several singlets); *m*/*z* (ESI) 443.3 (100%, M+ + Na)(Found: M+ + Na, 443.2781. C25H44OSSi requires *M* + Na, 443.2780).

**(3*RS*,4*RS*,7*RS* and 7*SR*)-3-Hydroxy-2,4,6,8-tetramethyl-7-phenylthionon-5-ene and (3*RS*,4*RS*,5*RS* and 5*SR*)-3-hydroxy-2,4,6,8-tetramethyl-5-phenylthionon-6-ene**

The allylsulfides (100 mg, 0.24 mmol) and tetrabutylammonium fluoride (1 mol dm–3 solution in THF, 0.48 cm3, 0.48 mmol) were stirred in THF (5 cm3) at room temperature for 3 h. Ether (5 cm3) and water (8 cm3) were added, and the layers were separated. The aqueous layer was extracted with ether (2  8 cm3). The combined organic layers were washed with brine (1  10 cm3), dried (MgSO4) and evaporated under reduced pressure. The residue was chromatographed [SiO2, ether-light petroleum (bp 40-60 °C), 10:90] to give the *alcohols* (61 mg, 83%) as an oil; **H(250 MHz; CDCl3) broadly defined signals 7.37-7.18 (ArH), 4.88-4.77 (several doublets, C=CH), 3.76-2.70 (several doublets and double doublets, C*H*OH and CHS), 2.43-2.25 (m, C*H*Me), 1.92-1.82 (m', C*H*Me), 1.62-1.59 (several fine doublets, C=CMe) and 1.21-0.80 (several doublets, CH*Me*); *m*/*z* (EI) 306.2 (80%, M+), 153 (55%, M+ – SPh, –iPr), 167 (100%, M+ – SPh, – 2Me), 181 (55%, M+ –SPh, –OH) and 217 (5%, M+–2iPr).

**(3*RS*,4*RS*,7*RS* and 7*SR*)-3-Trimethylsilyloxy-2,4,6,8-tetramethyl-7-phenylthionon-5-ene and (3*RS*,4*RS*,5*RS* and 5*SR*)-3-trimethylsilyloxy-2,4,6,8-tetramethyl-5-phenylthionon-6-ene (±)-47**

The mixture of alcohols (40 mg, 0.129 mmol), *N*-(trimethylsilyl)imidazole (0.0378 cm3, 0.258 mmol) and tetrabutylammonium fluoride (1 mol dm–3 in THF, 2.58 l, 2.58 mol) were kept in dry DMF (0.5 cm3) at room temperature for 30 min. The solution was transferred onto a silica column and eluted with light petroleum (bp 40-60 °C) to give the *trimethylsilyl* *ethers* (49 mg, 100%) as an oil; **H(250 MHz; CDCl3) broadly defined signals 7.32-7.19 (ArH), 4.80-4.68 (several doublets, C=CH), 3.32-2.96 (several doublets and double doublets, CHOSi and CHS), 2.4-2.27 (m, C*H*Me), 1.93-1.78 (m, C*H*Me), 1.63-1.59 (several fine doublets, C=CMe), 1.20-0.49 (several doublets, CH*Me*) and 0.076 (s, OSiMe3); *m*/*z* (ESI) 401.2 (100%, M+ + Na)(Found: M+ + Na, 401.2313. C22H38OSSi requires *M* + Na, 401.2310).

**(3*RS*,4*RS*,5*RS* and 5*SR*)-2,4,6,8-Tetramethyl-5-trimethylsilylnon-6-ene-3-ol (±)-48**

Lithium naphthalenide90 (0.17 mol dm–3 in THF, 4.2 cm3, 0.714 mmol) and the allylsulfides (90 mg, 0.238 mmol) were kept in THF (0.3 cm3) at –78 °C for 1 h. The reaction was quenched at –78 °C with saturated aqueous ammonium chloride solution (5 cm3). The layers were separated and the aqueous layer was extracted with ether (2  5 cm3). The combined organic layers were washed with brine (1  10 cm3), dried (MgSO4) and concentrated under reduced pressure. The residue was chromatographed [SiO2, ether-light petroleum (bp 40-60 °C), 5:95] to give the mixture of *allylsilanes* (62 mg, 96%) as an oil; **H(250 MHz; CDCl3) 4.94-4.88 (2  d, C=CH), 3.28-3.20 (m), 2.58-2.42 (m, C*H*Me), 2.10-1.97 (m, CHMe), 1.74-1.67 (m, Me3SiC*H*), 1.57-1.56 (2  d, C=CMe), 1.32-0.75 (several doublets, CH*Me*) and 0.46 (s, Me3Si); *m*/*z* (ESI) 293.2 (100%, M+ + Na)(Found: M+ + Na, 293.2274. C16H34OSi requires *M* + Na, 293.2277).

**[4-Isopropyl-2,5-dimethyl-(2-methylpropyl)-tetrahydrofuran-3-yl]trimethylsilane (±)-49**

The allylsilane (10 mg, 0.036 mmol) and trifluoroacetic acid (5.5 l, 0.72 mmol) were kept in deuterated chloroform (1 cm3) at room temperature for 30 min. The reaction was quenched with saturated aqueous sodium bicarbonate solution (1 cm3). The layers were separated and the aqueous layer was extracted with dichloromethane (2  1 cm3). The combined organic layers were washed with brine (1  2 cm3), dried (MgSO4) and evaporated under reduced pressure. The residue was chromatographed [SiO2, light petroleum (bp 40-60 °C)] to give the *tetrahydrofuran* (7.2 mg, 74%) as an oil; **H(250 MHz; CDCl3) 3.14 (1 H, dd, *J* 9.8 and 3.6, C*H*O), 2.17 (1 H, qd, *J* 7.3 and 3.6, C*H*Me), 1.84 (1 H, m, C*H*Me), 1.66 (1 H, m, C*H*AHBMe), 1.36-1.32 (1 H, m, CHA*H*BMe), 1.29 (3 H, s, Me, CMe), 1.25 (1 H, d, *J* 6.3, Me3SiC*H*), 0.99 (3 H, d, *J* 6.4, CH*Me*), 0.98 (3 H, d, *J* 6.4, CH*Me*), 0.91 (3 H, d, *J* 6.9, CH*Me*), 0.89 (3 H, d, *J* 6.6, CH*Me*), 0.83 (3 H, d, *J* 6.6, CH*Me*) and 0.11 (9 H, s, Me3Si); **C(63 MHz; CDCl3) 87.3–, 83.5+, 52.1+, 46.9–, 38.7–, 28.4–, 27.4–, 25.2–, 24.6–, 23.7–, 21.1–, 18.9–, 12.8– and 0.6–.

**(4*RS*,5*RS* and 5*SR*)-2,4,6,8-tetramethyl-5-trimethylsilyl-non-6-ene-3-one**

The alcohol (19 mg, 0.07 mmol) and the Dess-Martin periodinane (59 mg, 0.14 mmol) were kept in dry dichloromethane (0.7 cm3) at room temperature for 30 min. The solution was transferred onto a silica column, and eluted with ether-light petroleum (bp 40-60 °C)(2:98) to give the mixture of *ketones* (17 mg, 90%) as an oil; **H(250 MHz; CDCl3) 5.00-4.85 (2  dq, C=CH), 3.04-2.92 (2  dq, CHMe), 2.85-2.69 (2  sep, CHMe), 2.61-2.42 (m, C*H*Me), 1.78 (2  d, *J* 10.4, C*H*SiMe3), 1.54 (3 H, d, *J* 1.3, C=CMe), 1.17-0.88 (2  d, CH*Me*), 0.03 (s, Me3Si); *m*/*z* (ESI) 291.2 (100%, M+ + Na)(Found: M+ + Na, 291.2124. C16H32OSi requires *M* + Na, 291.2120).

**(4*RS*,5*E*)-2,4,6,8-Tetramethylnon-5-ene-3-one (±)-50**

The allylsilane (17 mg, 0.06 mmol) and trifluoroacetic acid (9.7 l, 0.13 mmol) were kept in deuterated chloroform (1 cm3) at room temperature for 30 min. The reaction was quenched with saturated aqueous sodium bicarbonate solution. The layers were separated and the aqueous layer was extracted with dichloromethane (2  1 cm3). The combined organic layers were washed with brine (1  5 cm3), dried (MgSO4) and evaporated under reduced pressure. The residue was chromatographed [SiO2, light petroleum (bp 40-60 °C)] to give the *alkene* (9.9 mg, 80%) as an oil; **H(500 MHz; CDCl3) 4.97 (1 H, d, *J* 9.8, C=CH), 3.55 (1 H, dq, *J* 9.8 and 6.8, C*H*MeCO), 2.74 (1 H, sep, *J* 6.9, COC*H*Me2), 1.88 (1 H, dd, *J* 13.0 and 7.0, C*H*AHBCMe2), 1.84 (1 H, dd, *J* 13.2 and 6.9, CHA*H*BCMe2), 1.75 (1 H, m, C*H*Me), 1.67 (3 H, s, C=CMe), 1.10 (3 H, d, *J* 6.7, CH*Me*), 1.07 (3 H, d, *J* 7.0, CH*Me*), 1.04 (3 H, d, *J* 6.7, CH*Me*), 0.84 (3 H, d, *J* 6.6, CH*Me*) and 0.82 (3 H, d, *J* 6.5, CH*Me*); **H(500 MHz; CDCl3) 217.0+, 137.2+, 125.2–, 49.4+, 44.7, 38.8–, 26.0–, 22.4–, 22.2–, 19.0–, 18.2–, 16.7– and 16.3–; *m*/*z* (EI) 196.2 (7%, M+)(Found: M+, 196.1836. C13H24O requires *M*, 196.1827).

**Diethyl 3-dimethyl(phenyl)silylpentan-1,5-dioate 53a**

n-Butyllithium (1.6 mol dm–3 solution in hexane, 32.5 cm3, 52 mmol, standardised by double titration91) was added dropwise at 0 °C to copper(I) cyanide (4.67 g, 52 mmol) covered with dry THF (110 cm3) under argon and the mixture stirred for 15 min at 0 °C. The silyllithium reagent (37 cm3 of a 1.4 mol dm–3 in THF, 52 mmol) was then added dropwise. The mixture was kept for a further 15 min at 0 °C and then cooled to –78 °C. Diethyl glutaconate (9.7 g, 52 mmol) in dry THF (10 cm3) was added dropwise over 30 min, the mixture allowed to warm to room temperature over 6 h, and then stirred overnight. Light petroleum (bp 40-60 °C)(150 cm3) and basic ammonium chloride solution (150 cm3) were added and the organic layer decanted. The aqueous phase was extracted with light petroleum (bp 40-60 °C) (3  150 cm3) and the combined organic layers washed with the basic ammonium chloride solution until the washing remained colourless. The organic layer was washed with brine (2  100 cm3), dried (Na2SO4) and concentrated under reduced pressure. The starting material was removed by distillation, and the residue chromatographed [SiO2, light petroleum (bp 40-60 °C)-EtOAc, 14:1] to give the *diethyl* *ester* (6.56 g, 39%, 75% based on unrecovered starting material); *R*f[light petroleum (bp 40-60 °C)-EtOAc, 5:1] 0.57; **max(film)/cm–1 3020 (CH), 1740 (C=O), 1600 (Ph), 1260 (SiMe2) and 1120 (SiPh); **H(250 MHz; CDCl3) 7.62-7.34 (5 H, m, Ph), 4.02 (4 H, q, *J* 7.0, 2  C*H*2Me), 2.40 (2 H, dd, *J* 15.8 and 5.6, C*H*AHBCHSiC*H*ACHB), 2.29 (2 H, dd, *J* 15.8 and 8.4, CHA*H*BCHSiCHA*H*B), 1.89 (1 H, m, CHSi), 1.20 (6 H, t, *J* 7, 2  CH2*Me*) and 0.31 (6 H, s, SiMe2); *m*/*z* (EI) 322 (4%, *M*+), 307 (25, *M* – Me), 277 (27, *M* – EtO), 245 (50, *M* – Ph), 235 (40, C5H11O) and 135 (100, PhMe2Si+)(Found: M+, 322.1587. C17H26O4Si requires *M*, 322.1574).

**Dimethyl 3-dimethyl(phenyl)silylpentan-1,5-dioate 53b**

**Method A.** Similarly, dimethyl glutaconate (10 g, 63.2 mmol) gave the *dimethyl* *ester* (5.8 g, 31%, 48% based on unrecovered starting material); *R*f[light petroleum (bp 40-60 °C)-EtOAc, 90:10] 0.31; **max(film)/cm–1 3040 (CH), 1730 CO), 1580 and 1430 (Ph), 1250 (SiMe2), 1200, 1110 (SiPh), 875 and 775 (SiMe2); **H(90 MHz; CDCl3) 7.5-7.1 (5 H, m, Ph), 3.52 (6 H, s, 2  CO2Me), 2.23 (4 H, m, C*H*2CHSiC*H*2), 1.83 (1 H, m, CHSi) and 0.25 (6 H, s, SiMe2); *m*/*z* (EI) 294 (2.35%, *M*+), 279 (13, *M* – Me), 221 (25, *M* – C3H5O2), 217 (23, *M* – Ph), 137 (7.5, PhMeSiOH+), 136 (15, PhMe2SiH+), 135 (100, PhMe2Si+) and 91 (10, C7H7+)(Found: M+, 294.1293. C15H22O4Si requires *M*, 294.1287).

**Method B.** Sodium (2.6 g, 113 mmol) was dissolved in dry methanol (220 cm3), the diethyl ester **53b** (6 g, 18.62 mmol) in dry methanol (30 cm3) was added, and the mixture was kept at room temperature under argon for 3 days. An aqueous work-up, followed by chromatography [SiO2, light petroleum (bp 40-60 °C)-EtOAc, 95:5] gave the dimethyl ester (4.23 g, 77%), identical (1H NMR) with the sample prepared by Method A.

**Method C.** Following Krapcho,92 dimethyl 2-methoxycarbonyl-3-dimethyl(phenyl)silyl-1,5-pentanedioate (see below) (6.7 g, 19 mmol) was stirred with dimethyl sulfoxide (8 cm3), water (0.8 cm3) and sodium chloride (0.6 g) under reflux at 130 °C for 48 h. The usual work-up with dichloromethane gave the ester as an oil (4.98 g, 89%) bp 80 °C at 1.5 mmHg, identical (TLC, 1H NMR) with the earlier samples.

**Diethyl (2*RS*,3*SR*)-2-methyl-3-dimethyl(phenyl)silylpentan-1,5-dioate 54a**

Lithium diisopropylamide (LDA) was prepared by mixing n-butyllithium (1.6 mol dm–3 solution in hexane, 9.31 cm3, 14.9 mmol) and freshly distilled diisopropylamine (2.1 cm3, 14.9 mmol) in dry THF (22 cm3) at 0 °C under argon and keeping the mixture at 0 °C for 30 min. The LDA was cooled to –78 °C, and the silyl ester **53a** (4 g, 12.4 mmol) in dry THF (20 cm3) added dropwise. The mixture was stirred at –78 °C for 1.5 h, and methyl iodide (1.94 cm3, 31 mmol) added. The mixture was warmed to room temperature over 3 h and kept overnight. Ether (30 cm3) and ammonium chloride solution (60 cm3) were added and the aqueous layer extracted with ether (3  120 cm3). The combined ether layers were washed with water (50 cm3) and brine (50 cm3), dried (Na2SO4) and the solvent evaporated under reduced pressure to give the *methylated* *ester* (4.0 g, 96%) contaminated with some of the *dimethylated* *product* **55a**; *R*f[lightpetroleum (bp 40-60 °C)-EtOAc, 90:10] 0.55; **max(film)/cm–1 3070 (Ph), 1740 (CO2Et), 1250 (SiMe), 1200 (CO2Et), 1100 (SiPh), 820 and 775 (SiMe2); **(250 MHz; CDCl3) 7.59-7.21 (5 H, m, Ph), 4.02 (2 H, q, *J* 7, CO2C*H*2Me), 4.0 (2 H, q, *J* 7, CO2C*H*2Me), 2.62 (1 H, qd, *J* 7.0 and 4.05, CHSiC*H*Me), 2.4 (2 H, dd, *J* 15.5 and 6.5, C*H*2CHSi), 2.0 (1 H, m, CHSi), 1.21 (3 H, t, *J* 7.0, CO2CH2*Me*), 1.2 (3 H, t, *J* 7.0, CO2CH2*Me*), 1.03 (3 H, d, *J* 7, CH*Me*), 0.34 (3 H, s, Si*Me*AMeB) and 0.33 (3 H, s, SiMeA*Me*B); *m*/*z* (EI) 336 (0.49%, *M*+), 321 (9, *M* – Me), 307 (8, *M* – Et), 263 (7.5, *M* – COOEt), 259 (12, *M* – Ph), 235 (25, *M* – C5H9O2), 137 (21, PhMeSiOH+), 136 (15, PhMe2SiH+), 135 (100, PhMe2Si+), 91 (16, C7H7+) and 77 (6, Ph)(Found: M+, 336.1786. C18H28O4Si requires *M*, 336.1757). The crude product was used without further purification.

**Dimethyl (2*RS*,3*SR*)-2-methyl-3-dimethyl(phenyl)silylpentan-1,5-dioate 54b**

Similarly, the dimethyl ester **53b** (5.42 g, 18.41 mmol) gave the *methylated* *ester* (5.62 g, 97%); *R*f[lightpetroleum (bp 40-60 °C)-EtOAc, 90:10] 0.34; **max(film)/cm–1 3070 (Ph), 1740 (CO2Me), 1250 (SiMe), 1200 (CO2Me), 1110 (SiPh), 820 and 775 (SiMe2); **H(250 MHz; CDCl3) 7.59-7.31 (5 H, m, Ph), 3.57 (3 H, s, CO2Me), 3.55 (3 H, s, CO2Me), 2.65 (1 H, qd, *J* 7.15 and 3.8, CHSiC*H*Me), 2.40 (2 H, dd, *J* 15.0 and 6.1, C*H*2CHSi), 2.0 (1 H, m, CHSi), 1.05 (3 H, d, *J* 7.15, CHSiCH*Me*), 0.34 (3 H, s, Si*Me*AMeB) and 0.33 (3 H, s, SiMeA*Me*B); *m*/*z* (EI) 308 (3.64%, *M*+), 293 (18, *M* – Me), 231 (28, *M* – Ph), 221 (31, *M* – C4H7O2), 137 (17, PhMeSiOH+), 136 (17, PhMe2SiH+), 135 (100, PhMeSi+), 91 (13, C7H7+) and 59 (17, CO2Me)(Found: M+, 308.1439. C16H24O4Si requires *M*, 308.1443).

**Diethyl (2*RS*,3*SR*,4*SR*)-2,4-dimethyl-3-dimethyl(phenyl)silylpentan-1,5-dioate 55a**

LDA (24 mmol) was made as described above and the mono-methylated diethyl ester (6 g, 17.8 mmol) in dry THF (220 cm3) was added slowly at –78 °C, and the mixture kept for 1.5 h. Methyl iodide (4.5 cm3, 72 mmol) was added at –78 °C, the mixture warmed to room temperature and kept for 24 h. The reaction was worked up as before, and the product chromatographed [light petroleum (bp 40-60 °C)-EtOAc, 95:5] to give the *diethyl* *ester* (4.87 g, 78%) as an oil; *R*f[lightpetroleum (bp 40-60 °C)-EtOAc, 90:10] 0.59; **max(CH2Cl2)/cm–1 3070 (Ph), 1740 (CO2R), 1250 (SiMe2), 1200 (CO2R), 1130 (CO2R), 1100 (SiPh), 815 and 775 (SiMe2); **H(90 MHz; CDCl3) 7.65-7.2 (5 H, m, Ph), 3.92 (4 H, q, *J* 7.5, 2  OC*H*2Me), 2.63 (2 H, qd, *J* 6.9 and 4.5, 2  CHSiC*H*Me), 1.87 (1 H, t, *J* 4.5, CHSi), 1.12 (6 H, t, *J* 7.5, 2  OCH2*Me*), 1.05 (6 H, d, *J* 6.9, 2  CHSiCH*Me*) and 0.45 (6 H, s, SiMe2); *m*/*z* (EI) 350 (1.57%, *M*+), 335 (24, *M* – Me), 273 (58, *M* – Ph), 249 (75, *M* – C5H9O2), 137 (22, PhMeSiOH+), 136 (14, PhMe2SiH+), 135 (88, PhMe2Si+), 91 (67, C7H7+), 77 (20, Ph) and 69 (100, C5H9+)(Found: M+, 350.1906. C19H30O4Si requires *M*, 350.1913). Signals in the region ** 1.10 indicated that this material was contaminated with 12% of the other diastereoisomer **56a**.

**Dimethyl (2*RS*,3*SR*,4*SR*)-2,4-dimethyl-3-dimethyl(phenyl)silylpentan-1,5-dioate 51**

Similarly, the dimethyl ester **54b** gave the *dimethyl* *ester* (60%, contaminated with 12% of the other diastereoisomer **56b**). Careful chromatography [SiO2, light petroleum (bp 40-60 °C)-EtOAc, 95:5] gave a pure sample of the ester **51**; *R*f[lightpetroleum (bp 40-60 °C)-EtOAc, 90:10] 0.41; **max(CH2Cl2)/cm–1 3070 (Ph), 1740 (CO2Me), 1250 (SiMe2), 1200 (CO2Me), 1100 (SiPh), 815 and 775 (SiMe2); **H(250 MHz; CDCl3) 7.61-7.3 (5 H, m, Ph), 3.53 (6 H, s, 2  CO2Me), 2.71 (2 H, dq, *J* 5.3 and 7.0, 2  CHSiC*H*Me), 1.96 (1 H, t, *J* 5.3, CHSi), 1.10 (6 H, d, *J* 7.0, 2  CHSiCH*Me*), 0.38 (6 H, s, SiMe2); **C(100 MHz; CDCl3) 177.2, 138.6, 134.1, 129.0, 127.7, 51.6, 38.5, 31.8, 16.0 and –2.0; *m*/*z* (EI) 322 (1.33%, *M*+), 307 (14, *M* – Me), 245 (17, *M* – Ph), 235 (49, *M* – C4H9O2), 137 (5, PhMeSiOH+), 136 (10, PhMe2SiH+), 135 (73, PhMe2Si+), 91 (10, C7H7+), 69 (100, C5H9+) and 59 (10, CO2Me)(Found: M+, 322.1629. C17H26O4Si requires *M*, 322.1600), and a pure sample of *dimethyl* (2RS,4RS)-2,4-*dimethyl*-3-*dimethyl*(*phenyl*)*silylpentan*-1,5-*dioate* **56b**; *R*f[light petroleum (bp 40-60 °C)-EtOAc, 90:10] 0.40; **max(CH2Cl2) 3100 (Ph), 1720 (CO2Me), 1200 (CO2Me), and 1150 (CO2Me), 1250 (SiMe2), 1100 (SiPh), 835 and 810 (SiMe2); **H(250 MHz; CDCl3) 7.59-7.29 (5 H, m, Ph), 3.58 (3 H, s, CO2Me), 3.49 (3 H, s, CO2Me), 2.78 (1 H, dq, *J* 7.3 and 8.0, CHSiC*H*Me), 2.59 (1 H, qd, *J* 8.0 and 5.2, CHSiC*H*Me), 2.04 (1 H, dd, *J* 7.3 and 5.2, CHSi), 1.13 (6 H, 2  d, *J* 8.0, 2  CH*Me*), 0.37 (3 H, s, Si*Me*AMeB) and 0.36 (3 H, s, SiMeA*Me*B); **C(100 MHz; CDCl3) 176.6, 176.5, 138.6, 133.9, 129.06, 127.7, 51.43, 51.40, 39.1, 38.3, 31.9, 17.0, 15.3, –1.6 and –1.7; *m*/*z* (EI) 322 (0.53%, *M*+), 307 (17, *M* – Me), 245 (30, *M* – Ph), 235 (63, *M* – C4H7O2), 137 (5, PhMeSiOH+), 136 (13, PhMe2SiH+), 135 (70, PhMe2Si+), 91 (67, C7H7+), 69 (100, C5H9+) and 59 (5, CO2Me)(Found: M+, 322.1606. C17H26O4Si requires *M*, 322.1601).

**Dimethyl (2*RS*,3*RS*,4*SR*)-3-hydroxy-2,4-dimethylpentan-1,5-dioate 57**

**Method A:** The diester **51** (0.23 g, 0.7 mmol) and the boron trifluoride-acetic acid complex (0.2 cm3, 1.4 mmol) were kept in dichloromethane (15 cm3) under nitrogen at room temperature for 19 h. Saturated sodium bicarbonate solution (5 cm3) and ether (50 cm3) were added, and the layers separated. The organic layer was washed with sodium bicarbonate solution, and brine, dried (MgSO4) and concentrated under reduced pressure to give the fluorosilane (0.2 g); **H90 MHz; CDCl3) 3.67 (6 H, s, 2  CO2Me), 2.81 (2 H, m, C*H*CO), 1.40 (1 H, m, CHSi), 1.17 (6 H, d, *J* 8.0, 2  CH*Me*) and 0.25 (6 H, d, *J* 7.0, SiMe2). Peracetic acid (40% solution in acetic acid, 2 cm3, 18.3 mmol) and triethylamine (0.1 cm3) were added, and the mixture kept at room temperature for 22 h. Ether (500 cm3) was added and the mixture washed with sodium thiosulfate solution (3  75 cm3) and sodium bicarbonate solution (2  100 cm3). The combined organic layers were dried (MgSO4) and concentrated under reduced pressure, and the residue chromatographed [SiO2, light petroleum (bp 40-60 °C)-EtOAc, 95:5] to give the alcohol37 (14 mg, 96%); *R*f[light petroleum (bp 40-60 °C)-EtOAc, 50:50] 0.5; **max(film)/cm–1 3550 (OH) and 1745 (CO); **H90 MHz; CDCl3) 3.71 (6 H, s, 2  CO2Me), 3.69 (1 H, t, *J* 6.1, C*H*OH), 2.64 (2 H, dq, *J* 7.1 and 6.1, 2  C*H*Me) and 1.24 (6 H, d, *J* 7.2, 2  CH*Me*); *m*/*z* (EI) 173 (4%, *M*+ – OMe), 155 (9, M – C2H3O2), 117 (35, M – C4H7O2) 88, (100, C4H8O2), 85 (44, C4H5O2) and 57 (69, C3H9)(Found: M+ – OMe, 173.0816. C9H16O5 requires *M* – OMe, 173.0814).

**Method B:** Peracetic acid (32% solution in acetic acid, 28 cm3, 18.3 mmol) was added dropwise, with cooling to the diester **60** (1 g, 3 mmol), potassium bromide (0.43 g, 5.1 mmol) and anhydrous sodium acetate (0.8 g, 12 mmol) in glacial acetic acid (8 cm3), and the mixture kept for 1 h at room temperature. The mixture was poured into aqueous sodium hydrogen sulphite, and extracted with ether. The organic layer was washed successively with sodium carbonate solution, water and brine, and dried (MgSO4). The solvent was distilled off under reduced pressure and the residue chromatographed (SiO2, hexane-EtOAc, 3:1) to give the alcohol (171 mg, 28%), identical (TLC, 1H NMR) with the earlier sample.

**Dimethyl 2-methoxycarbonyl-3-dimethyl(phenyl)silylpentan-1,5-dioate**

Following Michael and Ross,93 freshly distilled dimethyl malonate (5.94 g, 3.9 cm3, 45 mmol) was added to sodium (1 g, 40 mmol) in dry methanol (45 cm3) at room temperature, followed by methyl (*E*)-3-dimethyl(phenyl)silylpropenoate94,95 **58** (Ar = Ph)(8.8 g, 40 mmol). The mixture was refluxed for 6 h and then cooled, and dilute hydrochloric acid was added. The excess methanol was evaporated off, water was added to the residue, and the mixture extracted with dichloromethane, which was dried (MgSO4) and concentrated under reduced pressure. Chromatography [SiO2, light petroleum (bp 40-60 °C)-CH2Cl2, 1:1] gave the *triester* (9.5 g, 68%) as an oil; *R*f[light petroleum (bp 40-60 °C)-CH2Cl2, 1:1] 0.07; **(400 MHz; CDCl3 7.25-7.53 (5 H, m, Ph), 3.61 (3 H, s, CO2Me), 3.60 (3 H, s, CO2Me), 3.57 [1 H, d, *J* 5.8, C*H*(CO2Me)], 3.56 (3 H, s, CO2Me), 2.57 (1 H, dd, *J* 17.4 and 7.5, COC*H*AHB), 2.50 (1 H, dd, *J* 17.1 and 6.3, COCHA*H*B), 2.23 (1 H, overlapping td, *J* 6.8 and 6.2, CHSi), 0.34 (3 H, s, Si*Me*AMeB) and 0.33 (3 H, s, SiMeA*Me*B); *m*/*z* (EI) 353 (18%, M+ + H), 337 (26, M – Me), 321 (13, M – OMe), 275 (100, M – Ph) and 135 (95, PhMe2Si+)(Found: M+ + H, 353.1422. C17H24O6Si requires *M* + H, 353.1420).

**Dimethyl 2-methoxycarbonyl-3-dimethyl(4-tolyl)silylpentan-1,5-dioate**

Similarly, methyl 3-dimethyl(4-tolyl)silylpropenoate94 **58** (R = *p*-MeC6H4)(11.8 g, 50.4 mmol) and dimethyl malonate gave the *triester* (16.3 g, 88%) as an oil; *R*f[light petroleum (bp 40-60 °C)-EtOAc, 3:1] 0.01; **H(250 MHz; CDCl3) 7.41 (2 H, d, *J* 7.7, ArH), 7.14 (2 H, d, *J* 7.7, ArH), 3.58 (6 H, s, 2  CO2Me), 3.54 [4 H, s, CO2*Me* and C*H*(CO2Me)2], 2.52 (2 H, m, CH2), 2.30 (3 H, s, Ar*Me*), 2.22 (1 H, m, CHSi), 0.30 (3 H, s, Si*Me*AMeB) and 0.28 (3 H, s, SiMeA*Me*B); *m*/*z* (EI) 351 (22%, M – Me), 275 (35, M – MeC6H4), 221 [35, M – C(CO2Me)2], 219 [38, M – CH2(CO2Me)2], 149 (100, MeC6H4Si+) and 91 (13, MeC6H4+)(Found: M – Me, 351.1258. C18H26O6Si requires *M* – Me, 351.1264).

**Dimethyl 3-dimethyl(4-tolyl)silylpentan-1,5-dioate 59**

Krapcho demethoxycarbonylation of methyl 2-methoxycarbonyl-3-dimethyl(4-tolyl)silyl-1,5-pentanedioate (11.27 g, 31 mmol), similar to Method C in the preparation of the diester **53b**, gave the *diester* (8.5 g, 89%) as an oil; *R*f(hexane) 0.04; **H(250 MHz; CDCl3) 7.40 (2 H, d, *J* 7.8, ArH), 7.17 (2 H, d, *J* 7.8, ArH), 3.58 (6 H, s, 2  CO2Me), 2.41 (2 H, dd, *J* 15.7 and 5.3, 2 C*H*AHB), 2.34 (3 H, s, Ar*Me*), 2.26 (2 H, dd, *J* 15.7 and 8.8, 2 CHA*H*B), 1.86 (1 H, tt, *J* 8.8 and 5.3, SiCH) and 0.29 (6 H, s, SiMe2); *m*/*z* (EI) 293 (12%, M – Me), 217 (13, M – MeC6H4) and 149 (100, MeC6H4Si+)(Found: M – Me, 293.1236. C16H24O4Si requires *M* – Me, 293.1131).

**Dimethyl (2*RS*,3*SR*)-2-methyl-3-dimethyl(4-tolyl)silylpentan-1,5-dioate**

Methylation of the diester **59** (8.5 g, 27.6 mmol) in the same way as the dimethyl(phenyl)silyl analogue gave the *monomethylated* *diester* (7.9 g, 89%) as an oil; *R*f[light petroleum (bp 40-60 °C)-EtOAc, 95:5] 0.11; **H(250 MHz; CDCl3) 7.41 (2 H, d, *J* 7.7, ArH), 7.17 (2 H, d, *J* 7.7, ArH), 3.57 (3 H, s, CO2Me), 3.56 (3 H, s, CO2Me), 2.64 (1 H, qd, *J* 7.1 and 3.4, C*H*Me), 2.44 (1 H, dd, *J* 16.3 and 8.5, C*H*AHB), 2.33 (3 H, s, Ar*Me*), 2.33 (1 H, dd, *J* 16.2 and 5.6, CHA*H*B), 1.98 (1 H, ddd, *J* 8.9, 5.5 and 3.7, SiCH), 1.03 (3 H, d, *J* 7.1, CH*Me*), 0.32 (3 H, s, Si*Me*AMeB) and 0.31 (3 H, s, SiMeA*Me*B); *m*/*z* (EI) 322 (0.25%, M+), 321 (0.5, M – H), 307 (11, M – Me), 291 (3, M – OMe), 249 (5, M – CH2CO2Me), 231 (19, M – MeC6H4) and 149 (100, MeC6H4Si+)(Found: M – H, 321.1496. C17H26O4Si requires *M* – H, 321.1522).

**Dimethyl (2*RS*,3*SR*,4*SR*)-2,4-dimethyl-3-dimethyl(4-tolyl)silylpentan-1,5-dioate 60**

The second methylation of the monomethylated diester (6.0 g, 18.8 mmol), in the same way as for the dimethyl(phenyl)silyl analogue **54**, gave the mixture of esters (5.4 g, 85%) in a ratio of 85:15 as an oil. Careful chromatography [SiO2, light petroleum (bp 40-60 °C)-EtOAc, 95:5] gave samples of the major *dimethylated* *ester* **60**; *R*f[light petroleum (bp 40-60 °C)-EtOAc, 95:5] 0.12; **H(250 MHz; CDCl3) 7.43 (2 H, d, *J* 7.7, ArH), 7.16 (2 H, d, *J* 7.7, ArH), 3.54 (6 H, s, 2  CO2Me), 2.70 (1 H, qd, *J* 7.2 and 5.3, 2  C*H*Me), 2.33 (3 H, s, Ar*Me*), 1.96 (1 H, t, *J* 5.3, SiCH), 1.09 (6 H, d, *J* 7.2, 2  CH*Me* ) and 0.35 (6 H, s, SiMe2); *m*/*z* (EI) 335 (0.55%, M – H), 321 (16, M – Me), 245 (36, M – MeC6H4), 149 (54, MeC6H4Me2Si+), 86 (62, CH2CHCO2Me+) and 84 (100, CH2CHCH2CO2+)(Found: M – H, 335.1691. C18H28O4Si requires *M* – H, 335.1757), and the minor dimethylated ester (2RS,4RS)-2,4-*dimethyl*-3-*dimethyl*(4-*tolyl*)*silylpentan*-1,5-*dioate*; *R*f[light petroleum (bp 40-60 °C)-EtOAc, 95:5] 0.04; **H(400 MHz; CDCl3) 7.41(2 H, d, *J* 7.8, ArH), 7.16 (2 H, d, *J* 7.8, ArH), 3.58 (3 H, s, CO2Me), 3.48 (3 H, s, CO2Me), 2.77 (1 H, m, C*H*MeA), 2.60 (1 H, qd, *J* 7.2 and 4.8, C*H*MeB), 2.33 (3 H, s, Ar*Me*), 2.02 (1 H, dd, *J* 7.6 and 4.8, CHSi), 1.123 (3 H, d, *J* 7.6, CH*Me*), 1.119 (3 H, d, *J* 7.2, CH*Me*), 0.350 (3 H, s, Si*Me*AMeB) and 0.347 (3 H, s, SiMeA*Me*B); *m*/*z* (EI) 321 (36%, M – Me), 305 (10, M – OMe), 245 (51, M – MeC6H4) and 149 (100, MeC6H4Me2Si+)(Found: M – Me, 321.1505. C18H28O4Si requires *M* – Me, 321.1600).

**(2*RS*,3*SR*,4*SR*)-2,4-Dimethyl-3-dimethyl(phenyl)silylpentan-1,5-dioic acid**

Lithium iodide monohydrate (13.85 g, 91 mmol) was dried over phosphorus pentoxide at 150 °C under reduced pressure (7 mmHg) for 1.5 h. The ester **51** (2 g, 6.2 mmol) in dry 2,6-lutidine (110 cm3) was added and the mixture refluxed under argon for 8 h. The mixture was cooled to room temperature and poured onto ice-water (120 cm3) and the resulting mixture extracted with ether (2  200 cm3). The combined ether layers were washed with hydrochloric acid solution (3 mol dm–3) and brine (2  200 cm3), dried (Na2SO4) and concentrated under reduced pressure. The aqueous layer was acidified to pH 2 with hydrochloric acid (3 mol dm–3) and extracted with ethyl acetate (4  200 cm3). The organic layer was washed with hydrochloric acid solution (3 mol dm–3, 2  70 cm3), sodium bisulfite solution, and brine (2  80 cm3), dried (Na2SO4) and concentrated under reduced pressure to give the *diacid* as prisms (1.32 g, 72%), mp 139.5-141 °C (from EtOAc); **max(CH2Cl2)/cm–1 3000-2400 (CO2H), 1705 (CO2H), 1250 (SiMe2), 1100 (SiPh), 840 (SiMe2) and 800 (SiMe2); **H(250 MHz; CDCl3) 11.65 (2 H, s, 2  CO2H), 7.6-7.34 (5 H, m, Ph), 2.76 (2 H, qd, *J* 7.5 and 3.1, 2  CHSiC*H*Me), 2.4 (1 H, t, *J* 3.1, CHSi), 1.26 (6 H, d, *J* 7.5, 2  CHSiCH*Me*) and 0.45 (6 H, s, SiMe2); **C(100 MHz; CDCl3) 183.6, 138.0, 134.0, 129.3, 127.7, 38.6, 31.4, 15.7 and –2.0; *m*/*z* (EI) 279 (10.55%, *M*+ – Me), 217 (43, *M* – Ph), 143 (100, C6H7O4+), 137 (48, PhMeSiOH+), 136 (15, PhMe2SiH+), 135 (98, PhMe2Si+), 91 (10, C7H7+), 77 (18, Ph) and 69 (37, C5H9+)(Found: C, 60.80; H, 7.59; M+ – Me, 279.1055. C15H22O4Si requires C, 61.18; H, 7.53% *M* – Me, 279.1053).

**(2*RS*,4*RS*)-2,4-Dimethyl-3-dimethyl(phenyl)silylpentan-1,5-dioic acid**

The same procedure as above using the ester **56b** gave the *diacid* (85%); **max(CH2Cl2)/cm–1 3300-2500 (CO2H), 1695 (CO2H), 1250 (SiMe2), 1100 (SiPh), 835 and 810 (SiMe2); **H(250 MHz; CDCl3) 12.15 (2 H, s, 2  COOH), 7.62-7.31 (5 H, m, Ph), 2.76 (2 H, m, 2  CHSiC*H*Me), 2.19 (1 H, dd, *J* 7.0 and 2.1, CHSi), 1.22 (3 H, d, 7.3, CHSiCH*Me*) and 1.16 (3 H, d, *J* 7.0, CHSiCH*Me*), 0.48 (3 H, s, Si*Me*AMeB) and 0.41 (3 H, s, SiMeA*Me*B); **C(100 MHz; CDCl3) 183.7, 183.2, 138.6, 133.6, 129.2, 128.1, 38.9, 37.1, 31.8, 16.4, 12.5, –1.0 and –2.0; *m*/*z* (EI) 279 (1.49%, *M*+ – Me), 217 (12.5, *M* – Me – Ph), 143 (52, C6H7O4+), 137 (27, PhMeSiOH+), 136 (17, PhMe2SiH+), 135 (100, PhMe2Si+), 77 (12.5, Ph) and 69 (20, C5H9+)(Found: M+ – Me, 279.1077. C15H22O4Si requires *M* – Me, 279.1052).

**(3*RS*,4*RS*,5*SR*)-Dihydro-3,5-dimethyl-4-dimethyl(phenyl)silyl-3*H*-pyran-2,6-dione**

The diacid (2 g, 4.1 mmol) in acetic anhydride (1.8 cm3, 19.1 mmol) was heated at 100 °C for 1.25 h. The acetic anhydride and the acetic acid produced were removed under reduced pressure. Ethyl acetate was added and the mixture concentrated to give the *anhydride* as prisms (1.13 g, 91%), mp 101-103 °C (from EtOAc); *R*f(CH2Cl2) 0.33, **max(CH2Cl2)/cm–1 1800 and 1750 (C=O), 1250 (SiMe2), 1100 (SiPh), 830 and 810 (SiMe2); **H(250 MHz; CDCl3) 7.52-7.36 (5 H, m, Ph), 2.97 (2 H, qd, *J* 7.3 and 5.5, 2  CHSiC*H*Me), 1.78 (1 H, t, *J* 5.5, CHSi), 1.27 (6 H, d, *J* 7.3, 2  CHSiCH*Me*) and 0.44 (6 H, s, SiMe2); **C(63 MHz; CDCl3) 170.6, 136.6, 133.6, 129.8, 128.3, 41.3, 29.7, 16.2 and –1.5; *m*/*z* (EI) 276 (0.05%, *M*+), 261 (12, *M* – Me), 204 (5, *M* – C2O3+), 161 (22, *M* – C5H7O3+), 143 (37, C7H9O3+), 137 (5, PhMeSiOH+), 136 (20, PhMe2SiH+) and 135 (100, PhMe2Si+)(Found: C, 64.65; H, 7.15; 276.117. C15H20O3Si requires C, 65.17; H, 7.29% *M*, 276.1182).

**(3*RS*,5*RS*)-Dihydro-3,5-dimethyl-4-dimethyl(phenyl)silyl-3*H*-pyran-2,6-dione**

The same procedure as above using the diastereoisomer of the diacid gave the (3RS,5RS)*-anhydride* as an oil (70% without purification); *R*f(CH2Cl2) 0.33; **max(CH2Cl2)/cm–1 1800 and 1750 (C=O), 1220 (SiMe2), 1100 (SiPh), 830 and 810 (SiMe2); **H(250 MHz; CDCl3) 7.54-7.33 (5 H, m, Ph), 2.93 (2 H, m, 2  CHSiC*H*Me), 1.47 (1 H, dd, *J* 4.52 and 4.49, CHSi), 1.33 (3 H, d, *J* 7.15, CHSiCH*Me*), 1.23 (3 H, d, *J* 7.3, CHSiCH*Me*) and 0.42 (6 H, s, SiMe2); **C(100 MHz; CDCl3) 183.8, 183.2, 138.6, 133.8, 129.2, 128.1, 38.9, 36.9, 31.7, 18.4, 12.4, –1.0 and –2.1; *m*/*z* (EI) 261 (0.7%, *M*+ – Me), 143 (60, C7H9O3+), 137 (30, PhMeSiOH+), 136 (15, PhMe2SiH+) and 135 (100, PhMe2Si+)(Found: M+ – Me, 261.0934. C15H20O3Si requires *M* – Me, 261.0947).

**(2*RS*,3*SR*,4*SR*)-4-(Methoxycarbonyl)-2-methyl-3-dimethyl(phenyl)silylpentanoic acid**

The meso anhydride (50 mg, 0.18 mmol) and quinuclidine (22 mg, 0.198 mmol) were stirred in methanol (2 cm3) at room temperature for 1.5 h. The methanol was distilled off under reduced pressure, and ethyl acetate (12 cm3) was added. The organic layer was washed with hydrochloric acid solution (3 mol dm–3, 2  3 cm3) and brine (1 cm3), dried (Na2SO4) and concentrated under reduced pressure. The residue was chromatographed (SiO2, Et2O) to give the *mono-ester* (52 mg, 94%) as an oil; *R*f(Et2O) 0.53; **max(CH2Cl2)/cm–1 3000-2400 (CO2H), 1740 (CO2Me), 1695 (CO2H), 1200 (SiMe2), 1110 (SiPh), 815 and 810 (SiMe2); **H(250 MHz; CDCl3) 10.78 (1 H, s, CO2H), 7.60-7.30 (5 H, m, Ph), 3.52 (3 H, s, CO2Me), 2.74 (2 H, m, 2  CHSiC*H*Me), 1.97 (1 H, dd, *J* 4.6 and 4.5, CHSi), 1.13 (3 H, d, *J* 7.15, CHSiCH*Me*), 1.12 (3 H, d, *J* 7.15, CHSiCH*Me*) and 0.39 (6 H, s, SiMe2); *m*/*z* (EI) 293 (9.06%, *M*+ – Me), 231 (36, *M* – Ph), 143 (36, C6H7O4+), 137 (30, PhMeSiOH+), 136 (13, PhMe2SiH+), 135 (90, PhMe2Si+), 91 (15, C7H7+), 69 (100, C5H9+) and 59 (11, CO2Me)(Found: M+ – Me, 293.1198. C16H24O4Si requires *M* – Me, 293.1209).

**(2*RS*,3*SR*,4*SR*)-4-(Benzyloxycarbonyl)-2-methyl-3-dimethyl(phenyl)silylpentanoic acid**

Similarly, the meso anhydride (65.3 mg, 0.237 mmol) and quinuclidine (30 mg, 0.27 mmol) in distilled benzyl alcohol (1.7 cm3) gave the *mono-ester* (83.1 mg, 91%) as an oil; *R*f(Et2O) 0.68; **max(CH2Cl2)/cm–1 3300-2500 (CO2H), 1735 (CO2R) and 1705 (CO2H); **H (250 MHz; CDCl3) 7.55-7.27 (10 H, m, SiPh and OCH2*Ph*), 4.95 (2 H, s, PhC*H*2O), 2.74 (2 H, m, 2  C*H*Me), 1.96 (1 H, dd, *J* 5.2 and 4.6, CHSi), 1.14 (3 H, d, *J* 7.15, CH*Me*ACHSiCHMeB) 1.09 (1 H, d, *J* 7.62, CHACHSiCH*Me*B), 0.392 (3 H, s, Si*Me*AMeB) and 0.388 (3 H, s, SiMeA*Me*B); **C(100 MHz; CDCl3) 182.5+, 176.5+, 138.6+, 135.9+, 134.1–, 129.0–, 128.5–, 128.1–, 127.7–, 65.9+, 38.8+, 38.3+, 31.8+, 16.4+, 15.7+, –1.8+ and –1.9+; *m*/*z* (EI) 369 (7, *M*+ – Me), 307 (7, *M* – Ph), 135 (39, PhMe2Si+) and 91 (100, C7H7+)(Found: M+ – Me, 369.1523. C22H28O4Si requires *M* – Me, 369.1523).

**Benzyl (2*RS*,3*SR*,4*SR*)-5-hydroxy-2,4-dimethyl-3-dimethyl(phenyl)silylpentanoate**

The mono benzyl ester (29.3 mg, 0.0763 mmol) and borane-THF complex (0.66 mol dm–3 solution in THF, 116 µl, 0.0763 mmol) in dry THF (0.35 cm3) were kept under argon at 0 °C for 1 h, and at room temperature for 2.5 h. More borane-THF (116 µl) was added and the mixture stirred at room temperature for a further 17 h. Brine (0.2 cm3) was added to the mixture at 0 °C, and the mixture extracted with ethyl acetate (3  5 cm3). The combined organic layers were washed with brine (2  4.5 cm3), dried (Na2SO4), concentrated under reduced pressure and the residue chromatographed to give the *alcohol* (15.8 mg, 56%); *R*f(MeOH-CH2Cl2, 96:4) 0.6; **max(film)/cm–1 3600 (OH), 1730 (C=O), 1110 (SiPh) and 820 (SiMe2); **H(250 MHz; CDCl3) 7.57-7.29 (10 H, m, Ph and SiPh), 5.05 (2 H, s, PhC*H*2O), 3.42 (1 H, dd, *J* 10.8 and 6.5, C*H*AHBOH), 3.33 (1 H, dd, *J* 10.8 and 6.5, CHA*H*BOH), 2.74 (1 H, qd, *J* 7.3 and 3.0, C*H*MeCO2Bn), 1.88 (1 H, m, MeC*H*CH2OH), 1.65 (1 H, dd, *J* 4.5 and 3.0, CHSi), 1.53 (1 H, br, OH), 1.2 (3 H, d, *J* 7.3, CH*Me*CO2Bn), 0.84 (3 H, d, *J* 7.0, CH*Me*CH2OH), 0.41 (3 H, s, Si*Me*AMeB) and 0.4 (3 H, s, SiMeA*Me*B); *m*/*z* (EI) 355 (0.36%, *M*+ – Me), 293 (21, *M* – Ph), 262 (1, lactone), 247 (18, C14H20O2Si+), 205 (17, C12H13O3+), 143 (20, C7H11O3+), 135 (100, PhMe2Si+) and 91 (95, C7H7+)(Found: M+ – Me, 355.1712. C22H30O3Si requires *M* – Me, 355.1730), contaminated with the lactone (88:12 ratio), into which it was slowly and spontaneously converted.

**(3*RS*,4*SR*,5*SR*)-Tetrahydro-3,5-dimethyl-4-dimethyl(phenyl)silylpyran-2-one**

The meso anhydride (15.8 mg, 0.057 mmol) and sodium borohydride (2.3 mg, 0.06 mmol) were mixed in dry THF (0.25 cm3) under argon at 0 °C, and stirred at room temperature for 1.8 h. Hydrochloric acid solution (3 mol dm–3, 0.05 cm3) was added cautiously with cooling (ice-bath), and the mixture was warmed to room temperature. The mixture was concentrated under reduced pressure, water (0.6 cm3) was added and the mixture was extracted with ether (3  10 cm3). The combined organic layers were dried (Na2SO4) and concentrated under reduced pressure. Flash chromatography [SiO2, light petroleum (bp 40-60 °C)-EtOAc, 50:50) gave the *lactone* (11.6 mg, 77%) as an oil; *R*f[lightpetroleum (bp 40-60 °C)-EtOAc, 50:50) 0.59; **max(CH2Cl2)/cm–1 1725 (C=O); **H(250 MHz; CDCl3) 7.53-7.34 (5 H, m, Ph), 4.31 (1 H, dd, *J* 11.1 and 4.7, OC*H*ACHBCHMe), 4.10 (1 H, dd, *J* 11.1 and 6.8, OCHAC*H*BCHMe), 2.82 (1 H, qd, *J* 7.7 and 4.4, O=CC*H*Me), 2.27 (1 H, m, OCH2C*H*Me), 1.73 (1 H, dd, *J* 6.8 and 4.4, CHSi), 1.33 (3 H, d, *J* 7.7, O=CCH*Me*), 1.02 (3 H, d, *J* 7.2, OCH2CH*Me*), 0.45 (3 H, s, Si*Me*AMeB) and 0.44 (3 H, s, SiMeA*Me*B); *m*/*z* (EI) (2.88%, *M*+), 247 (43, *M* – Me), 205 (39, *M* – C2O2H) and 135 (100, PhMe2Si+)(Found: M+, 262.1381. C15H22O2Si requires *M*, 262.1389).

**(2*RS*,4*RS*,3*RS*)-4-(Benzylcarbamoyl)-2-methyl-3-dimethyl(phenyl)silylpentanoic acid**

The meso anhydride (21.1 mg, 0.0764 mmol) and benzylamine (9.2 µl, 0.084 mmol) were kept in dry THF (0.3 cm3) at room temperature under argon for 0.5 h. Ethyl acetate (15 cm3) was added, and the organic layer was washed with hydrochloric acid solution (3 mol dm–3, 2  3 cm3) and brine (1 cm3), dried (Na2SO4) and concentrated under reduced pressure to give gave the *amido* *acid* (27.4 mg, 94%) as plates, mp 143.5-144 °C (from CH2Cl2-hexane); *R*f[EtOAc-light petroleum (bp 40-60 °C), 50:50] 0.38; **max(CH2Cl2)/cm–1 3420 (NH), 3100-2500 (CO2H), 1695 (CO2H), 1660 (CONH), 1500 (Ph), 1225 (SiMe2), 1100 (SiPh), 830 and 810 (SiMe2); **H(250 MHz; CDCl3) 7.57-7.16 (10 H, m, Ph), 5.34 (1 H, t, *J* 5.6, NH), 4.26 (2 H, d, *J* 5.6, NHC*H*2Ph), 2.84 (1 H, qd, *J* 7.3 and 3.0, MeC*H*CO2H), 2.48 (1 H, qd, *J* 7.3 and 5.2, MeC*H*CONH), 1.77 (1 H, dd, *J* 5.2 and 3.0, CHSi), 1.15 (6 H, d, *J* 7.3, 2  *Me*CH) and 0.44 (6 H, s, SiMe2); **C (100 MHz; CDCl3 + DMSO) 179.73, 176.41, 140.14, 138.38, 134.03, 128.62, 128.49, 127.76, 127.6, 127.24, 43.39, 40.4, 38.2, 33.07, 17.93, 15.64 and –1.49; *m*/*z* (EI) 383 (0.1%, *M*+), 368 (12, *M* – Me), 306 (22, *M* – Ph), 135 (31, PhMe2Si+), 106 (8, PhCH2NH+), 91 (100, C7H7+) and 78 (100, C6H6+)(Found: M+, 383.1892. C22H29NO3Si requires *M*, 383.1917).

**Methyl (2*RS*,3*SR*,4*SR*)-4-(benzylcarbamoyl)-2-methyl-3-dimethyl(phenyl)silylpentanoate**

Diazomethane in ether (25 cm3) [prepared from diazald (3 g) and a mixture of methanol (6 cm3), water (12.6 cm3) and potassium hydroxide (1.5 g)] was added to the amido acid (96 mg, 0.25 mmol). The solvent was removed by evaporation under reduced pressure, and the residue dissolved in dichloromethane (30 cm3). The solution was washed with sodium bicarbonate solution, dried (Na2SO4) and concentrated under reduced pressure to give the *amido* *ester* (97.2 mg, 98%) as plates, mp 81.5-83 °C (from pentane); *R*f(MeOH-CH2Cl2, 20:80) 0.89 or [EtOAc-light petroleum (bp 40-60 °C), 20:80] 0.29; **max(CH2Cl2)/cm–1 3420 (CONH), 1715 (CO2Me), 1660 (CONH), 1100 (SiPh), 830 and 810 (SiMe2); **H(250 MHz; CDCl3) 7.57-7.14 (10 H, m, SiPh and NHCH2*Ph*), 5.29 (1 H, br, NH), 4.24 (2 H, d, *J* 5.6, PhC*H*2NH), 3.6 (3 H, s, CO2Me), 2.82 (1 H, qd, *J* 7.1 and 3.3, MeC*H*CO2Me), 2.46 (1 H, qd, *J* 7.1 and 5.1, MeC*H*CONH), 1.74 (1 H, dd, *J* 5.1 and 3.3, CHSi), 1.13 (3 H, d, *J* 7.1, *Me*CHCO2Me), 1.1 (3 H, d, *J* 7.1, *Me*CHCONH) and 0.43 (6 H, s, SiMe2); *m*/*z* (EI) 397 (0.2%, *M*+), 382 (13, *M* – Me), 338 (6, *M* – C2H5O2), 320 (18, *M* – Ph), 310 (20, *M* – C4H7O2), 297 (8, *M* – C7H6), 135 (52, PhMe2Si+), 91 (100, C7H7+) and 69 (54, C5H9+)(Found: C, 69.24; H, 7.88; N, 3.58; M+, 397.2084. C23H31NO3Si requires C, 69.54; H, 7.87; N, 3.52% *M*, 397.2074).

**(3*RS*,4*SR*,5*SR*)-1-Benzyl-3,5-dimethyl-4-dimethyl(phenyl)silylpiperidine-2,6-dione**

The amido-ester (13.9 mg, 0.035 mmol) and lithium triethylborohydride (0.69 mol dm–3 solution in THF, 51 µl, 0.035 mmol) in dry THF (0.15 cm3) were kept at room temperature under argon for 3.5 h. Ether (0.6 cm3) was added, the mixture cooled to 0 °C and brine (0.25 cm3) added. The aqueous layer was neutralised with hydrochloric acid solution (3 mol dm–3) and the mixture was extracted with ether (3  6 cm3). The combined organic layers were dried (Na2SO4), concentrated under reduced pressure and chromatographed (SiO2, EtOAc-pentane, 20:80) to give, unexpectedly, the *imide* (7 mg, 55%); *R*f(EtOAc-pentane, 20:80) 0.51; **max(CH2Cl2)/cm–1 1715 (CON), 1660 (CON), 1110 (SiPh), 820 and 810 (SiMe2); **H(250 MHz; CDCl3) 7.43-7.21 (10 H, m, SiPh and *Ph*CH2N), 4.80 (2 H, s, PhC*H*2N), 2.87 (2 H, qd, *J* 7.3 and 5.1, 2  MeC*H*), 1.76 (1 H, t, *J* 5.1, CHSi), 1.27 (6 H, d, *J* 7.3, 2  *Me*CH) and 0.30 (6 H, s, SiMe2); *m*/*z* (EI) 365 (0.93%, *M*+), 350 (16, *M* – Me), 274 (4, *M* – C7H7), 198 (5, C12H8NO2+), 166 (8, C12H8N+), 135 (100, PhMe2Si+) and 91 (80, C7H7+)(Found: M+, 365.1799. C22H27NO2Si requires *M*, 365.1811).

**(3*RS*,4*RS*,5*SR*)-1-Benzyl-3,4-dihydro-3,5-dimethyl-4-dimethyl(phenyl)silylpyridin-2(1*H*)-one**

Similarly, but using an excess of the reducing agent, the amido-ester (13.4 mg, 0.034 mmol) and lithium triethylborohydride (0.115 mmol) gave the ,-*unsaturated* *lactam* (7.5 mg, 64%); *R*f(EtOAc-pentane, 50:50) 0.39; **max(CH2Cl2)/cm–1 1650 (CON), 1690 and 810 (C=C), 1210 and 830 (SiMe2) and 1100 (SiPh); **H(250 MHz; CDCl3) 7.44-7.25 (10 H, m, Ph), 5.71 (1 H, q, *J* 1.2, C*H*C=CMe), 4.86 (1 H, d, *J* 14.6, NC*H*AHBPh), 4.04 (1 H, d, *J* 14.6, NCHA*H*BPh), 2.87 (1 H, qd, *J* 7.1 and 7.0, C*H*Me), 1.83 (1 H, d, *J* 7.0, CHSi), 1.36 (3 H, d, *J* 1.2, *Me*C=CH), 1.17 (3 H, d, *J* 7.1, CH*Me*), 0.32 (3 H, s, Si*Me*AMeB) and 0.2 (3 H, s, SiMeA*Me*B); *m*/*z* (EI) 334 (0.41%, *M*+ – Me), 261 (12, *M* – C7H4) 260 (4, *M* – C7H5), 213 (30, *M* – PhMe2SiH), 212 (12, *M* – PhMe2SiH2), 137 (72, PhMe2SiH2+), 135 (38, PhMe2Si+) and 91 (100, C7H7+)(Found: M+ – Me, 334.1647. C22H27NOSi requires *M* – Me, 334.1631).

**(2*RS*,3*SR*,4*SR*)-2,4-Dimethyl-3-dimethyl(phenyl)silylpentan-1,5-diol**

The diester **51**(1.3 g, 4 mmol) and lithium aluminium hydride (0.4 g, 10.6 mmol) were mixed in dry THF (60 cm3) under argon at 0 °C, and stirred at room temperature for 3 days. The mixture was cautiously quenched with water at 0 °C, diluted with ether and filtered through Celite. The solvents were evaporated off to give the *diol* (1.05 g, 99%) as a gum; *R*f(hexane-EtOAc, 1:1) 0.17; **H(250 MHz; CD3OD) 7.57-7.31 (5 H, m, Ph), 3.51 (2 H, dd, *J* 10.6 and 7.1, 2  C*H*ACHBOH), 3.43 (2 H, dd, *J* 10.6 and 7.3, 2  CHAC*H*BOH), 1.95 (2 H, m, 2  MeC*H*), 1.42 (1 H, t, *J* 2.4, CHSi), 0.95 (6 H, d, *J* 7.2, 2  *Me*CH) and 0.38 (6 H, s, SiMe2); **C(CD3OD) 140.3, 134.2, 128.8, 127.8, 68.0, 35.6, 29.7, 17.2 and –1.1.

**(2*RS*,3*SR*,4*SR*)-2,4-Dimethyl-3-dimethyl(4-tolyl)silylpentan-1,5-diol 61**

Similarly, the diester **60** (3.1 g, 9.25 mmol) gave the *diol* (2.5 g, 96%) as prisms, mp 85-86 °C (from light petroleum); *R*f(hexane-EtOAc, 1:1) 0.19; **H(250 MHz; CD3OD) 7.43 (2 H, d, *J* 7.7, ArH), 7.16 (2 H, d, *J* 7.7, ArH), 3.54 (2 H, dd, *J* 10.4 and 7.2, 2  C*H*ACHBOH), 3.45 (2 H, dd, *J* 10.6 and 7.4, 2  CHAC*H*BOH), 2.33 (3 H, s, Ar*Me*), 1.95 (2 H, m, 2  MeC*H*), 1.39 (1 H, t, *J* 2.5, SiCH), 0.96 (6 H, d, *J* 7.2, 2  *Me*CH) and 0.37 (6 H, s, SiMe2); *m*/*z* (EI) 265 (2%, M– Me), 189 (4, M – MeC6H4), 151 (100, MeC6H4SiMe2H2+) and 149 (65, MeC6H4SiMe2+)(Found: M – Me, 265.1618. C16H28SiO2 requires *M* – Me, 265.1624).

**(2*RS*,3*SR*,4*SR*)-1,5-Diacetoxy-2,4-dimethylpent-3-yl(dimethyl)(4-tolyl)silane**

The diol **61** (1.6 g, 5.6 mmol) and acetic anhydride (4.3 cm3, 4.6 g, 4.5 mmol) were kept in dry pyridine (15 cm3) at room temperature for 14 h. Dilution in ether and washing with hydrochloric acid solution (3 mol dm–3) followed by the usual work-up gave the *diacetate* (2.04 g, 100%) as an oil; *R*f(hexane-EtOAc, 3:1) 0.8; **H(250 MHz; CDCl3) 7.32 (2 H, d, *J* 7.5, ArH), 7.15(2 H, d, *J* 7.5, ArH), 3.99 (2 H, dd, *J* 10.6 and 6.1, 2  C*H*AHB), 3.84 (2 H, dd, *J* 10.6 and 8.2, 2  CHA*H*B), 2.22 (3 H, s, Ar*Me*), 2.02 (6 H, s, 2  COMe), 2.02 (2 H, m, 2  C*H*Me), 1.14 (1 H, t, *J* 2.1, CHSi), 0.92 (6 H, d, *J* 7.1, 2  CH*Me*) and 0.37 (6 H, s, SiMe2); *m*/*z* (EI) 349 (15%, M – Me), 273 (44, M – C6H4Me), and 193 (100, AcOCH2CMeCHSiMe2+)(Found: M – Me, 349.1832. C20H32SiO4 requires *M* – Me, 349.1837).

**(2*RS*,3*SR*,4*SR*)-2,4-Dimethyl-1,5-diacetoxypentan-3-ol**

The diacetate (1.95 g, 5.36 mmol), potassium bromide (0.77 g, 9.2 mmol) and anhydrous sodium acetate (1.44 g, 21.8 mmol) in glacial acetic acid (12 cm3) were stirred with cooling while peracetic acid (32% solution in acetic acid, 50 cm3, 33 mmol) was added dropwise. After 1 h, the mixture was poured into sodium hydrogen sulfite solution and extracted with ether. The usual work-up gave the *hydroxy* *diacetate* (1.12 g, 90%) as prisms, mp 186-188 °C (from EtOAc); *R*f(hexane-EtOAc, 3:1) 0.3; **H(250 MHz; CDCl3) 4.16 (4 H, dd, *J* 10.6 and 8.2, 2  CH2), 3.29 (1 H, t, *J* 6.2, C*H*OH), 2.08 (6 H, s, 2  COMe), 2.03 (2 H, m, 2  C*H*Me) and 1.04 (6 H, d, *J* 6.6, 2  CH*Me*); *m*/*z* (EI) 233 (43%, M++ H), 154 (100, M – AcOH – H2O), and 136 (45, M – AcOH – 2  H2O)(Found: M++ H, 233.1369. C11H20O5 requires *M* + H, 233.1384).

**(3*RS*,4*SR*)-3-[(*R*)-1-(benzyloxy)propan-2-yl]-2,2,4-trimethyl-1,2-oxasilolane 62**

Sodium hydride (80% dispersion in oil, 0.24 g, 8 mmol) was washed twice with hexane under argon and suspended in dry DMF (3 cm3). The mixture was cooled to 0 °C and the diol **61** (0.59 g, 2.2 mmol) in dry DMF (2 cm3) and dry THF (1 cm3) was added dropwise, followed after 10 min by benzyl bromide (0.79 g, 0.55 cm3, 4.6 mmol). The mixture was stirred at room temperature under argon for 2.5 h and then quenched cautiously with methanol. Standard workup, extracting with hexane, followed by chromatography (SiO2, hexane-EtOAc, 3:1), gave the *silyl* *ether* (0.26 g, 44%) as an oil; *R*f(hexane-EtOAc, 3:1) 0.36; **H(250 MHz; CDCl3) 7.40-7.24 (5 H, m, Ph), 4.49 (2 H, s, CH2Ph), 3.95 (1 H, dd, *J* 9.4 and 6.5, C*H*AHB), 3.48-3.15 (3 H, m, CHA*H*B and C*H*A'*H*B'), 2.03 (2 H, m, 2  C*H*Me), 1.04 (3 H, d, *J* 6.7, CH*Me*), 0.99 (3 H, d, *J* 6.3, CH*Me*), 0.55 (1 H, dd, *J* 10.9 and 8.1, C*H*Si), 0.16 (3 H, s, Si*Me*AMeB) and 0.12 (3 H, s, SiMeA*Me*B); *m*/*z* (EI) 279 (1%, M+ + H), 187 (20, M – CH2Ph), 171 (36, M – OBn), 157 (42, M – Bn – 2Me) and 91 (100, Bn+)(Found: M, 278.1698. C16H26SiO2 requires *M*, 278.1703).

**(2*RS*,4*SR*)-2,4-Dimethyl-1-benzyloxy-3,5-dihydroxypentane**

The silyl ether **62** from the previous reaction (0.83 g, 3 mmol) was stirred with hydrogen peroxide (30% solution in water, 4 cm3, 36 mmol), potassium fluoride (0.33 g, 6 mmol) and potassium hydrogen carbonate (0.3 g, 3 mmol) in methanol (5 cm3) and THF (5 cm3) for 18 h at room temperature. Sodium thiosulfate solution was added, and standard workup followed by chromatography (SiO2, hexane-EtOAc, 3:1) gave the diol96 (0.68 g, 95%) as an oil; *R*f(SiO2, hexane-EtOAc, 3:1) 0.12; **H(250 MHz; CDCl3) 7.39-7.25 (5 H, m, Ph), 4.52 (2 H, s, CH2Ph), 3.82 (1 H, dd, *J* 10.9 and 3.2, C*H*AHB), 3.74 (1 H, dd, *J* 9.2 and 3.7, C*H*A'HB'), 3.62 (1 H, dd, *J* 10.9 and 6.2, CHA*H*B), 3.44-3.25 (2 H, m, CHA'*H*B' and C*H*OH), 2.04 (1 H, qd, *J* 6.3 and 3.7, C*H*Me), 1.85 (1 H, qd, *J* 6.6 and 3.2, C*H*Me), 1.00 (3 H, d, *J* 7.1, CH*Me*) and 0.96 (3 H, d, *J* 7.0, CH*Me*); *m*/*z* (EI) 239 (13%, M+ + H), 132 (13, M – OBn), 114 (31, M – OBn – H2O), 107 (53, BnO+) and 91 (100, Bn+)(Found: M+ + H, 239.1648. C14H22O3 requires *M* + H, 239.1647). Also isolated was a trace of the dibenzyl ether (2RS,3SR,4SR)-2,4-*dimethyl*-1,5-*dibenzyloxy*-3-*hydroxypentane*; *R*f(SiO2, hexane-EtOAc, 3:1) 0.38; **H(250 MHz; CDCl3) 7.34-7.23 (5 H, m, Ph), 4.52 (4 H, s, 2  C*H*2Ph), 3.59 (2 H, dd, *J* 9.1 and 5.7, 2  C*H*AHB), 3.52 (2 H, dd, *J* 9.1 and 5.5, 2  CHA*H*B), 3.38 (1 H, t, *J* 6.0, C*H*OH), 2.00 (2 H, m, 2  C*H*Me) and 1.00 (6 H, d, *J* 9.1, 2  CH*Me*); *m*/*z* (EI) 237 (3%, M – Bn), 222 (8, M – Bn – Me), 131 (9, M – 2  OBn), 107 (36, BnO+) and 91 (100, Bn+)(Found: M – CH2Ph, 237.1498. C21H28O3 requires *M* – CH2Ph, 237.1491).

**(2*RS*,3*SR*,4*SR*)-2,4-Dimethylpentan-1,3,5-triol 63**

**Method A.** The benzyl ether (53 mg, 0.22 mmol) and palladium (10% on charcoal, 0.02 g, pre-equilibrated under H2) were stirred in ethanol (1 cm3) at room temperature for 2.5 h while hydrogen (5.4 cm3) was consumed. The catalyst was removed by filtration, and the solvent evaporated off to give the triol (24.3 mg, 75%) as a gum; *R*f(EtOAc) 0.27; **H(250 MHz; CDCl3) 3.88 (2 H, dd, *J* 10.7 and 3.3, 2  C*H*AHB), 3.58 (1 H, m, C*H*OH), 3.58 (2 H, dd, *J* 10.7 and 6.1, 2  CHA*H*B), 1.92 (2 H, qd, *J* 7.0 and 3.3, 2  C*H*Me) and 0.98 (6 H, d, *J* 7.0, 2  CH*Me*), identical (1H NMR) with an authentic sample.34

**Method B.** The diester **57** (1.06 g, 5.2 mmol) in THF (10 cm3) was stirred in a suspension of lithium aluminium hydride (1.64 g, 43 mmol) in THF (10 cm3) under argon for 3 days. Ice-cold water (3 cm3) was added cautiously with cooling, and the mixture was filtered. The filter cake was washed several times with hot ether. The solvent was evaporated off from the filtrate under reduced pressure to give the triol (0.38 g, 49%), identical with the earlier samples.

**Methyl (*E*)-3-[(4-methoxyphenyl)dimethylsilyl]propenoate**

Following Seki and Murai,94 dicobalt octacarbonyl (1 g, 3 mmol), (4-methoxyphenyl)dimethylsilane97 (12.1 g, 73 mmol) in dry toluene (80 cm3) were mixed under argon in a glove box at 0 °C. Methyl acrylate (freshly-distilled from CaH2, 35 cm3, 365 mmol) was added dropwise, and the mixture was stirred at room temperature for 22 h. The mixture was cooled to 0 °C and water (100 cm3) was added slowly with vigorous stirring, and stirring continued for 24 h. The mixture was filtered through Celite and washed with ether (100 cm3). The aqueous layer was extracted with ether (3  50 cm3), the combined organic layers were washed with brine, dried (MgSO4), filtered and evaporated under reduced pressure to give the *ester* (15.6 g, 85%);*R*f[light petroleum (bp 40-60 °C), 1:1] 0.56; **max(film)/cm–1 1728 (C=O), 1594 (Ar), 1248 (SiMe2) and 1113 (SiAr); **H(250 MHz; CDCl3) 7.43 (2 H, d, *J* 8.3, ArH), 7.36 (1 H, d, *J* 18.9, C=CHSi), 6.93 (2 H, d, *J* 8.3, ArH), 6.25 (1 H, d, *J* 18.9, CHCO), 3.82 (3 H, s, ArO*Me*), 3.75 (3 H, s, CO2Me) and 0.39 (6 H, s, Me2Si); **C(100 MHz; CDCl3) 166.3+, 160.8+, 148.3–, 135.3–, 134.6–, 127.1+, 113.8–, 55.1–, 51.7– and –3.0–; *m*/*z* (EI) 250 (41%, M+), 235 (100, M – Me), 219 (37, M – MeO), 165 (45, MeOC6H4SiMe2), 135 (18, MeOC6H4Si) and 59 (8, CO2Me)(Found: M+, 250.1029. C13H18O3Si requires *M*, 250.1025).

**(*E*)-3-[(4-Methoxyphenyl)dimethylsilyl]propenoic acid**

The unsaturated ester (16.1 g, 65 mmol) was refluxed with sodium hydroxide (19 g, 463 mmol) in methanol (125 cm3) and water (19 cm3) for 6 h. The methanol was removed under reduced pressure and water was added (50 cm3). The aqueous solution was washed with ether (3  50 cm3) and then acidified to pH 1 (H2SO4, concentrated) slowly while cooling in ice. The solution was extracted with ether (3  50 cm3) and the combined organic fractions washed with brine, dried (MgSO4) and evaporated under reduced pressure to give the *acid* (14.9 g, 98%); *R*f[light petroleum (bp 40-60 °C), 1:1] 0.11; **max(film)/cm–1 3500-2500 (CO2H), 1699 (C=O), 1595 (Ar), 1249 (SiMe2) and 1116 (SiAr); **H(250 MHz; CDCl3) 7.47 (1 H, d, *J* 18.8, C=CHSi), 7.43 (2 H, d, *J* 8.5, ArH), 6.93 (2 H, d, *J* 8.5, ArH), 6.25 (1 H, d, *J* 18.8, CHCO), 3.82 (3 H, s, ArO*Me*) and 0.41 (6 H, s, SiMe2); **C(100 MHz; CDCl3) 170.2+, 160.9+, 151.3–, 135.3–, 134.1–, 126.7+, 113.9–, 55.1– and –3.1–; *m*/*z* (EI) 236 (21%, M+), 221 (100, M – Me), 165 (58, MeOC6H4SiMe2) and 135 (29, MeOC6H4Si)(Found: M+, 236.0869. C12H16O3Si requires *M*, 236.0869).

**1*S*,5*R*,7*R*-*N*-{3(*E*)-[(4-Methoxyphenyl)dimethylsilyl]propenoyl}tricyclo[5.2.11,5]-4-aza-10,10-dimethyl-3-thiadecane *S*,*S*-dioxide 64**

n-Butyllithium (~1.5 mol dm–3 mmol) was added at –78 °C to (7*S*)-2,10-camphorsultam98 (0.77 g, 3.6 mmol) and 1-pyreneacetic acid (2 mg) as an indicator in dry THF (20 cm3). Complete deprotonation was indicated by the persistence of a pink colour. Pivaloyl chloride (0.5 cm3, 3.6 mmol) was added to the silylacrylic acid (0.85 g, 3.6 mmol) and triethylamine (0.6 cm3, 4.1 mmol) in dry THF (30 cm3) under argon at –78 °C, and the mixture was warmed to room temperature and stirred for 3 h. The lithium salt of the sultam was then added to the mixed anhydride at –78 °C by cannula over 30 min, and the mixture stirred for 3 h at room temperature. Sodium hydrogen carbonate solution (saturated, 50 cm3) was added and the layers separated. The aqueous layer was extracted with ether (3 ****50 cm3). The combined organic fractions were washed with sodium hydrogen carbonate solution (2  100 cm3) and brine (100 cm3), dried (MgSO4) and evaporated under reduced pressure. Chromatography of the residue [SiO2, light petroleum (bp 40-60 °C), 1:1] gave the *sultam* (1.6 g, 90%) as needles, mp 102-104 °C (from MeOH); *R*f[light petroleum (bp 40-60 °C), 1:1] 0.26; **max(CH2Cl2)/cm–1 1679 (C=O), 1594 (Ar), 1165 (SO2N) and 1113 (SiAr); **H(250 MHz; CDCl3) 7.50 (1 H, d, *J* 18.2, C=CHSi), 7.44 (2 H, d, *J* 8.8, ArH), 7.00 (1 H, d, *J* 18.2, C=CHCO), 6.92 (2 H, d, *J* 8.6, ArH), 3.93 (1 H, dd, *J* 7.2 and 5.5, CHN), 3.81 (3 H, s, ArO*Me*), 3.51 (1 H, d, *J* 13.7, C*H*AHBSO2), 3.43 (1 H, d, *J* 13.7, CHA*H*BSO2), 2.12 (2 H, m), 1.89 (3 H, m), 1.47-1.32 (2 H, m), 1.18 (3 H, s, C*Me*AMeB), 0.98 (3 H, s, CMeA*Me*B) and 0.41 (6 H, s, SiMe2); **C(100 MHz; CDCl3) 161.2+, 149.2–, 135.4–, 134.0–, 127.1+, 113.8–, 110.0+, 65.2–, 55.1–, 53.2+, 48.6+, 47.8+, 44.7–, 38.5+, 33.0+, 26.5+, 20.9–, 19.9– and –3.0–; *m*/*z* (EI) 433 (72%, M+) and 418 (24, M – Me)(Found: C, 60.6; H, 7.10; N, 3.1; S, 7.6; M+, 433.1734. C22H31NO4SSi requires C, 60.9; H, 7.20; N, 3.2; S, 7.4% *M*, 433.1743).

**1*S*,5*R*,7*R*-*N*-{3*S*-[(4-Methoxyphenyl)dimethylsilyl]pent-4-enoyl}tricyclo[5.2.11,5]-4-aza-10,10-dimethyl-3-thiadecane *S*,*S*-dioxide 65**

*tert*-Butyllithium (1.7 mol dm–3 solution in pentane, 12.3 cm3, 21 mmol) was added dropwise with stirring to the vinyl bromide (1.0 mol dm–3 solution in THF, 10.5 cm3, 10 mmol) in ether (14 cm3) at –78 °C under argon and the mixture kept for 2 h. The mixture was added by cannula to a suspension of copper(I) iodide (1.98 g, 10 mmol) in dry ether (18 cm3) under argon at –20 °C, and stirred for 20 min. This mixture was transferred by cannula to the sultam (456 mg, 1.05 mmol) and ethylaluminium dichloride (1.0 mol dm–3 solution in hexanes, 10.5 cm3, 10.5 mmol) pre-mixed for 20 min in dry THF (8 cm3) at –78 °C under argon, and stirred at –78 °C for 1.5 h. The mixture was allowed to warm gradually to –50 °C and kept for 0.5 h, and then to –20 °C for 15 min, and finally to 0 °C for 0.5 h. Basic ammonium chloride solution (saturated, 30 cm3) was added at 0 °C. The layers were separated and the aqueous layer was extracted with ether (2  30 cm3). The combined organic fractions were washed with basic ammonium chloride solution (2  15 cm3) and brine, dried (MgSO4) and evaporated under reduced pressure. Crystallisation of the residue gave the sultam (381 mg, 80%) as needles, mp 172-173 °C (from MeOH); *R*f[light petroleum (bp 40-60 °C), 1:1] 0.33; **max(CH2Cl2)/cm–1 1696 (C=O), 1591 (Ar), 1328 (SO2N) and 1112 (SiAr); **H(250 MHz; CDCl3) 7.43 (2 H, d, *J* 8.6, ArH), 6.91 (2 H, d, *J* 8.6, ArH), 5.76 (1 H, m, C*H*=CH2), 4.85 (1 H, d, *J* 10.8,C=C*H*AHB), 4.84 (1 H, d, *J* 16.3,C=CHA*H*B), 3.82 [1 H, m (detail obscured by OMe), CHN], 3.81 (3 H, s, OMe), 3.48 (1 H, d, *J* 13.8, C*H*AHBSO2), 3.39 (1 H, d, *J* 13.8, CHA*H*BSO2), 2.99 (1 H, dd, *J* 15.5 and 11.4, COC*H*AHB), 2.55 (1 H, dd, *J* 15.5 and 3.4, COCHA*H*B), 2.46 (1 H, m, CHSi), 2.03 (2 H, br d, *J* 6.6, C*H*2CHN), 1.89-1.83 (3 H, m), 1.38-1.26 (2 H, m), 1.13 (3 H, s, C*Me*AMeB), 0.95 (3 H, s, CMeA*Me*B), 0.29 (3 H, s, Si*Me*AMeB) and 0.28 (3 H, s, SiMeA*Me*B); **C(100 MHz; CDCl3) 172.0+, 160.6+, 137.9–, 135.5–, 127.4+, 113.6–, 112.6+, 65.4–, 55.0–, 53.1+, 48.3+, 47.7+, 44.7–, 38.5+, 34.0+, 32.9+, 30.8–, 26.5+, 20.8–, 19.9–, –4.6– and –5.1–; *m*/*z* (EI) 461 (9%, M+) and 165 (43, MeOC6H4SiMe2)(Found:. C24H35NSSiO4 requires)(Found: C, 62.1; H, 7.65; N, 2.6; M+, 461.2043. C24H35NO4SSi requires C, 62.4; H, 7.64; N, 3.0% *M*, 461.2056).

**Methyl (3*S*)-3-(4-methoxyphenyl)dimethylsilylpent-4-enoate 66**

Methylmagnesium iodide (3.0 mol dm–3 solution in Et2O, 2.6 cm3, 8 mmol) was added slowly to dry methanol (0.42 cm3, 10 mmol) in dry THF (6 cm3) under argon at 0 °C. After 10 min, the sultam (361 mg, 0.8 mmol) in dry THF (10 cm3) was added at 0 °C, and the mixture was stirred for 18 h at room temperature. Ammonium chloride solution (15 cm3) was added, the layers were separated, and the aqueous layer was extracted with ether (2  20 cm3). The combined organic fractions were washed with brine, dried (MgSO4) and evaporated under reduced pressure. Chromatography of the residue [SiO2, light petroleum (bp 40-60 °C), 3:1] gave recovered chiral auxiliary (117 mg, 70%) and the *ester* (195 mg, 90%); *R*f[light petroleum (bp 40-60 °C), 1:1] 0.59; **max(CH2Cl2)/cm–1 1738 (C=O), 1638 (C=C), 1594 (Ar), 1248 (SiMe2) and 1112 (SiAr); **H(250 MHz; CDCl3) 7.41 (2 H, d, *J* 8.6, ArH), 6.91 (2 H, d, *J* 8.6, ArH), 5.72 (1 H, ddd, *J* 18.3, 10.5 and 7.8, C*H*=CH2), 4.91 (1 H, d, *J* 10.5, C=C*H*AHB), 4.84 (1 H, d, *J* 18.2,C=CHA*H*B), 3.82 (3 H, s, ArO*Me*), 3.59 (3 H, s, CO2Me), 2.34 (3 H, m, COCH2CHSi), 0.27 (3 H, s, Si*Me*AMeB) and 0.27 (3 H, s, SiMeA*Me*B); **C(100 MHz; CDCl3) 173.9+, 160.7+, 138.0–, 135.5–, 127.3+, 113.6–, 112.7+, 55.0–, 51.5–, 33.7+, 30.5–, –4.5– and –5.3–; *m*/*z* (FAB) 278 (3%, M+) and 165 (100, MeOC6H4SiMe2)(Found: M+, 278.1346. C15H22O3Si requires *M*, 278.1338).

**Methyl (2*S*,3*R*)-3-(4-methoxyphenyl)dimethylsilyl-2-methylpent-4-enoate 67**

n-Butyllithium (2.09 mol dm–3 solution in hexane, 0.33 cm3, 0.7 mmol) was added to distilled diisopropylamine (0.1 cm3, 0.7 mmol) in dry THF (2.5 cm3) at 0 °C under argon, and the mixture was stirred at 0 °C for 20 min. The ester (98 mg, 0.4 mmol) in THF (4.3 cm3) was added under argon at –78 °C and the mixture kept for 0.5 h. Methyl iodide (0.4 cm3, 7 mmol) was added slowly and the mixture kept for a further 1 h at –78 °C and then warmed to 0 °C over 2 h. Ammonium chloride solution (saturated, 15 cm3) was added, the layers were separated, and the aqueous layer was extracted with ether (3  15 cm3). The combined organic fractions were washed with brine (30 cm3), dried (MgSO4) and evaporated under reduced pressure. Chromatography of the residue [SiO2, light petroleum (bp 40-60 °C)-EtOAc, 9:1] gave the *ester* (94 mg, 94%); *R*f(hexane-EtOAc, 9:1) 0.27; **max(CDCl3)/cm–1 1737 (C=O), 1594 (Ar), 1248 (SiMe2) and 1112 (SiAr); **H(400 MHz; CDCl3) 7.42 (2 H, d, *J* 8.6, ArH), 6.90 (2 H, d, *J* 8.6, ArH), 5.59 (1 H, dt, *J* 16.9 and 10.5, C*H*=CH2), 4.95 (1 H, dd, *J* 10.1 and 2.0, CH=C*H*AHB), 4.86 (1 H, dd, *J* 16.9 and 1.7, CH=CHA*H*B), 3.80 (3 H, s, ArO*Me*), 3.47 (3 H, s, CO2*Me*), 2.56 (1 H, qn, *J* 7.1, C*H*Me), 2.17 (1 H, dd, *J* 10.8 and 7.3, CHSi), 1.07 (3 H, d, *J* 7.0, CH*Me*), 0.28 (3 H, s, Si*Me*AMeB) and 0.24 (3 H, s, SiMeA*Me*B); **C(100 MHz; CDCl3) 176.6+, 160.5+, 135.8–, 135.2–, 127.9+, 115.1+, 113.5–, 55.0–, 51.4–, 39.6–, 15.9–, 14.1–, –3.4– and –4.3–; *m*/*z* (ESI) 315 (MNa+)(Found: M+ + Na, 315.1387. C16H24O3Si requires *M* + Na, 315.1392).

**(2*S*,3*R*)-3-(4-Methoxyphenyl)dimethylsilyl-2-methylpent-4-en-1-ol**

The ester **67** (61 mg, 0.2 mmol) in dry ether (6 cm3) was added to a stirred suspension of lithium aluminium hydride (38 mg, 1 mmol) in dry ether (4 cm3) at 0 °C under argon, and the mixture was stirred at 0 °C for 3 h. Water was added, followed by sodium hydroxide solution. The mixture was allowed to warm to room temperature, the layers were separated and the aqueous layer was extracted with ether (2  10 cm3). The organic fractions were combined, dried (MgSO4) and evaporated under reduced pressure to give the *alcohol* (55 mg, 90%); *R*f[light petroleum (bp 40-60 °C), 1:1] 0.32; **H(250 MHz; CDCl3) 7.44 (2 H, d, *J* 8.6, ArH), 6.91 (2 H, d, *J* 8.6, ArH), 5.78 (1 H, dt, *J* 16.7 and 10.6, C*H*=CH2), 4.97 (1 H, dd, *J* 10.2 and 2.2, CH=C*H*AHB), 4.91 (1 H, dd, *J* 16.7 and 2.3, CH=CHA*H*B), 3.82 (3 H, s, OMe), 3.38 (2 H, m, CH2O), 2.03 (1 H, dd, *J* 11.0 and 3.5, CHSi), 1.82 (1 H, m, C*H*Me), 0.86 (3 H, d, *J* 7.0, CH*Me*), 0.31 (3 H, s, Si*Me*AMeB) and 0.28 (3 H, s, SiMeA*Me*B); **C(63 MHz; CDCl3) 160.4+, 135.9–, 135.4–, 128.8+, 114.9+, 113.5–, 68.1+, 55.0–, 37.0–, 35.4–, 14.0–, –3.3– and –3.8–; *m*/*z* (ESI) 287.1 (100%, M+ + Na) (Found: M+ + Na, 287.1449. C15H24O2Si requires *M* + Na, 287.1443).

**(2*S*,3*R*)-3-(4-Methoxyphenyl)dimethylsilyl-2-methylpent-4-en-1-ol *tert*-butyldimethylsilyl ether**

The alcohol (42 mg, 0.2 mmol), *tert-*butyldimethylsilyl chloride (134 mg, 1.8 mmol) and imidazole (142 mg, 1.8 mmol) were stirred in dichloromethane (1 cm3) at room temperature for 1 h. Water was added and the mixture extracted with ether (3 5 cm3). The combined organic fractions were washed with brine (10 cm3), dried (MgSO4) and evaporated under reduced pressure. The residue was chromatographed [SiO2, EtOAc-light petroleum (bp 40-60 °C), 5:95] to give the *silyl ether* (66 mg, 94%); *R*f[Et2O-light petroleum (bp 40-60 °C), 1:1] 0.74; **max(film)/cm–1 1594 (Ar) and 1110 (SiAr); **H(400 MHz; CDCl3) 7.4 (2 H, d, *J* 8.6, ArH), 6.9 (2 H, d, *J* 8.6, ArH), 5.69 (1 H, dt, *J* 16.9 and 10.4, C*H*=CH2), 4.91 (1 H, dd, *J* 10.0 and 2.4, CH=C*H*AHB), 4.81 (1 H, dd, *J* 16.5 and 2.3, CH=HA*H*B), 3.80 (3 H, s, OMe), 3.30 (1 H, dd, *J* 9.6 and 7.3. C*H*AHBOTBDMS), 3.21 (1 H, dd, *J* 9.6 and 6.8, CHA*H*BOTBDMS), 2.03 (1 H, dd, *J* 10.7 and 3.2, CHSi), 1.8 (1 H, sextet-d, *J* 6.9 and 3.1, C*H*Me), 0.85 (9 H, s, tBu), 0.78 (3 H, d, *J* 7.0, CH*Me*), 0.27 (3 H, s, Si*Me*AMeB), 0.25 (3 H, s, SiMeA*Me*B), –0.03 (3 H, s, Si*Me*AMeBtBu) and –0.04 (3 H, s, SiMeA*Me*BtBu); **C(63 MHz; CDCl3) 160.3+, 135.7–, 135.4–, 129.2+, 114.7+, 113.4–, 67.9+, 54.9+, 36.3–, 35.4–, 25.9–, 14.0–, –3.1–, –3.6– and –5.3–; *m*/*z* (EI) 378.2 (0.3%, M+), 363 (3, M – Me), 351 (2, M – CH2=CH), 321 (10, M – tBu), 239 (8) and 165 (100, M – MeOC6H4SiMe2)(Found: M+, 378.2417. C21H38O2Si2 requires *M*, 378.2410).

**(3*R*,4*S*)-5-*tert*-Butyldimethylsilyloxy-3-(4-methoxyphenyl)dimethylsilyl-4-methylpentan-1-ol**

The *tert-*butyldimethylsilyl ether (30 mg, 0.1 mmol) was stirred with borane-THF (1 mol dm–3, 0.3 cm3, 0.3 mmol) at room temperature under argon for 3 h. Sodium hydroxide solution (3 mol dm–3, 0.1 cm3, 0.3 mmol) and hydrogen peroxide (30 vol, 0.1 cm3, 0.3 mmol) were added, and the solution was stirred at room temperature for 1 h, and then heated to 50 °C for 1.5 h. Water was added and the mixture was extracted with ether (3  5 cm3). The combined organic fractions were washed with brine (10 cm3), dried (MgSO4) and evaporated under reduced pressure. The residue was chromatographed [SiO2, EtOAc-light petroleum (bp 40-60 °C), 15:85] to give the *alcohol* (30 mg, 96%); *R*f[Et2O-light petroleum (bp 40-60 °C), 1:1] 0.33; **max(film)/cm–1 3423 (br, OH), 1594 (Ar), 1259 (SiMe2) and 1109 (SiAr); ** z; CDCl3) 7.4 (2 H, d, *J* 8.6, ArH), 6.9 (2 H, d, *J* 8.6, ArH), 3.81 (3 H, s, OMe), 3.6-3.39 (2 H, m, C*H*2OH), 3.40 (2 H, d, *J* 7.6, C*H*2OSi), 2.2 (1 H, m, OH), 1.9 (1 H, sextet-d, *J* 7.3 and 2.3, MeC*H*), 1.28 (1 H, m, CHSi), 0.89 (9 H, s, tBu), 0.74 (3 H, d, *J* 6.9, CH*Me*), 0.30 (3 H, s, Si*Me*AMeB), 0.29 (3 H, s, SiMeA*Me*B), 0.02 (3 H, s, Si*Me*AMeBtBu) and 0.01 (3 H, s, SiMeA*Me*BtBu);**C(63 MHz; CDCl3) 135.2–, 113.5–, 67.2+, 63.7+, 55.0–, 35.2–, 29.7+, 27.4+, 25.9–, 21.5–, 13.7–, –2.8–, –3.0–, –5.2– and –5.3–; *m*/*z* (FAB) 381 (2%, M – Me), and 165 (100, M – MeOC6H4SiMe2)(Found, M+ + Na, 419.2438. C21H40O3Si2 requires *M* + Na, 419.2416)

**(3*R*,4*S*)-5-*tert*-Butyldimethylsilyloxy-3-(4-methoxyphenyl)dimethylsilyl-4-methylpentanal**

The alcohol (24 mg, 0.06 mmol), tetrapropylammonium perruthenate (1 mg), *N*-methylmorpholine *N*-oxide (10 mg, 0.1 mmol) and 4Å molecular sieves (25 mg) were stirred in dichloromethane (1 cm3) at room temperature under argon for 3 h. The mixture was filtered through a short pad of silica, eluting with dichloromethane. The filtrate was evaporated under reduced pressure to give the *aldehyde* (23 mg, 98%); *R*f[Et2O-light petroleum (bp 40-60 °C), 1:1] 0.50; **max(film)/cm–1 1724 (C=O), 1594 (Ar) and 1109 (SiAr); **H(250 MHz; CDCl3) 9.50 (1 H, t, *J* 2.3, CH2C*H*O), 7.43 (2 H, d, *J* 8.6, ArH), 6.9 (2 H, d, *J* 8.6, ArH), 3.81 (3 H, s, OMe), 3.34 (1 H, dd, *J* 10.0 and 6.7, C*H*AHBOSi), 3.30 (1 H, dd, *J* 10.0 and 7.2, CHA*H*BOSi), 2.47 (1 H, ddd, *J* 16.9, 7.6 and 2.6, C*H*AHBCHO), 2.25 (1 H, ddd, *J* 16.9, 5.6 and 2.0, CHA*H*BCHO), 1.93 (1 H, sextet-d, *J* 7.1 and 2.6, C*H*Me), 1.86 (1 H, ddd, *J* 10.2, 5.6 and 2.6, CHSi), 0.88 (9 H, s, tBu), 0.75 (3 H, d, *J* 6.9, CH*Me*), 0.31 (3 H, s, Si*Me*AMeB), 0.30 (3 H, s, SiMeA*Me*B), 0.087 (3 H, s, Si*Me*AMeBtBu) and –0.01 (3 H, s, SiMeA*Me*BtBu); **C(100 MHz; CDCl3) 203.8–, 135.3–, 113.7–, 67.3+, 55.0–, 40.3+, 35.4–, 29.7+, 25.9–, 20.6–, 14.0–, 1.0–, –2.9–, –3.3–, –5.4– and 5.5–; *m*/*z* (EI) 394.2 (0.3%, M+), 379.2 (0.2, M – Me), and 165.1 (82, M – MeOC6H4SiMe2)(Found: M+, 394.2368. C21H38O3Si2 requires *M*, 394.2359).

**(3*R*,4*S*)-5-*tert*-Butyldimethylsilyloxy-3-(4-methoxyphenyl)dimethylsilyl-4-methylpentanoic acid**

The aldehyde (30 mg, 0.076 mmol) and 2-methyl-2-butene (40 l) in *tert*-butanol (0.6 cm3) were mixed with sodium chlorite (68.6 mg, 0.76 mmol) and sodium dihydrogen orthophosphate (68.6 mg, 0.58 mmol) in water (0.6 cm3), and the mixture was stirred for 20 h at room temperature. Solid sodium chloride was added to saturation, and the products extracted with ether (3 10 cm3). The organic layers were combined, dried (MgSO4) and evaporated under reduced pressure and the residue was chromatographed [SiO2, EtOAc-light petroleum (bp 40-60 °C), 25:75] to give *acid* (31 mg, 100%); *R*f(Et2O-light petroleum (bp 40-60 °C), 1:1] 0.26; **max(film)/cm–1 2800-3600 (OH), 1706 (C=O), 1594 (Ar) and 1110 (SiAr); **H(400 MHz; CDCl3) 7.40 (2 H, d, *J* 8.6, ArH), 6.90 (2 H, d, *J* 8.6, ArH), 3.80 (3 H, s, OMe), 3.43 (1 H, dd, *J* 10.0 and 7.2, C*H*AHBOSi), 3.36 ( 1 H, dd, *J* 10.0 and 6.6, CHA*H*BOSi), 2.43 (1 H, dd, *J* 16.3 and 7.3, COC*H*AHB), 2.30 (1 H, dd, *J* 16.3 and 6.0, COCHA*H*B), 1.89 (1 H, sextet-d, *J* 7.0 and 2.7, MeC*H*), 1.66 (1 H, ddd, *J* 7.3, 6.0 and 2.6, CHSi), 0.86 (9 H, s, tBu), 0.76 (3 H, d, *J* 7, CH*Me*), 0.31 (3 H, s, Si*Me*AMeB), 0.30 (3 H, s, SiMeA*Me*B), 0.004 (3 H, s, Si*Me*AMeBtBu) and 0.00 (3 H, s, SiMeA*Me*BtBu); **C(63 MHz; CDCl3) 179.9+, 160.5+, 135.4–, 128.8+, 113.6–, 67.7+, 55.0–, 35.6–, 30.7+, 25.9–, 23.4–, 18.3+, 14.3–, –3.0–, –3.1– and –5.5–; *m*/*z* (ESI) 433.2 (95%, M+ + Na)(Found: M+ + Na, 433.2223. C21H38O4Si2 requires *M* + Na, 433.2206).

**Methyl (3*R*,4*S*)-5-*tert*-butyldimethylsilyloxy-3-(4-methoxyphenyl)dimethylsilyl-4-methylpentanoate 68**

The carboxylic acid (21 mg, 0.05 mmol) and an excess of diazomethane were mixed in dry ether (1 cm3) and kept at room temperature for 1 h. The excess diazomethane was consumed by the addition of glacial acetic acid. The solvent was evaporated off under reduced pressure, and the residue was chromatographed [SiO2, EtOAc-light petroleum (bp 40-60 °C), 5:95] to give the *ester* (23 mg, 100%); *R*f[Et2O-light petroleum (bp 40-60 °C), 1:1] 0.52; **max(film)/cm–1 1730 (CO); **H(400 MHz; CDCl3) 7.40 (2 H, d, *J* 8.6, ArH), 6.90 (2 H, d, *J* 8.6, ArH), 3.81 (3 H, s, ArO*Me*), 3.54 (3 H, s, CO2Me), 3.41 (1 H, dd, *J* 10.0 and 6.8, C*H*AHBOSi), 3.30 (1 H, dd, *J* 10.0 and 7.1, CHA*H*BOSi), 2.38 (1 H, dd, *J* 15.7 and 7.4, COC*H*AHB), 2.40 (1 H, dd, *J* 15.7 and 6.8, COCHA*H*B), 1.90 (1 H, m, C*H*Me), 1.69 (1 H, dt, *J* 7.0 and 2.5, CHSi), 0.88 (9 H, s, tBu), 0.77 (3 H, d, *J* 7.0, CH*Me*), 0.28 (6 H, s, SiMe2), –0.009 (3 H, s, Si*Me*AMeBtBu) and –0.015 (3 H, s, SiMeA*Me*BtBu); **C(63 MHz; CDCl3) 175.0+, 160.4+, 135.4–, 129.1+, 113.6–, 67.6+, 55.0–, 51.4–, 35.7–, 30.8+, 25.9–, 23.5–, 18.3+, 14.2–, –2.9–, –3.2– and –5.4–; *m*/*z* (ESI) 447.2 ( 100%, M+ + Na)(Found: M+ + Na, 447.2363. C22H40O4Si2 requires *M* + Na, 447.2363).

**Methyl (2*R*,3*S*,4*S*)-5-*tert*-butyldimethylsilyloxy-3-(4-methoxyphenyl)dimethylsilylpentanoate 69**

Similar to the methylations of the esters **54**, the ester **68** (20 mg, 0.1 mmol), LDA (0.09 mmol) and methyl iodide (60 l, 0.94 mmol) were combined. Chromatography [SiO2, EtOAc-light petroleum (bp 40-60 °C), 10:90] gave the *ester* (16 mg, 77%); *R*f[Et2O-light petroleum (bp 40-60 °C), 1:1] 0.54; **max(film)/cm–1 1735 (C=O), 1594 (Ar) and 1110 (SiMe); **H(400 MHz; CDCl3) 7.40 (2 H, d, *J* 8.6, ArH), 6.9 (2H, d, *J* 8.6, ArH), 3.79 (3 H, s, ArO*Me*), 3.58 (3 H, s, CO2Me), 3.45 (1 H, dd, *J* 10.0 and 6.5, C*H*AHBOSi), 3.25 (1 H, dd, *J* 10.0 and 7.2, CHA*H*BOSi), 2.66 (1 H, qd, *J* 7.3 and 3.2, COC*H*Me), 1.9 (3 H, m, C*H*Me and C*H*Si), 1.13 (3 H, d, *J* 7.2, COCH*Me*), 0.84 (9 H, s, tBu), 0.83 (3 H, d, *J* 7.2, CH*Me*OSi), 0.36 (3 H, s, Si*Me*AMeB), 0.35 (3H, s, SiMeA*Me*B), –0.03 (3 H, s, Si*Me*AMeBtBu) and –0.04 (3 H, s, SiMeA*Me*BtBu); **C(63 MHz; CDCl3) 178.1+, 160.1+, 135.4–, 130.8+, 113.4–, 67.6+, 55.0–, 51.5–, 38.0–, 35.6–, 30.8–, 25.9–, 18.3+, 17.7–, 15.6–, –1.4–, –2.9–, –5.4– and –5.5–.

**(2*S*,3*S*,4*R*)-5-*tert*-Butyldimethylsilyloxy-3-hydroxy-2,4-dimethylpentanoic acid 70**

**Method A.** The ester **69** (46 mg, 0.1 mmol) and sodium hydroxide (40 mg, 1 mmol) were heated in methanol (0.2 cm3) and water (40 l) to 50 °C for 6 h. Methanol was removed under reduced pressure and the residue was dissolved in water (3 cm3). The aqueous layer was acidified with hydrochloric acid solution (1 mol dm–3) and extracted with ethyl acetate (3  3 cm3). The organic layers were combined, washed with brine (1  3 cm3), dried (MgSO4) and evaporated under reduced pressure to give acid (34.4 mg, 81%). Potassium bromide (46 mg, 0.38 mmol) and anhydrous sodium acetate (47 mg, 0.18 mmol) were added to the acid (77 mg, 0.18 mmol) in glacial acetic acid (0.047 cm3). Peracetic acid (0.047 cm3) was added dropwise to the mixture at 0 °C. More sodium acetate (141 mg) and peracetic acid (1.41 cm3) were added to the mixture and the resulting turbid solution was then stirred at 0 °C for 12 h. Ether (40 cm3) was added and sodium thiosulfate (1 g) in water stirred vigorously for 30 min. The mixture was filtered through Celite and the organic layer of the filtrate evaporated under reduced pressure. The residue was taken up in ether and washed with saturated sodium hydrogen carbonate solution (3  10 cm3), brine (10 cm3), dried (Na2SO4) and evaporated under reduced pressure. The residue was chromatographed [SiO2, Et2O-light petroleum (bp 40-60 °C), 1:1] to give the -hydroxy acid (30.5 mg, 61%); *R*f[Et2O-light petroleum (bp 40-60 °C), 1:1] 0.1; []D +1.0° (*c*. 0.5 in CDCl3); **max(film)/cm–1 3600-2800 (OH) and 1706 (CO); **H(250 MHz; CDCl3) 3.85 (1 H, dd, *J* 10.2 and 3.9, C*H*AHBOTBS), 3.65 (1 H, m, C*H*OH), 3.61 (1 H, dd, *J* 10.2 and 8.5, CHA*H*BOTBS), 2.72 (1 H, qd, *J* 7.3 and 4.0, COC*H*Me), 1.93 (1 H, sextet-d, *J* 6.9 and 3.9, C*H*MeCH2), 1.35 (3 H, d, *J* 7.2, CH*Me*), 0.91 (9 H, s, tBuSi), 0.90 (3 H, shoulder on tBuSi signal) and 0.11 (6 H, s, SiMe2); **C(63 MHz; CDCl3) 176.0+, 79.3–, 68.9+, 42.9–, 37.2–, 25.7–, 18.0+, 14.9–, 13.3–, –5.6– and –5.7–; *m*/*z* (ESI) 299.2 (65%, M+ + Na)(Found: M+ + Na, 299.1658. C13H28O4Si requires *M* + Na, 299.1655).

**Method B.** Following Pinnick,47 sodium chlorite (0.68 g, 7.6 mmol) and sodium dihydrogen phosphate (0.78 g, 5.7 mmol) in water (1.5 cm3) were added to 2-methyl-2-butene (1 mol dm–3 solution in THF, 0.4 cm3, 0.4 mmol) and the aldehyde, (2*S*,3*S*,4*R*)-5-(*tert*-butyldimethylsilyloxy)-3-hydroxy-2,4-dimethylpentanaldescribed below, (199 mg, 0.76 mmol) in *tert*-butanol (6 cm3) at –10 °C, and the mixture was stirred for 5 h. The *tert*-butanol was evaporated off under reduced pressure and the residue was diluted with brine (5 cm3). The aqueous layer was extracted with ethyl acetate (3  5 cm3). The organic fractions were combined, washed with brine (10 cm3), dried (MgSO4) and the solvents evaporated off under reduced pressure. The residue was chromatographed [SiO2, EtOAc-light petroleum (bp 40-60 °C), 1:1] to give carboxylic acid (191 mg, 91%), identical (1H and 13C NMR, and []D) with the sample prepared using the silicon-based route.

**(3*S*,4*R*)-4-((*R*)-1-Iodopropan-2-yl)-3-methyloxetan-2-one 71**

Following Adam and coworkers,43 benzenesulfonyl chloride (0.3 cm3, 2.32 mmol) was added slowly to the hydroxy acid (105 mg, 0.38 mmol) in pyridine (5 cm3) at –20°C under nitrogen. and the mixture was kept at –20 °C for 40 h. Ether (5 cm3) and ice were added and the mixture was stirred for 5 min. The aqueous layer was extracted with ether (2  10 cm3). The combined organic fractions were washed with hydrochloric acid solution (0.5 mol dm–3, 10 cm3), brine (1  20 cm3), dried (MgSO4) and the solvent evaporated under reduced pressure. The residue was chromatographed [SiO2, EtOAc-light petroleum (bp 40-60 °C), 5:95] to give the -lactone (84 mg, 86%); *R*f[EtOAc-light petroleum (bp 40-60 °C), 10:90] 0.50; **max(CHCl3)/cm–1 1820 (CO); **H(250 MHz; CDCl3) 4.14 (1 H, dd, *J* 8.1 and 4.2, CHO), 3.68 (1 H, dd, *J* 10.0 and 4.6, C*H*AHBOSi), 3.61 (1 H, dd, *J* 10.0 and 4.2, CHA*H*BOSi), 3.36 (1 H, qd, *J* 7.5 and 4.2, COC*H*Me), 2.00 (1 H, m, C*H*MeCH2), 1.39 (3 H, d, *J* 7.5, COCH*Me*), 0.98 (3 H, d, *J* 6.9, CH*Me*CH2), 0.90 (9 H, s, tBuSi), 0.07 (3 H, s, Si*Me*AMeB) and 0.06 (3 H, s, SiMeA*Me*B). The silyl protected -lactone (154 mg, 0.60 mmol) and hydrofluoric acid (48%, 2.5 cm3) were stirred in acetonitrile (10 cm3) at room temperature for 30 min. Solid sodium bicarbonate was added cautiously until effervescence stopped. Ether (10 cm3) was added and the mixture filtered through a short plug of Celite. The organic layer was washed with sodium bicarbonate solution (saturated, 10 cm3), brine (10 cm3), dried (MgSO4) and concentrated under reduced pressure to give crude alcohol (86 mg, 100%). The alcohol (86 mg, 0.6 mmol), triphenylphosphine (550 mg, 0.2.1 mmol) and imidazole (156 mg, 2.4 mmol) were stirred in dry benzene (6 cm3) and ether (12 cm3) at room temperature until the imidazole had dissolved. Iodine (440 mg, 1.74 mmol) was added with vigorous stirring, and the mixture stirred for 30 min. n-Pentane (10 cm3) was added, and the mixture filtered through a silica pad to remove the triphenylphosphine oxide. The solvents were evaporated off under reduced pressure, and the residue chromatographed [SiO2, EtOAc-light petroleum (bp 40-60 °C), 90:10] to give the *iodide* (122 mg, 80%); *R*f[EtOAc-light petroleum (bp 40-60 °C), 20:80] 0.40; **max(CHCl3)/cm–1 1822 (CO); **H(400 MHz; CDCl3) 3.96 (1 H, dd, *J* 9.1 and 4.1, CHO), 3.36-3.30 (2 H, m, C*H*AHBI and COC*H*Me), 3.25 (1 H, dd, *J* 10.1 and 6.1, CHA*H*BI), 1.75 (1 H, sextet-d, *J* 6.6 and 3.4, C*H*MeCH2), 1.40 (3 H, d, *J* 7.6, COCH*Me*) and 1.03 (3 H, d, *J* 6.8, CH*Me*CH2); **C(100 MHz; CDCl3) 170.9+, 81.3–, 49.7–, 38.7–, 15.5, 12.8– and 10.3+; *m*/*z* 277.0 (M+ + Na)(Found: M+ + Na, 276.9697. C7H11IO2 requires *M* + Na, 276.9702).

**(2*S*,5*S*,6*S*)-2-*tert*-Butyl-6-[(*S*)-1-*tert*-butyldimethylsilyloxypropan-2-yl]-5-methyl-1,3-dioxan-4-one**

Using the recipe of Crich,99-hydroxy acid **70** (290 mg, 1.04 mmol), pivalaldehyde (0.24 cm3, 2.22 mmol), isopropoxytrimethylsilane (0.77 cm3, 4.45 mmol), 4 Å molecular sieves (300 mg) and trimethylsilyl triflate (79.4 l, 0.445 mmol) were stirred in dry dichloromethane (15 cm3) under argon at –78 °C for 3 h, and then stored at –20 °C for 12 h. Ammonium chloride solution was added, and the aqueous layer was extracted with dichloromethane (3 cm3). The organic layers were combined, washed with brine (1 cm3), dried (MgSO4) and the solvents evaporated under reduced pressure. The residue was chromatographed [SiO2, EtOAc-light petroleum (bp 40-60 °C), 5:95] to give *dioxanone* (326 mg, 91%); *R*f[Et2O-light petroleum (bp 40-60 °C), 1:1] 0.42; **max(film)cm–1 1750 (CO); **H(250 MHz; CDCl3) 4.87 (1 H, s, C*H*tBu), 3.76 (1 H, dd, *J* 10.1 and 6.9, C*H*AHBOSi), 3.50 (1 H, dd, *J* 9.8 and 3.4, CHMeC*H*OCHMe), 3.51 (1 H, dd, *J* 10.1 and 5.3, CHA*H*BOSi), 2.99 (1 H, dq, *J* 9.8 and 7.2, OCC*H*MeCHO), 2.02 (1 H, m, OCHC*H*MeCH2), 1.30 (3 H, d, *J* 7.2, OCCH*Me*CHO), 0.98 (9 H, s, tBuCO2), 0.97 (3 H, shoulder on signal from tBuCO2, OCHCH*Me*CH2), 0.89 (9 H, s, tBuSi) and 0.05 (6 H, s, SiMe2); **C(125 MHz; CDCl3) 172.6+, 107.8–, 82.5–, 63.6+, 38.7–, 37.8–, 35.4+, 25.8–, 23.9–, 18.1+, 14.5–, 13.9–, 1.0–, –5.5– and –5.6–; *m*/*z* (ESI) 367.2 (100%, M+ + Na)(Found: M+ + Na, 367.2285. C18H36O4Si requires *M* + Na, 367.2281).

**(2*S*,5*S*,6*S*)-2-*tert*-Butyl-6-[(*S*)-1-hydroxypropan-2-yl]-5-methyl-1,3-dioxan-4-one**

**Method A.** The dioxanone (34.5 mg, 0.1 mmol), tetrabutylammonium fluoride (1.0 mol dm–3 in THF, 0.1 cm3, 0.1 mmol) and acetic acid (7.5 l, 0.13 mmol) were stirred in THF (1.2 cm3) at room temperature. for 2 h. Ether (2 cm3) was added, and the organic layer was washed with water (2 cm3), sodium bicarbonate solution (2 cm3) and brine (2 cm3), dried (MgSO4) and the solvents evaporated off under reduced pressure. The residue was chromatographed [SiO2, Et2O-light petroleum (bp 40-60 °C), 1:1] to give the alcohol (19.0 mg, 83%) as needles, mp. 88-90 C (from hexane); *R*f[Et2O-light petroleum (bp 40-60 °C), 1:1] 0.09; []D20 +6.1 (*c*. 0.69 in CHCl3); **max(Nujol)/cm–1 3415 (OH) and 1713 (C=O); **H(500 MHz; CDCl3) 4.86 (1 H, s, tBuC*H*), 3.72 (2 H, d, *J* 5.2, C*H*2OH), 3.55 [1 H, dd, *J* 9.9 and 3.6, C*H*(OCHtBu)], 2.82 (1 H, dq, *J* 9.9 and 7.3, C*H*MeCO2), 1.96 (1 H, qdd, *J* 7.0, 5.0 and 3.7, C*H*MeCH2OH), 1.67 (1 H, br s, OH), 1.30 (3 H, d, *J* 7.3, CH*Me*CO2), 1.10 (3 H, d, *J* 7.1, CH*Me*CH2OH) and 0.97 (9 H, s, tBu); **C(125 MHz; CDCl3) 171.7+, 107.8–, 83.9–, 63.6+, 39.1–, 37.4–, 35.3+, 23.8–, 14.5– and 13.9–; *m*/*z* (ESI) 253.1 (100%, M+ + Na)(Found: C, 62.6; H, 9.6; M+ + Na, 253.1406. C12H22O4 requires C, 62.6; H, 9.6% *M* + Na, 253.1416).

**Method B.** Hydrogen was bubbled gently through a stirred mixture of palladium (10%-on-charcoal, 210 mg) and the benzyl ether, (2*S*,5*S*,6*S*)-2-*tert*-butyl-6-[(*S*)-1-benzyloxypropan-2-yl]-5-methyl-1,3-dioxan-4-one described below, (284 mg, 0.885 mmol) in dry tetrahydrofuran (32 cm3) for 40 min. The mixture was filtered through a short pad of Celite, eluting with ether, and the filtrate concentrated under reduced pressure to give the alcohol (158 mg, 77%), identical (mp, 1H NMR) with the earlier sample.

**(*R*)-2-[(2*S*,4*S*,5*S*)-2-*tert*-Butyl-5-methyl-6-oxo-1,3-dioxan-4-yl]propanal 72**

The alcohol (154 mg, 0.670 mmol) in dry dichloromethane (9.5 cm3) was added to a stirred solution of Dess-Martin periodinane100 (0.55 g, 1.30 mmol) in dry dichloromethane (9.5 cm3) at room temperature under nitrogen. After 1 h, a mixture of saturated aqueous sodium hydrogen carbonate solution and saturated sodium thiosulfate solution (1:1, 25 cm3) was added, and the mixture stirred vigorously for 5 min. Ether (20 cm3) was added, the layers separated, and the cloudy aqueous layer extracted with ether (2  25 cm3). The combined organic layers were dried (Na2SO4), filtered and evaporated under reduced pressure to give an oil which crystallized. This material was taken up in ether-hexane (1:2, 6 cm3) and filtered quickly through a short silica pad (eluant: Et2O-hexane, 1:2), and the filtrate evaporated under reduced pressure to give the *aldehyde* (146 mg, 96%) as needles, mp. 91-95 C (from Et2O-hexane); *R*f[Et2O-light petroleum (bp 40-60 °C), 1:1] 0.19; []D20 –8.1 (*c*. 0.51 in CHCl3); **max(Nujol)/cm–1 1738 (ester C=O) and 1723 (aldehyde C=O); **H(500 MHz; CDCl3) 9.75 (1 H, d, *J* 2.3, CHO), 4.89 (1 H, s, tBuC*H*), 3.77 [1 H, dd, *J* 10.1 and 3.4, C*H*(OCHtBu)], 2.75 (1 H, dq, *J* 10.1 and 7.3, C*H*MeCO2), 2.63 (1 H, br qdd, *J* 7.1, 3.4 and 2.3, C*H*MeCHO), 1.30 (3 H, d, *J* 7.2, CH*Me*), 1.28 (3 H, d, *J* 7.3, CH*Me*) and 0.97 (9 H, s, tBuCO2); **C(125 MHz; CDCl3) 202.0–, 170.7+, 108.0– (*C*HtBu), 81.5–, 48.2–, 38.9–, 35.4+, 23.7–, 13.2– and 11.1–; *m*/*z* (ESI) 251 (32%, M+ + Na)(Found: M+ + Na, 251.1242. C12H20O4 requires *M* + Na, 251.1259). The crude aldehyde was somewhat unstable, but the crystalline material could be stored indefinitely at –20 C under nitrogen.

**(*S*)-2,4-Dimethylpent-3-enol**

The sultam **73**42 (0.8 g, 2.46 mmol) in dry ether (15 cm3) was added to a stirred suspension of lithium aluminium hydride (0.273 g, 7.38 mmol) in dry ether (15 cm3) at –78 °C under an argon atmosphere, and the mixture was stirred while warming to room temperature over 45 min. Potassium hydrogen sulfate (2.77 g) in water (77 cm3) was added at –78 °C, and the mixture was allowed to warm to room temperature and stirred for 45 min. The layers were separated, and the aqueous layer was extracted with ether (2  20 cm3). The combined organic fractions were washed with brine (20 cm3), dried (MgSO4) and concentrated. Chromatography [SiO2, light petroleum (bp 40-60 °C)-Et2O, 1:1.5] gave the recovered sultam (306 mg, 58%; *R*f[light petroleum (bp 40-60 °C)-Et2O, 2:1] 0.10; and the alcohol42 (194 mg, 69%); *R*f[light petroleum (bp 40-60 °C)-Et2O, 2:1] 0.24; **max(film)/cm–1 3339 (OH) and 1672 (CO); **H(400 MHz; CDCl3) 4.86 (1 H, dqn, *J* 9.5 and 1.3, C=CH), 3.45 (1 H, dd, *J* 10.3 and 5.9, C*H*AHBOH), 3.28 (1 H, dd, *J* 10.3 and 8.3, CHA*H*BOH), 2.59 (1 H, m, C*H*Me), 1.72 (3 H, d, *J* 1.2, C=C*Me*AMeB), 1.65 (3 H, d, *J* 1.3, C=CMeA*Me*B), 1.46 (1 H, br s, OH) and 0.90 (3 H, d, *J* 6.7, CH*Me*); **C(100 MHz; CDCl3) 134.3, 127.2, 67.9, 35.6, 25.9, 18.2, 17.1 and 11.7.

**(*S*)-2,4-Dimethylpent-3-enal 74**

Dimethyl sulfoxide (0.25 cm3, 3.52 mmol) in dry dichloromethane (2 cm3) was added slowly to a stirred solution of oxalyl chloride (0.15 cm3, 1.73 mmol) in dry dichloromethane (7 cm3) at –78 °C. After 10 min, the alcohol (0.18 g, 1.58 mmol) in dry dichloromethane (2 cm3) was added dropwise, and the solution was stirred at –78 °C for 30 min before addition of triethylamine (1.10 cm3, 10.43 mmol). The solution was allowed to warm to room temperature, water (7 cm3) was added, and the mixture was stirred for 10 min. The layers were separated, the aqueous layer was extracted with dichloromethane (3  10 cm3) and the combined organic fractions were washed with hydrochloric acid (3 mol dm–3, 2  10 cm3), saturated sodium hydrogen carbonate solution (2  10 cm3) and brine, dried (MgSO4) and concentrated under reduced pressure without warming to give the aldehyde;101 chromatography gave a pure sample (105 mg, 57%); *R*f[Et2O*-*light petroleum (bp 40-60 °C), 1.5:1] 0.65; **max(film)/cm–1 1724 (CO); **H(200 MHz; CDCl3) 9.48 (1 H, d, *J* 1.9, CHO), 4.94 (1 H, dqn, *J* 8.9 and 1.3, C=CH), 3.22 (1 H, br qn, *J* 6.9, C*H*Me), 1.77 (3 H, s, C=C*Me*AMeB), 1.69 (3 H, d, *J* 1.1, C=CMeA*Me*B) and 1.14 (3 H, d, *J* 6.9, CH*Me*); **C(100 MHz; CDCl3) 210.7, 137.2, 120.6, 51.9, 46.5, 25.9, 18.4, 15.2 and 14.1, but, more generally the aldehyde was concentrated to an approximately 2.5% solution in dichloromethane, assumed to have given a yield of 100%, and used immediately.

**1*R*,5*S*,7*S*-{*N*-[(2*S*,3*S*,4*S*)-3-Hydroxy-2,4,6-trimethylhept-5-enoyl]}tricyclo[5.2.11,5]-4-aza-10,10-dimethyl-3-thiadecane *S*,*S*-dioxide 76**

Following Oppolzer102 the *N*-propionyl sultam103 (3.82 g, 14.6 mmol), *tert*-butyldimethylsilyltriflate (3.50 cm3, 15.4 mmol) and freshly distilled triethylamine (21 cm3, 15.4 mmol) were kept in dry dichloromethane (40 cm3) at room temperature under argon for 3 days. The solvent was thoroughly removed under reduced pressure and the residue taken up in dry hexane (60 cm3) to give a pale orange solution over a dark red liquid residue. The solution was removed by syringe, and the residue washed with more hexane. The hexane was evaporated off under reduced pressure to give the silyl enol ether **75**,102 which was dissolved in dry dichloromethane (20 cm3). The crude aldehyde **74** (0.52 g, 4.65 mmol, assuming 100% yield from Swern oxidation) in dry dichloromethane (20 cm3) was stirred with titanium tetrachloride (1 mol dm–3 solution in CH2Cl2, 4.64 cm3, 4.64 mmol) at –78 °C for 2 min under an argon atmosphere, the solution of the silyl enol ether added, and the mixture was stirred for 5 min. Ammonium chloride solution (30 cm3) was added and the mixture allowed to warm to room temperature. The aqueous layer was extracted with ether (3  40 cm3). The combined organic fractions were washed with brine, dried (MgSO4) and the solvent evaporated off. Chromatography [SiO2, light petroleum (bp 40-60 °C)-Et2O, 2:1] gave the *aldol* [0.57 g, 32% (based on consumption of aldehyde)] as needles, mp 133-134 °C (from EtOH); *R*f[light petroleum (bp 40-60 °C)-Et2O, 2:1] 0.15; **max(Nujol)/cm–1 3439 (OH), 1679 (CO), 1326 (SO2N) and 1166 (SO2N); **H(400 MHz; CDCl3) 5.08 (1 H, br d, *J* 9.8, C=CH), 3.89 (1 H, dd, *J* 7.8 and 4.9, CHN), 3.52 (1 H, d, *J* 13.8, C*H*AHBSO2), 3.50 (1 H, m, C*H*OH), 3.43 (1 H, d, *J* 13.8, CHA*H*BSO2), 3.17 (1 H, qn, *J* 6.6, COC*H*Me), 2.54 (1 H, dqd, *J* 9.8, 6.9 and 3.8, C*H*MeC=C), 2.34 (1 H, d, *J* 10.0, OH), 2.19 (1 H, m), 2.05 (1 H, dd, *J* 13.9 and 7.8, C*H*endoHCHN), 1.95-1.85 (3 H, m), 1.73 (3 H, s, C=C*Me*AMeB), 1.61 (3 H, s, C=CMeA*Me*B), 1.41-1.30 (2 H, m), 1.18 (3 H, s, C*Me*CMeD), 1.14 (3 H, d, *J* 6.6, COCH*Me*), 1.02 (3 H, d, *J* 6.9, CH*Me*C=C) and 0.96 (3 H, s, CMeC*Me*D); **C(100 MHz; CDCl3) 175.4, 133.5, 123.8, 80.1, 65.5, 53.2, 48.3, 47.7, 44.7, 43.9, 38.4, 35.4, 32.9, 26.4, 26.0, 20.8, 19.9, 18.2 and 14.1; *m*/*z* (EI) 384.2 (5.2%, M+ + H), 366.2 (23, M – OH), 300.1 (47, M – CHMeCHCMe2), 216.1 (100, sultam + H) and 135.1 (54, sultam – SO2N); []D –43.3 (*c*. 1.2 in CHCl3)(Found: M+ + H, 384.2230. C20H34NO4S requires *M* + H, 384.2208), and an impure fraction (0.674 g) mixed with the starting material

**(2*S*,3*S*,4*S*)-3-Hydroxy-2,4,6-trimethylhept-5-enoic acid**

The aldol adduct **76** (0.565 g, 1.47 mmol), lithium hydroxide (70.6 mg, 2.94 mmol) and hydrogen peroxide (30% solution in water, 0.88 cm3, 8.60 mmol) were kept in THF (12 cm3) and water (4 cm3) at room temperature for 3 h. Sodium sulfite (1.20 g, 11.65 mmol) in water (12 cm3) was added, the THF was removed under reduced pressure and the residue extracted with dichloromethane (3  10 cm3). The combined organic layers were washed with brine, dried (MgSO4) and concentrated to give the recovered chiral auxiliary (200 mg, 0.93 mmol, 63%). The aqueous layers were acidified to pH 1 with hydrochloric acid solution (3 mol dm–3) and extracted with ethyl acetate (3  15 cm3). The combined organic layers were washed with brine, dried (MgSO4) and concentrated under reduced pressure to give the *hydroxy acid* (0.239 g, 87%); *R*f[Et2O-light petroleum (bp 40-60 °C) 1:1) baseline; **max(film)/cm–1 3500-2500 (OH) and 1713 (CO); **H(400 MHz; CDCl3) 5.05 (1 H, br d, *J* 9.8, C=CH), 3.48 (1 H, t, *J* 6.4, C*H*OH), 2.66-2.52 (2 H, m, 2  C*H*Me), 1.71 (3 H, d, *J* 1.1, C=C*Me*AMeB), 1.62 (3 H, d, *J* 1.1, C=CMeA*Me*B), 1.23 (3 H, d, *J* 7.2, HO2CCH*Me*) and 1.00 (3 H, d, *J* 6.8, CH*Me*C=C); **C(100 MHz; CDCl3) 179.9, 134.4, 124.7, 65.9, 42.9, 36.1, 25.9, 18.2, 17.9 and 14.7; *m*/*z* (EI) 187 (42%, M+ + H), 169 (53, M – H2O), 113 (90, M – HO2CCHMe), 83 (100, CHMeCHCMe2) and 55 (79, CHCMe2); []D –17.3 (*c*. 1.03 in CHCl3)(Found: M+ + H, 187.1341. C10H18O3 requires *M* + H, 187.1334).

**(3*S*,4*S*)-3-Methyl-4-[(*S*)-4-methylpent-3-en-2-yl]oxetan-2-one 77**

Similarly to the preparation of the -lactone **71**, the hydroxy acid (222 mg, 1.19 mmol) gave the *lactone* (130 mg, 65%); *R*f[Et2O*-*light petroleum (bp 40-60 °C) 1:1] 0.57; **max(film)/cm–1 1822 (CO); **H(400 MHz; CDCl3) 4.93 (1 H, dt, *J* 9.3 and 1.2, C=CH), 3.98 (1 H, dd, *J* 6.5 and 4.1, CHO), 3.25 (1 H, qd, *J* 7.6 and 4.1, C*H*Me in lactone), 2.72 (1 H, dqn, *J* 9.3 and 6.8, C*H*Me in side chain), 1.70 (3 H, d, *J* 0.9, C=C*Me*AMeB), 1.63 (3 H, d, *J* 1.1, C=CMeA*Me*B), 1.35 (3 H, d, *J* 7.6, CH*Me* in lactone) and 0.99 (3 H, d, *J* 6.8, CH*Me* in side chain); **C(100 MHz; CDCl3) 172.1, 135.1, 123.4, 82.6, 48.1, 35.9, 25.9, 18.2, 15.8 and 12.7; *m*/*z* (EI) 168 (34%, M+), 83 (100, CHMeCHCMe2) and 55 (37, CHCMe2); []D –32.5 (*c*. 1.0 in CHCl3)(Found: M+, 168.1151. C10H16O2 requires *M*, 168.1150).

**(*R*)-2-[(2*S*,3*S*)-3-Methyl-4-oxooxetan-2-yl]propanal 78**

A continuous flow of ozone was blown over the surface the lactone **77** (50 mg, 0.30 mmol) stirred in dry dichloromethane (50 cm3) at –78 °C under an argon atmosphere for 3 min until a blue colouration developed. Argon was blown through the solution for 2 min, and dimethyl sulfide (2 drops) was added. The solution was stirred for 20 min and warmed up to room temperature. The mixture was washed with water (10 cm3) and brine, dried (MgSO4) and the solvent evaporated off to give a solution of the *aldehyde*; *R*f[light petroleum (bp 40-60 °C)-Et2O, 1:1] 0.05; **max(film)/cm–1 1825 (CO lactone) and 1724 (CO aldehyde); **H(200 MHz; CDCl3) 9.75 (1 H, d, *J* 1.0, aldehyde H), 4.36 (1 H, dd, *J* 7.8 and 4.1, CHO), 3.45 (1 H, qd, *J* 7.5 and 4.1, C*H*Me in ring), 2.90 (1 H, qn, *J* 7.4, C*H*Me in side chain), 1.44 (3 H, d, *J* 7.5, CH*Me* in ring) and 1.20 (3 H, d, *J* 7.4, CH*Me* in side chain); *m*/*z* (EI) 142.0 (25%, M+), 69.1 (100, M – CO2 – CHO)(Found: M+, 142.0626. C7H10O3 requires *M*, 142.0629).

**(2*R*,3*R*,4*R*)-1-(*tert*-Butyldimethylsilyloxy)-2,4-dimethylhex-5-ene-3-ol 82**

Following Roush,44 (*E*)-crotylboronate **79**, derived from (*S*,*S)*-diisopropyl tartarate, (25.5 g, 74.1 mmol), 4Å molecular sieves (0.85 g) and the aldehyde **81**46 (5.4 g, 24.7 mmol) gave a mixture of products. Chromatography [SiO2, EtOAc-light petroleum (bp 40-60 °C), 2:98] gave the major homoallylic alcohol **82**44 (3.6 g, 56%); **H(250 MHz; CDCl3): 5.94 (1 H, dt, *J* 18.0 and 8.4, C*H*=CH2), 5.09-5.02 (2 H, m, CH=C*H*2), 3.75 (1 H, dd, *J* 8.2 and 4.3, C*H*AHBOTBS), 3.61 (1 H, dd, *J* 10 and 7.8, CHA*H*BOTBS), 2.35 (1 H, m, C*H*Me), 1.78 (1 H, m, C*H*Me), 1.11 (3 H, d, *J* 7.0, CH*Me*), 0.90 (9 H, s, tBuSi), 0.83 (3 H, d, *J* 6.9, CH*Me*) and 0.08 (6 H, s, SiMe2);, and a minor isomer (0.9 g, 14%); **H(250 MHz; CDCl3) 5.84 (1 H, ddd, *J* 17.2, 10.2 and 8.4, CH=CH2), 5.13 (1 H, d, *J* 10.2, C*H*AHB), 5.10 (1 H, d, *J* 17.2, CHA*H*B), 3.73-3.70 (2 H, m, C*H*2OTBS), 3.54 (1 H, dt, *J* 8.7 and 2.13, C*H*OH), 2.71 (1 H, d, *J* 2.2, OH), 2.29 (1 H, sextet, *J* 7.3, C=CHC*H*Me), 1.79 (1 H, m, C*H*MeCH2), 0.96 (3 H, d, *J* 6.9, CH*Me*), 0.94 (3 H, d, *J* 7.0, CH*Me*), 0.89 (9 H, s, tBu) and 0.07 (6 H, s, SiMe2).

**(*R*)-3-Benzyloxy-2-methylpropan-1-ol**

Methyl (*S*)-3-benzyloxy-2-methylpropionate46 (7.21 g, 34.6 mmol) in dry tetrahydrofuran (50 cm3) was stirred with lithium aluminium hydride (2.84 g, 74.8 mmol) in dry ether (110 cm3) at 0 C for 30 min. Ethyl acetate (16 cm3), water (16 cm3) and hydrochloric acid solution (3 mol dm–3, 100 cm3) were added cautiously. The mixture was stirred rapidly for 30 min, the layers were separated and the aqueous layer extracted with ether (3  50 cm3). The combined organic layers were washed with sodium hydrogen carbonate solution (50 cm3) and brine (50 cm3), dried (Na2SO4) and evaporated under reduced pressure. The residue was passed through a short silica pad eluting with ether, and the solvent evaporated off under reduced pressure to give the alcohol104 (5.93 g, 95%); *R*f[Et2O-light petroleum (bp 40-60 °C), 1:1] 0.22; **max(film)/cm–1 3450 (O–H) and 1603 (Ph); **H(400 MHz; CDCl3) 7.39-7.27 (5 H, m, Ph), 4.52 (2 H, s, C*H*2Ph), 3.62 (1 H, br t, *J* 4.3, C*H*AHBOH), 3.61 (1 H, br t, *J* 5.2, CHA*H*BOH), 3.55 (1 H, dd, *J* 9.0 and 4.7, C*H*AHBOBn), 3.43 (1 H, dd, *J* 9.0 and 8.1, CHA*H*BOBn), 2.68 (1 H, br s, OH), 2.08 (1 H, br dqq, *J* 8.1, 7.0 and 4.7, C*H*Me) and 0.89 (3 H, d, *J* 7.0, CH*Me*).

**(2*R*,3*R*,4*R*)-1-Benzyloxy-2,4-dimethylhex-5-en-3-ol 83**

Following Paterson,46 *trans*-2-butene (7.0 cm3, 75.0 mmol), (*E*)-crotylboronate **79**, derived from commercial (+)-methoxydiisopinocamphenylborane derived from (–)--pinene (13.8 g, 43.6 mmol) and the aldehyde **81** (5.19 g, 29.1 mmol), prepared (88%) by Swern oxidation, following Meyers,104 of (*R*)-3-benzyloxy-2-methylpropan-1-ol, gave four diastereoisomers, contaminated with more or less of their respective enantiomers (3.57 g, 52%). Chromatography gave the major homoallylic alcohol **83**45,46 (1.79 g, 26%); *R*f[Et2O-light petroleum (bp 40-60 °C), 1:1] 0.48; **max(film)/cm–1 3487 (O–H) and 1637 (C=C); **H(400 MHz; CDCl3) 7.38-7.26 (5 H, m, Ph), 5.92 (1 H, m, not first order, C*H*=CH2), 5.09 (1 H, br s, CH=C*H*AHB), 5.05 (1 H, m, not first order, CH=CHA*H*B), 4.52 (2 H, s, CH2Ph), 3.59 (1 H, dd, *J* 9.2 and 4.5, C*H*AHBOBn), 3.53 (1 H, dd, *J* 9.2 and 7.4, CHA*H*BOBn), 3.38 (1 H, br dt, *J* 7.9 and 3.7, C*H*OH), 3.33 (1 H, d, *J* 3.3, OH), 2.37 (1 H, br qd d, *J* 7.3 and 3.7, C*H*MeCH=CH2), 1.94 (1 H, br sextet-d, *J* 7.3 and 4.5, C*H*MeCH2OBn), 1.11 (3 H, d, *J* 6.0, CH*Me*CH=CH2) and 0.90 (3 H, d, *J* 6.9, CH*Me*CH2OBn), matching literature values, but we did not match the yields and diastereoselectivities reported: 68%, 95:546 and 84%, 95:5.45 We deduce that some racemisation of the aldehyde had taken place, because of residual base in the crotylborane reagent, giving an 80:20 mixture of enantiomers. We were more successful in the closely similar reaction used to make fragment **C**, where we used a crotylborane reagent which had been extracted from acid, and could not have contained any base.

**(2*S*,3*S*,4*R*)-5-(*tert*-Butyldimethylsilyloxy)-3-hydroxy-2,4-dimethylpentanal**

Ozone was passed through the alkene **82** (200 mg, 0.77 mmol) in dry dichloromethane (5 cm3) and methanol (5 cm3) buffered with solid sodium bicarbonate (500 mg) at –78 C for 4 min, until a pale blue colour persisted. Dimethyl sulfide (0.57 cm3, 7.7 mmol) was added, the mixture was stirred for 30 min at –78 °C, and for 3 h at room temperature. The solvents were evaporated off under reduced pressure. The residue was dissolved in water (10 cm3), and extracted with dichloromethane (3 10 cm3). The organic fractions were combined, washed with brine (10 cm3), dried (MgSO4) and evaporated under reduced pressure to give the crude aldehyde (199 mg, 99%), which was used directly in the next step, described as Method B in the preparation of the acid **71** above.

**(2*S*,3*S*,4*R*)-5-Benzyloxy-3-hydroxy-2,4-dimethylpentanoic acid 84**

Ozone was passed through the alkene **83** (0.591 g, 2.52 mmol) in dry dichloromethane (50 cm3) at –78 C for 4 min, until a pale blue-grey colour persisted. Oxygen was then passed through the solution for 1 min until the colour disappeared. Triphenylphosphine (1.32 g, 5.04 mmol) was added, and the solution stirred for 5 min at –78 C and 18 h at room temperature. The solvent was evaporated off, and the residue dried thoroughly at 2 mmHg to give a mixture of triphenylphosphine, triphenylphosphine oxide and the sensitive aldehyde (2.03 g, quantitative yield); *R*f[Et2O-light petroleum (bp 40-60 °C), 1:1] 0.24; **max(film)/cm–1 3406 (OH) and 1721 (C=O). A solution of sodium chlorite (2.73 g, 30.2 mmol) and sodium dihydrogenphosphate dihydrate (3.15 g, 20.2 mmol) in water (12 cm3) was added dropwise to the aldehyde and 2-methylbut-2-ene (2 mol dm–3 solution in THF, 10.1 cm3, 20.2 mmol) in THF (10 cm3) and *tert*-butanol (20 cm3) at 0 C, and stirred vigorously for 2 h. Brine (40 cm3) was added, the layers were separated, and the aqueous layer extracted with ether (4  30 cm3). The combined organic layers were extracted with potassium hydroxide solution (4.1 wt% solution in H2O, 2  50 cm3), the combined basic layers acidified with hydrochloric acid solution (6 mol dm–3, *ca*. 8 cm3) and then extracted with ether (3  30 cm3). The combined extracts were dried (Na2SO4) and concentrated under reduced pressure. The residue was dried by azeotroping from toluene (10 cm3), to give the *hydroxy acid* (458 mg, 72% from alkene); *R*f[Et2O-light petroleum (bp 40-60 °C), 1:1] 0.07; []D20 +2.5 (*c*. 1.19 in CHCl3); **max(film)/cm–1 3458 (OH) and 1714 (C=O); **H(400 MHz; CDCl3) 7.40-7.22 (5 H, m, Ph), 4.54 (2 H, s, C*H*2Ph), 3.65 (1 H, dd, *J* 9.3 and 4.1, C*H*AHBOBn), 3.62 (1 H, dd, *J* 7.5 and 4.5, C*H*OH), 3.51 (1 H, dd, *J* 9.3 and 7.6, CHA*H*BOBn), 2.72 (1 H, qd, *J* 7.2 and 4.5, C*H*MeCO2H), 2.06 (1 H, br qn-d, *J* 7.2 and 4.1, C*H*MeCH2OBn), 1.31 (3 H, d, *J* 7.2, CH*Me*CO2H) and 0.97 (3 H, d, *J* 7.0, CH*Me*CH2OBn); **C(100 MHz; CDCl3) 177.6+ (CO2H), 137.2+, 128.6–, 128.1–, 127.8–, 78.4– (CHOH), 74.8+, 73.7+, 42.9– (*C*HMeCO2H), 36.1– (*C*HMeCH2OBn), 14.8– and 14.0–; *m*/*z* (ESI) 275 (100%, M+ + Na)(Found: M+ + Na, 275.1266. C14H20O4 requires *M* + Na, 275.1259).

**(2*S*,5*S*,6*S*)-2-*tert*-Butyl-6-[(*S*)-1-benzyloxypropan-2-yl]-5-methyl-1,3-dioxan-4-one**

Pivaldehyde (0.20 cm3, 2.29 mmol), isopropoxytrimethylsilane (0.81 cm3, 4.58 mmol) and trimethylsilyl triflate (0.04 cm3, 0.22 mmol) were added successively to a stirred suspension of the hydroxy acid **84** (276 mg, 1.09 mmol) and 4Å molecular sieves (crushed and dried at 2 mmHg with a heat pistol, 0.35 g) in dry dichloromethane (18 cm3) at –78 C. The mixture was stirred for 1.5 h at –78 C, and then warmed slowly to –40 C over 1 h. The powdered sieves were allowed to settle, and the mixture was transferred by cannula to a solution of pyridine (3 cm3) in dichloromethane (20 cm3). The solution was concentrated under reduced pressure, and the mixture (still containing pyridine) chromatographed [SiO2, Et2O-light petroleum (bp 40-60 °C), 1:40 to 1:7] without delay to give the *dioxanone* (284 mg, 81%); *R*f[Et2O-light petroleum (bp 40-60 °C), 1:1] 0.42; []D20 +9.8 (*c*. 2.18 in CHCl3); **max(film)/cm–1 1747 (C=O); **H(400 MHz; CDCl3) 7.37-7.23 (5 H, m, Ph), 4.87 (1 H, s, C*H*tBu), 4.48 (2 H, s, C*H*2Ph), 3.62 (1 H, dd, *J* 9.4 and 7.0, C*H*AHBOBn), 3.52 (1 H, dd, *J* 9.9 and 3.2, C*H*OCHtBu), 3.36 (1 H, dd, *J* 9.4 and 5.4, CHA*H*BOBn), 2.93 (1 H, dq, *J* 9.9 and 7.3, C*H*MeCO2), 2.16 (1 H, qn dd, *J* 7.0, 5.4 and 3.2, C*H*MeCH2OBn), 1.29 (3 H, d, *J* 7.3, CH*Me*CO2), 1.05 (3 H, d, *J* 7.0, CH*Me*CH2OBn) and 0.96 (9 H, s, tBu); **C(100 MHz; CDCl3) 172.4+ (CHMe*C*O2), 138.2+, 128.4–, 127.6–, 127.5–, 107.8– (*C*HtBu), 82.5– (CHMe*C*HCHMe), 73.3+ (*C*H2Ph), 71.0+ (*C*H2OBn), 38.8– (*C*HMeCO2), 35.9– (*C*HMeCH2OBn), 35.4+ (*C*Me3), 23.9– (C*Me*3), 14.9– (*C*HMeCO2) and 13.9– (CH*Me*CH2OBn); *m*/*z* (ESI) 343 (100%, M+ + Na)(Found: M+ + Na, 343.1888. C19H28O4 requires *M* + Na, 343.1885). Hydrogenolysis of this ether is described as Method B in the preparation of (2*S*,5*S*,6*S*)-2-*tert*-butyl-6-[(*S*)-1-hydroxypropan-2-yl]-5-methyl-1,3-dioxan-4-one above.

**(3*R*,4*R*,5*S*)-5-(*tert*-Butyldimethylsilyloxy)-4-(triisopropylsilyloxy)-3,5-dimethylhex-1-ene**

The alcohol **82** (200 mg, 0.8 mmol), 2,6-lutidine (0.37 cm3, 3.2 mmol) and triisopropylsilyl triflate (0.42 cm3, 1.54 mmol) were kept in dichloromethane (10 cm3) at 0 °C for 1 h and at room temperature for 6-12 h. Sodium bicarbonate solution (8 cm3) was added, and the layers were separated. The aqueous layer was extracted with dichloromethane (3  8 cm3), and the combined organic fractions was washed with brine (1 15 cm3), dried (MgSO4) and concentrated under reduced pressure. Chromatography of the residue [SiO2, light petroleum (bp 40-60 °C)] gave the *disilyl ether* (319 mg, 96%); *R*f[EtOAc-light petroleum (bp 40-60 °C), 10:90] 0.65; **max(CHCl3)/cm–1 1650 (C=C); **H(250 MHz; CDCl3) 6.01 (1 H, ddd, *J* 17.5, 10.4 and 7.2, C*H*=CH2), 4.99 (1 H, d, *J* 17.4, C=C*H*AHB), 4.95 (1 H, d, *J* 10.4, C=CHA*H*B), 3.88 (1 H, dd, *J* 5.3 and 2.8, CHOSi), 3.65 (1 H, dd, *J* 10.0 and 6.3, C*H*AHBOTBS), 3.49 (1 H, dd, *J* 10.0 and 6.9, CHA*H*BOTBS), 2.45 (1 H, m, C=CHC*H*Me), 1.89 (1 H, m, C*H*MeCH2O), 1.09 [18 H, s, Si(CH*Me*2)3], 1.09 (3 H, d, *J* 6.9, CH*M*e), 1.07-1.05 [3 H, m, Si(C*H*Me2)3], 0.88 (12 H, s, tBuSi and CH*Me*) and 0.04 (6 H, s, SiMe2); **C(63 MHz; CDCl3) 142.0–, 113.4+, 77.4–, 65.8+, 41.7–, 41.4–, 25.9–, 18.0–, 17.8–, 13.8–, 13.2–, –5.4– and –5.5–; *m*/*z* (ESI) 437.3 (100%, M+ + Na)(Found: M+ + Na, 437.3241. C23H50O2Si2 requires *M* + Na, 437.3247).

**(2*S*,3*R*,4*R*)-3-Triisopropylsilyloxy-2,4-dimethylhex-5-ene-1-ol**

Following Blair,105 the disilyl ether (100 mg, 0.24 mmol) and pyridinium toluene-*p*-sulfonate (18 mg) were kept at 55 °C in absolute ethanol (0.5 cm3) for 16 h. The ethanol was removed under reduced pressure. The residue was dissolved in dichloromethane (5 cm3) and washed with sodium bicarbonate solution (saturated, 2 cm3), brine (1 cm3), dried (MgSO4) and the solvent evaporated under reduced pressure. Chromatography of the residue [SiO2, EtOAc-light petroleum (bp 40-60 °C), 90:10] gave the *alcohol* (70.6 mg, 98%); *R*f[EtOAc-light petroleum (bp 40-60 °C), 10:90] 0.25; **max(CHCl3)/cm–1 3500-3200 (OH) and 1650 (C=C); **H(400 MHz; CDCl3) 5.85 (1 H, ddd, *J* 17.3, 10.4 and 6.8, C*H*=CH2), 5.04 (1 H, dt, *J* 17.3 and 1.7, C=C*H*AHB), 5.01 (1 H, dt, *J* 10.4 and 1.5, =CHA*H*B), 3.85 (1 H, dd, *J* 5.3 and 3.9, CHOSi), 3.69-3.56 (2 H, br m, CHMeC*H*2OH), 2.53 (1 H, m, C*H*Me), 1.91 (1 H, m, C*H*Me), 1.10 [24 H, s and hidden d, Si(CH*Me*2)3 and CH*Me*] and 0.93 (3 H, d, *J* 7.1, CH*Me*); **C(63 MHz; CDCl3) 141.4–, 114.4+, 80.6–, 66.5+, 43.5–, 37.5–, 17.3–, 16.2–, 14.1– and 12.8–; *m*/*z* (ESI) 323.2 (100%, M+ + Na)(Found: M+ + Na, 323.2377. C17H36O2Si requires *M* + Na, 323.2382).

**(3*R*,4*R*,5*R*)-6-Iodo-4-triisopropylsilyloxy-3,5-dimethylhex-1-ene**

The alcohol (80 mg, 0.27 mmol), triphenylphosphine (246 mg, 0.94 mmol) and imidazole (73 mg, 1.08 mmol) were dissolved in dry benzene (6.5 cm3) and ether (13.5 cm3) at room temperature, and iodine (205 mg, 0.8 mmol) was added with vigorous stirring. The mixture was stirred for 30 min and then diluted by n*-*pentane (10 cm3). The mixture was filtered through a silica pad, and the solvents evaporated under reduced pressure. The residue was chromatographed [SiO2, light petroleum (bp 40-60 °C)-Et2O, 99:1] to give the *iodide* (101 mg, 91%); *R*f[EtOAc-light petroleum (bp 40-60 °C), 10:90] 0.5; **max(CHCl3)/cm–1 1650 (C=C); **H(400 MHz; CDCl3) 5.90 (1 H, ddd, *J* 17.4, 10.4 and 7.1, C*H*=CH2), 5.01 (1 H, dt, *J* 17.3 and 1.7, =C*H*AHB), 4.99 (1 H, dt, *J* 10.4 and 1.4, =CHA*H*B), 3.77 (1 H, dd, *J* 5.2 and 2.9, CHOSi), 3.40 (1 H, dd, *J* 9.6 and 4.4, C*H*AHBI), 3.01 (1 H, dd, *J* 9.6 and 8.3, CHA*H*BI), 2.47 (1 H, m, C*H*Me), 1.86 (1 H, m, C*H*Me), 1.08 [24 H, br s, obscured doublet and multiplet, Si(CH*Me*2)3, CH*Me*, Si(C*H*Me2)3] and 1.03 (3 H, d, *J* 6.9. CH*Me*); **C(63 MHz; CDCl3) 141.2–, 114.4+, 79.2–, 42.5–, 41.8–, 18.0–, 16.9–, 13.9– and 13.2+; *m*/*z* (EI) 367.1 (100%, M+ – Pri)(Found: M+ – Pr, 367.0960. C17H35IOSi requires *M* – Pr, 367.0954).

**Methyl (2*S*,3*R*,4*R*)-5-iodo-3-triisopropylsilyloxy-2,4-dimethylpentanoate**

Oxygen was bubbled through a mixture of the iodide (50 mg, 0.12 mmol) and solid sodium bicarbonate in dichloromethane (0.6 cm3) and methanol (0.6 cm3) for 5 min, the solution was cooled to –78 °C, and ozone was bubbled through until a blue colour persisted. Dimethyl sulfide (89 l, 1.2 mmol) was added, the mixture was stirred at –78 °C for 30 min and at room temperature for 3 h. The solvent was evaporated off under reduced pressure. The residue was dissolved in water (2 cm3), and extracted with dichloromethane (3 2 cm3). The organic fractions were combined, washed with brine (1 3 cm3), dried (MgSO4) and evaporated under reduced pressure to give crude aldehyde (49.4 mg, 99%). Following the same method as that used in the preparation of the acid **70** by Method B, the aldehyde (49.4, 0.12 mmol), 2-methyl-2-butene, sodium chlorite (109 mg, 1.2 mmol) and sodium dihydrogen phosphate (110 mg, 0.9 mmol) gave the acid, which was dissolved in dry ether (3 cm3) and an excess of diazomethane added at room temperature until light green colour persisted. Glacial acetic acid was added and the solvent was evaporated off under reduced pressure. The residue was chromatographed [SiO2, light petroleum (bp 40-60 °C)-EtOAc, 98:2] to give the *ester* (51.5 mg, 97%); *R*f[EtOAc-light petroleum (bp 40-60 °C), 10:90] 0.45; **max(CHCl3)/cm–1 1730 (CO); **H(250 MHz; CDCl3) 4.22 (1 H, dd, *J* 10.1 and 3.6, CHOSi), 3.68 (3 H, s, OMe), 3.46 (1 H, dd, *J* 9.6 and 3.6, C*H*AHBI), 3.16 (1 H, dd, *J* 9.5 and 7.9, CHA*H*BI), 2.76 (1 H, qd, *J* 7.2 and 4.3, COC*H*Me), 1.77 (1 H, sextet-d, *J* 6.9 and 3.7, C*H*MeCH2), 1.19 (3 H, d, *J* 7.2, CH*Me*), 1.09 (21 H, s, SiiPr3) and 0.95 (3 H, d, *J* 6.8, CH*Me*); **C(63 MHz; CDCl3) 174.4+, 75.9–, 51.6–, 45.2–, 40.0–, 18.3–, 16.2–, 13.0+, 12.6– and 10.8–.

**(*S*)-4-Trimethylsilylbut-3-yn-2-ol**

Following Noyori,53 with minor modifications, the (*S*,*S*)-ruthenium complex (0.18 g, 0.30 mmol) was added in one portion to a stirred solution of 4-trimethylsilylbut-3-yn-2-one (4.21 g, 30.0 mmol) in isopropanol (HPLC grade, 99.5% pure, water content <0.05%, 1500 cm3) that had been degassed by ten vacuum/argon cycles, and the mixture stirred for 24 h at room temperature under argon. The catalyst dissolved slowly, and the solution became coppery in colour, and eventually orange-yellow. The bulk of the isopropanol was removed by careful evaporation under reduced pressure (40 C at 50 mmHg) and the residue distilled (kugelrohr) first at 50 C at 40 mmHg to remove the residual isopropanol, then at 90-95 C at 25 mmHg. The distillate was taken up in dichloromethane (10 cm3) and washed with water (10 cm3), dried (Na2SO4) and evaporated under reduced pressure to give the alcohol18 (3.69 g, 86%); the enantiomer ratio was 98:2 (CH2SO2 peaks in the 1H NMR spectrum of the camphorsulfonate); *R*f[Et2O-light petroleum (bp 40-60 °C), 1:1] 0.48; []D20 25.9 (*c*. 3.14 in CHCl3); **max(film)/cm–1 3330 (OH), 2176 (CC) and 1251 (SiMe); **H(400 MHz; CDCl3) 4.97 (1 H, q, *J* 6.7, C*H*Me), 1.44 (3 H, d, *J* 6.7, CH*Me*) and 0.15 (9 H, s, SiMe3); **C(100 MHz; CDCl3) 107.8+, 88.3+, 58.7, 24.2 and 0.2. This material was used to make the allenylsilane **3**, as described in reference 18, except that three recrystallisations of the camphorsulfonate were more than enough to raise material derived from this alcohol to enantiomeric purity.

**Methyl (*RS*)-4-formylpentanoate (±)-86**

Methyl 3-methyl-2-piperidinocyclobutanecarboxylate56 (0.3 g, 1.6 mmol) and hydrochloric acid solution (10 mol dm–3, 0.14 cm3) in water (0.4 cm3) were refluxed for 1 h. The mixture was cooled and extracted with ether (3  10 cm3). The combined organic layers were washed with saturated brine (10 cm3), dried (Na2SO4) and concentrated under reduced pressure at room temperature. The residue was distilled to give the ester106 (0.18 g, 90%), bp 50-54 °C at 1 mmHg (lit.,107 92-93 °C at 14 mmHg; *R*f(EtOAc-hexane, 1:1) 0.66; **max(film)/cm–1 1750-1710 br (CO2Me and CHO); **H(90 MHz; CDCl3) 9.40 (1 H, d, *J* 1, CHO), 3.58 (3 H, s, CO2Me), 2.30-1.30 (5 H, m, CH and 2  CH2) and 1.00 (3 H, d, *J* 7.5, CH*Me*).

**Methyl (*RS*)-4-formylhexanoate (±)-87**

Similarly, ethyl 3-ethyl-2-piperidinocyclobutanecarboxylate55,56 (10.0 g, 44.4 mmol) gave the ester54 (5.96 g, 85 %), bp 50-53 °C at 1 mmHg (lit.,56 57-58 °C at 1 mmHg); **max(film)/cm–1 1755-1710 (CO2Me and CHO); **H(250 MHz; CDCl3) 9.54 (1 H, d, *J* 2.4, CHO), 3.70 (3 H, s, OMe), 2.35-2.07 (3 H, m, C*H*CHO and C*H*2CO2Me), 1.95-1.41 (4 H, m, C*H*2Me and C*H*2CH2CO2Me) and 0.89 (3 H, t, *J* 7.5, CH2*Me*).

**Methyl (*RS*)-5-hydroxy-4-methylpentanoate**

Sodium borohydride (1.2 g, 32 mmol) was added to the ester (±)-**86** (12.4 g, 86 mmol) in methanol (50 cm3), with stirring, at 0 °C, and the mixture was stirred at room temperature for 0.5 h. The solvent was evaporated off under reduced pressure, water (30 cm3) was added to the semi-solid residue, and the resultant solution extracted with ether (3  30 cm3). The combined ethereal layers were dried (Na2SO4) and the solvent removed under reduced pressure to give the *ester* (10.0 g, 80%); *R*f(EtOAc-hexane, 1:1) 0.46; **max(film)/cm–1 3600-3100 br (OH) and 1705 (C=O); **H(90 MHz; CDCl3) 3.72 (3 H, s, CO2Me), 3.51 (2 H, d, *J* 6, C*H*2OH), 2.62-1.20 (6 H, m, CH, CH2 and OH) and 0.92 (3 H, d, *J* 6.5, Me); *m*/*z* (EI) 142 (45%, *M*+), 127 (55, *M* – Me) and 110 (100, *M* – Me + OH)(Found: M+, 142.0935. C7H14O3 requires *M*, 142.0939).

**(*RS*)-5-Methyltetrahydropyran-2-one**

Methyl (*RS*)-5-hydroxy-4-methylpentanoate (10.0 g, 68.5 mmol) and sodium hydroxide (5.2 g, 0.13 mol) were refluxed in water (7 cm3) and methanol (34 cm3) for 2.5 h. The mixture was cooled and acidified to pH 3 with hydrochloric acid solution (10%, 10 cm3). The organic layers were extracted with chloroform (3  50 cm3), dried (Na2SO4) and evaporated under reduced pressure. The residue was distilled to give the lactone108 (7.0 g, 91%), bp 48 °C at 0.15 mmHg; *R*f(CH2Cl2) 0.16; **max(film)/cm–1 1740 (C=O); **H(250 MHz; CDCl3) 4.39 (1 H, ddd, *J* 11.8, 4.8 and 1.5, equatorial-C*H*AHBO), 3.92 (1 H, dd, *J* 12.0 and 9.0, axial-CHA*H*BO), 2.75-2.50 (5 H, m, CH and 2  CH2) and 1.05 (3 H, d, *J* 6.0, CH*Me*); *m*/*z* (EI) 114 (26%, *M*+), 84 (39, *M* – CH2O), 70 (33, *M* – CO2) and 56 (100, *M* – OCOCH2)(Found: M+, 114.0691. C6H10O2 requires *M*, 114.0690). Over time, the lactone polymerises, but can be regenerated by refluxing in toluene with a pinch of toluene-*p*-sulfonic acid, followed by distillation.

**(*RS*)-5-Ethyltetrahydropyran-2-one**

Similarly, the ester (±)-**87** (2.29 g, 14.3 mmol) gave methyl (*RS*)-4-hydroxymethylhexanoate (1.99 g, 87%); **max(film)/cm-1 3600-3100 (OH) and 1737 (CO2Me), which was used directly in the next step without further characterisation, giving the lactone61 (1.44 g, 88%), bp 90-94 °C at 1.5 mmHg (lit.,109 64-66 °C at 0.2 mmHg); **max(film)/cm–1 1735 (C=O); **H(250 MHz; CDCl3) 4.31 (1 H, ddd, 11.1, 4.6 and 1.9, equatorial-C*H*ACHBOCO), 3.93 (1 H, dd, *J* 11.1 and 9.6, axial-CHAC*H*BOCO), 2.54 (1 H, ddd, *J* 17.8, 7.1 and 4.9, equatorial-C*H*ACHBCO), 2.45 (1 H, ddd, *J* 17.8, 9.3, and 7.1, axial-CHAC*H*BCO), 1.98 (1 H, m, C*H*AHBCH2CO), 1.79 (1 H, m, MeCH2C*H*), 1.51 (1 H, m, CHA*H*BCH2CO), 1.31 (2 H, dq, *J* 14.8 and 7.2, C*H*2Me) and 0.93 (3 H, t, *J* 7.4, *Me*CH2); *m*/*z* (EI) 128 (10%, *M*+), 98 (16, *M* – C2H6) and 70 (100, *M* – OCOCH2)(Found: M+, 128.0837. C7H12O2 requires *M*, 128.0838).This lactone also polymerises on standing.

**(*RS*)-5,6-Dihydro-5-methylpyran-2-one (±)-88**

(*RS*)-5-Methyltetrahydropyran-2-one (1.0 g, 8.8 mmol) in THF (5 cm3) was added to LDA (9 mmol) in THF (15 cm3) under nitrogen at –78 °C and the mixture stirred for 1 h, The mixture was transferred by cannula into a solution of phenylselenenyl chloride (2.0 g, 10.4 mmol) in THF (5 cm3) at –78 °C over 15 min. The mixture was allowed to warm to room temperature overnight. Ammonium chloride solution was added and the mixture extracted with dichloromethane (3  60 cm3). The organic layers were dried (Na2SO4) and evaporated under reduced pressure. Flash chromatography of the residue (Et2O-hexane, 1:1) gave the lactone (4.4 g, 62%); *R*f(Et2O-hexane, 1:1) 0.19; **max(film)/cm–1 1750 (C=O) and 1610 (Ph); **H(250 MHz; CDCl3) 7.7 (2 H, m, ArH), 7.3 (3 H, m, ArH), 4.4-3.8 (3 H, m, CH2O and C*H*SePh), 2.45-1.15 (3 H, m, C*H*Me and C*H*2CHSePh) and 0.95 (3 H, 2  d, *J* 3.0, Me of two diastereoisomers), which was used without further characterisation. The selenide (0.5 g, 1.9 mmol), hydrogen peroxide (30%, 0.14 cm3) and acetic acid (0.03 cm3) were stirred in THF (1.5 cm3) at 0 °C for 0.5 h, and at room temperature for 15 min. The mixture was poured into cold sodium hydrogen carbonate solution (saturated, 5 cm3). The aqueous layer was extracted with ether (3  10 cm3), the combined organic layers dried (Na2SO4) and evaporated under reduced pressure at room temperature. Immediate and rapid chromatography (SiO2, Et2O-hexane, 1:1) gave the *lactone* (0.2 g, 91%); *R*f(Et2O-hexane, 1:1) 0.28; **max(film)/cm–1 1710 (C=O); **H(250 MHz; CDCl3) 6.85 (1 H, dd, *J* 10.0 and 3.0, C*H*=CHCO), 5.95 (1 H, dd, *J* 10.0 and 1.8, CH=C*H*C=O), 4.45 (1 H, dd, *J* 11.7 and 5.4, C*H*AHBO), 4.17 (1 H, dd, *J* 11.0 and 7.4 CHA*H*BO), 2.62 (1 H, m, C*H*Me) and 1.02 (3 H, d, *J* 7.5, Me). The unsaturated lactone could be stored under nitrogen in a refrigerator for no longer than 20 min, after which it polymerised rapidly.

**(*RS*)-5-Ethyl-5,6-dihydropyran-2-one (±)-89**

Similarly, (*RS*)-5-ethyltetrahydropyran-2-one (1.82 g, 14.2 mmol) gave the selenide (1.59 g), all of which was used directly to give the *lactone* (0.572 g, 80%); *R*f[EtOAc-light petroleum (bp 40-60 °C), 1:2] 0.21; **max(film)/cm–1 1710 (C=O); **H(250 MHz; CDCl3) 6.85 (1 H, dd, *J* 9.8 and 3.8, C*H*=CHCO), 5.98 (1 H, dd, *J* 9.8 and 1.8 Hz, CH=C*H*CO), 4.43 (1 H, ddd, *J* 11.1, 5.0 and 0.8, equatorial-C*H*AHBO), 4.14 (1 H, dd, *J* 11.1 and 7.4, axial-CHA*H*BO), 2.43 (1 H, m, C*H*CH2Me), 1.53 (2 H, m, CHC*H*2Me), 1.01 (3 H, t, *J* 7.4, CH2*Me*); *m*/*z* (EI) 126 (8%, *M*+), 98 (25, *M* – C2H4), 96 (34, *M* – C2H6) and 81 (100, *M* – CO2H)(Found: M+, 126.0689. C7H10O2 requires *M*, 126.0681). This lactone was also unstable, but much less so than its lower homologue.

**(3*RS*,4*RS*,5*SR*)-Tetrahydro-3,5-dimethyl-4-dimethyl(phenyl)silylpyran-2-one (±)-90**

The unsaturated lactone (±)-**88** (52 mg, 0.46 mmol) in THF (1 cm3) was added dropwise to the silylcuprate reagent (0.53 mmol) at –78 °C, and the mixture stirred at this temperature for 2 h. Methyl iodide (0.5 cm3, excess) was added and the mixture stirred for 4 h. The mixture was warmed to room temperature overnight, and ammonium chloride solution (saturated, 20 cm3) was added. The aqueous layer was extracted with ether (3  20 cm3), and the combined organic layers dried (Na2SO4) and concentrated under reduced pressure. Chromatography (SiO2, hexane-Et2O, 2:1) gave the *lactone* (63 mg, 54%); *R*f(hexane-Et2O, 2:1) 0.18; **max(film)/cm–1 1735 (C=O); **H(250 MHz; CDCl3) 7.50 (2 H, m, ArH), 7.4-7.32 (3 H, m, ArH), 4.01 (1 H, dd, *J* 11.3 and 3.4, axial-C*H*ACHBO), 3.93 (1 H, dd, *J* 11.3 and 3.2, equatorial-CHAC*H*BO), 2.45 (1 H, dq, *J* 10.7 and 6.8, axial-C*H*MeC=O), 2.06-2.01 (1 H, m, C*H*Me), 1.13 (3 H, d, *J* 6.8, CH*Me*C=O), 0.93 (3 H, d, *J* 6.9, CH*Me*), 0.67 (1 H, dd, *J* 10.7 and 5.3, CHSi) and 0.39 (6 H, s, SiMe2); *m*/*z* (EI) 262 (1%, *M*+), 205 (30, *M* – SiMe2), 143 (25, *M* – SiMe2 – Me2) and 135 (100, SiMe2Ph)(Found: M+, 262.1394. C15H22O2Si requires *M*, 262.1389).

**(3*RS*,4*RS*,5*SR*)-5-Ethyl-tetrahydro-3-methyl-4-dimethyl(phenyl)silylpyran-2-one (±)-91**

Similarly, the unsaturated lactone (±)-**89** (0.42 g, 3.33 mmol) gave the *lactone* (0.65 g, 71%); *R*f[light petroleum (bp 60-80 °C)-EtOAc, 2:1] 0.46; **max(film)/cm–1 1730 (C=O), 1260 (SiMe) and 1120 (SiPh); **H(250 MHz; CDCl3) 7.50 (2 H, m, ArH), 7.40-7.34 (3 H, m, ArH), 4.09 (1 H, dd, *J* 11.5 and 2.3, axial-CHA*H*BO), 3.88 (1 H, dd, *J* 11.5 and 3.1, equatorial-CHA*H*BO), 2.46 (1 H, dq, *J* 11.1 and 6.7, MeC*H*), 1.75 (1 H, m, C*H*CH2Me), 1.41 (1 H, ddq, *J* 12.5, 8.6 and 7.2, C*H*AHBMe), 1.18 (1 H, m, CHA*H*BMe), 1.10 (3 H, d, *J* 6.7, *Me*CHCO), 0.77 (3 H, t, *J* 7.2, *Me*CH2CH), 0.70 (1 H, dd, *J* 11.1 and 4.1, CHSi), 0.40 (3 H, s, Si*Me*AMeB) and 0.39 (3 H, s, SiMeA*Me*B); *m*/*z* (EI) 276 (5%, *M*+), 203 (41, *M* – C4H9O) and 135 (100, SiMe2Ph)(Found: M+, 276.1554. C16H24O2Si requires *M*, 276.1545).

**(4*RS*,5*RS*)-Tetrahydro-5-methyl-4-dimethyl(phenyl)silylpyran-2-one (±)-92**

The unsaturated lactone (±)-**88** (77 mg, 0.68 mmol) in THF (1 cm3) was added dropwise at –78 °C over 20 min to lithium bis[dimethyl(phenyl)silyl]cuprate, prepared from the silyllithium reagent (1.08 mol dm–3 solution in THF, 1.44 cm3, 1.56 mmol) and copper(I) cyanide (68 mg, 1.07 mmol). The mixture was stirred at this temperature for 2 h. Saturated ammonium chloride solution (6 cm3) was added at –78 °C and the mixture allowed to warm to room temperature. The mixture was extracted with ether (3  10 cm3), the combined organic layers were washed with saturated sodium chloride solution (10 cm3), dried (Na2SO4) and concentrated under reduced pressure. Chromatography (SiO2, hexane-Et2O, 2:1) gave the *lactone* (160 mg, 94%); *R*f(hexane-Et2O, 2:1) 0.15; **max(film)/cm–1 1780 (C=O); **H(250 MHz; CDCl3) 7.48 (2 H, m, ArH), 7.39-7.35 (3 H, m, ArH), 4.05 (1 H, dd, *J* 11.3 and 4.4, equatorial-C*H*ACHBO), 3.91 (1 H, dd, *J* 11.3 and 5.8, axial-CHAC*H*BO), 2.50 (1 H, dd, *J* 16.0 and 6.8, equatorial-C*H*AHBC=O), 2.26 (1 H, dd, *J* 16.1 and 11.1, axial-CHA*H*BC=O), 2.01 (1 H, m, C*H*Me), 1.02 (1 H, m, CHSi), 0.92 (3 H, d, *J* 6.8, CH*Me*), 0.34 (3 H, s, Si*Me*AMeB) and 0.32 (3 H, s, SiMeA*Me*B); *m*/*z* (EI) 248 (8%, *M*+), 233 (33, *M* – Me), 191 (58, *M* – SiMe2) and 135 (100, SiMe2Ph)(Found: C, 67.4; H, 7.71; M+, 248.1228. C14H20O2Si requires C, 67.7; H, 8.12% *M*, 248.1233).

**(4*RS*,5*RS*)- and (4*S*,5*S*)-5-Ethyl-tetrahydro-4-dimethyl(phenyl)silylpyran-2-one 93**

**Method A.** Similarly, the unsaturated lactone (±)-**89** (1.82 g, 14.45 mmol) gave the racemic *lactone* (2.66 g, 71%); *R*f[EtOAc-light petroleum (bp 40-60 °C), 1:9] 0.18 and (hexane-Et2O, 2:1) 0.64; **max(film)/cm–1 1730 (C=O), 1260 (SiMe) and 1120 (SiPh); **H(400 MHz; CDCl3) 7.45 (2 H, m, ArH), 7.35 (3 H, m, ArH), 4.09 (1 H, dd, *J* 11.5 and 3.8, C*H*ACHBO), 3.95 (1 H, dd, *J* 11.5 and 4.0, CHA*H*BO), 2.42 (1 H, dd, *J* 15.5 and 6.7, C*H*ACHBCO), 2.26 (1 H, dd, *J* 15.5 and 11.6, CHAC*H*BCO), 1.75 (1 H, m, C*H*CH2Me), 1.35 (2 H, m, C*H*2Me), 1.03 (1 H, m, CHSi), 0.98 (3 H, t, *J* 7.4, CH2*Me*), 0.32 (3 H, s, Si*Me*AMeB) and 0.31 (3 H, s, SiMeA*Me*B); *m*/*z* (EI) 233 (13%, *M*+ – Et), 193 (15), 191 (15) and 135 (100, SiMe2Ph)(Found: M+ – Et, 233.1000. C15H22O2Si requires *M* – Et, 233.0998).

**Method B.** Freshly distilled cyclohexene (0.505 cm3, 5 mmol) was added to the borane-THF complex (0.66 mol dm–3 solution in THF, 3.79 cm3, 5 mmol) at 0 °C under argon. After 1 h, a dense white precipitate had formed and a solution of the allylsilane **118** (69 mg, 0.25 mmol) in THF (2 cm3) was added. The mixture was stirred for 20 h at room temperature then cooled to 0 °C. Sodium hydroxide solution (3 mol dm–3 in water, 1.9 cm3) and hydrogen peroxide (30%, 1.9 cm3) were added, and the mixture was heated at 50 °C for 1 h. The mixture was cooled to room temperature, acidified with hydrochloric acid solution (3 mol dm–3) and extracted with dichloromethane (4  25 cm3). The combined extracts were dried (Na2SO4) and the solvents evaporated under reduced pressure. Chromatography of the residue (SiO2, EtOAc-hexane, 1:3) gave the enantiomerically enriched (4S,5S)-*lactone* (33.6 mg, 51%); *R*f(EtOAc-hexane, 1:3) 0.30; []D +38.8 (*c*. 1.13 in CHCl3); identical with the racemic sample; **C(100 MHz; CDCl3) 174.2, 135.8, 133.8, 129.6, 128.0, 69.6, 35.5, 29.5, 27.2, 23.0, 11.4, –5.1 and –5.4; *m*/*z* (EI) 262 (3.3%, M+), 247 (2, M – Me), 233 (23, M – Et), 191 (15, M – C4H7O) and 135 (100, PhMe2Si)(Found: M+, 262.1386. C15H22O2Si requires *M*, 262.1389).

**(3*RS*,4*SR*,5*RS*)-Tetrahydro-4-hydroxy-3,5-dimethylpyran-2-one (±)-94**

Experiment carried out by P. E. J. Sanderson. Bromine was added dropwise to a stirred solution of the lactone **90** (51 mg, 0.195 mmol) and anhydrous sodium acetate (0.10 g) in peracetic acid (1 cm3) at 0 °C until the lactone had been consumed (TLC). More peracetic acid (1 cm3) was added and the solution was stirred at 30 °C for 1 h, and at room temperature for 17 h. Ether (20 cm3) and powdered sodium thiosulfate (1 g) were added, and the mixture was stirred vigorously for 15 min, filtered through Celite, and the solvents evaporated under reduced pressure. The residue was chromatographed (PLC, EtOAc) to give the alcohol110 (21 mg, 75%) as prisms, mp 52-53 °C (from hexane-Et2O); *R*f(EtOAc) 0.5; **max(CH2Cl2)/cm–1 3600 and 3460 (OH) and 1720 (C=O); **H(90 MHz; CDCl3) 4.2 (1 H, dd, *J* 12.0 and 5.0, CHA*H*BOC=O), 3.7 (1 H, dd, *J* 12.0 and 9.0, CHAC*H*BOC=O), 3.2 (1 H, t, *J* 9.0, C*H*OH), 2.6 (1 H, br s, OH), 2.3 (1 H, dq, *J* 9.0 and 7.0, CHC=O), 1.8 (1 H, m, OCH2C*H*Me), 1.3 (3 H, d, *J* 7.0, CH*Me*) and 1.0 (3 H, d, *J* 7.0, CH*Me*) identical with the 1H NMR spectrum of an authentic sample given to us by I. Paterson; *m*/*z* 126 (6%, *M* – H2O), 98 (6, *M* – H2O,CH2O), 87 (25, C4H7O2) and 85 (62, C4H5O2)(Found: *M*+ – H2O, 126.0678. C7H12O3 requires *M* – H2O, 126.0681).

**(3*RS*,4*SR*,5*RS*)-5-Ethyl-tetrahydro-4-hydroxy-3-methylpyran-2-one (±)-95**

Peracetic acid (6.8 cm3) was added dropwise with ice cooling to a mixture of the lactone **91** (0.74 g, 2.68 mmol), potassium bromide (0.38 g, 3.2 mmol) and anhydrous sodium acetate (0.68 g, 8.2 mmol) in glacial acetic acid (6.8 cm3). More sodium acetate (1.1 g) and peracetic acid (20.4 cm3) were added, and the turbid solution was stirred at room temperature for 18 h and at 35 °C for 1 h. Ether (150 cm3) and powdered sodium thiosulfate (15 g) were added and the mixture stirred vigorously for 0.5 h. The mixture was filtered through Celite, and the solvents evaporated under reduced pressure. The residue was taken up in ether (3  30 cm3), washed with sodium hydrogencarbonate solution (3  10 cm3) and brine, dried (Na2SO4) and the solvent evaporated under reduced pressure. The residue was chromatographed [SiO2, EtOAc-light petroleum (bp 40-60 °C), 1:2] to give the *alcohol* (214 mg, 50%); *R*f[EtOAc-light petroleum (bp 40-60 °C), 1:2] 0.08; **max(film)/cm–1 3350 (OH) and 1730 (C=O); **H(250 MHz; CDCl3) 4.41 (1 H, dd, *J* 11.6 and 4.4, equatorial-C*H*AHBO), 3.96 (1 H, dd, *J* 11.6 and 7.5, axial-CHA*H*BO), 3.38 (1 H, dd, *J* 8.8 and 7.3, C*H*OH), 2.48 (1 H, dq, *J* 8.8 and 6.9, C*H*Me), 2.12 (1 H, br s, CHO*H*), 1.85-1.66 (3 H, m, C*H*C*H*2Me), 1.37 (3 H, d, *J* 6.9, CH*Me*) and 0.98 (3 H, t, *J* 7.5, CH2*Me*); **C(63 MHz; CDCl3) 173.0+, 74.8–, 68.4+, 43.8–, 43.4–, 22.2+, 13.5– and 11–; *m*/*z* (EI) 158 (6%, M+) and 140 (22%, M – H2O)(Found: M+, 158.0945. C8H14O3 requires *M*, 158.0942).

**(4*RS*,5*SR*)-Tetrahydro-5-methyl-4-dimethyl(phenyl)silylpyran-2-one (±)-97**

The acetal8 (±)-**96** (129 mg, 0.49 mmol) was stirred for 16 h with molybdenum trioxide (10 mg, 0.07 mmol) and hydrogen peroxide (30%, 2 cm3). The mixture was extracted with chloroform (3  10 cm3), the combined organic layers were dried (Na2SO4) and concentrated under reduced pressure without heating, because of the peroxides. Acetic anhydride (1.8 cm3) and pyridine (8.2 cm3) were added tot he residue and the mixture kept overnight at room temperature. The mixture was poured into water (20 cm3) and extracted with chloroform (3  10 cm3). The combined organic layers were dried (Na2SO4) and evaporated without heating, and the residue chromatographed (SiO2, EtOAc-hexane, 1:1) to give the *lactone* (75 mg, 62%); *R*f(EtOAc-hexane, 1:1) 0.12; **max(film)/cm–1 1720 (C=O); **H(250 MHz; CDCl3) 7.47 (2 H, m, ArH), 7.39-7.25 (3 H, m, ArH), 4.43 (1 H, dd, *J* 10.9 and 3.5, equatorial-C*H*ACHBO), 4.11 (1 H, dd, *J* 10.9 and 2.6, axial-CHAC*H*BO), 2.55 (2 H, d, *J* 9.6, CH2C=O), 1.59 (1 H, td, *J* 9.6 and 3.6, CHSi), 1.01 (3 H, d, *J* 7.2, CH*Me*), 0.37 (3 H, s, Si*Me*AMeB) and 0.36 (3 H, s, SiMeA*Me*B); *m*/*z* (EI) 248 (3.2%, *M*+), 233 (13.1, *M* – Me), 191 (15, *M* – CHOCO) and 135 (100, SiMe2Ph)(Found: M+, 248.1237. C14H20O2Si requires *M*, 248.1233).

**(3*RS*,4*SR*,5*RS*)-5-Ethyl-tetrahydro-3-methyl-4-dimethyl(phenyl)silylpyran-2-one (±)-98**

**Method A.** The lactone (±)-**91** (150 mg, 0.54 mmol) and sodium hydroxide (0.2 g, 5 mmol) were refluxed in methanol (2 cm3) and water (0.3 cm3) for 2 h. The methanol was evaporated off under reduced pressure, the solution cooled and acidified with sulfuric acid (concentrated, 1 cm3). The mixture was diluted with water (10 cm3) and extracted with dichloromethane (10 cm3). The aqueous layer was extracted with dichloromethane (3  20 cm3) and the combined organic fractions dried (Na2SO4) and concentrated to give a mixture of the two lactones (80 mg), which were separated by HPLC to give the lactone (±)-**91** (30 mg, retention time 26 min) and its diastereoisomer (±)-**98** (30 mg, retention time 27.5 min); *R*f[light petroleum (bp 60-80 °C)-EtOAc, 1:1)] 0.21; **max(film)/cm–1 1730 (C=O), 1260 (SiMe) and 1170 (SiPh); **H(250 MHz; CDCl3) 7.50 (2 H, m, ArH), 7.41-7.31 (3 H, m, ArH), 4.31 (1 H, dd, *J* 11.4 and 6.2, equatorial-C*H*AHBO), 3.90 (1 H, dd, *J* 10.98 and 11.11, axial-CHA*H*BO), 2.92 (1 H, qd, *J* 6.7 and 5.4, MeC*H*CO), 1.97 (1 H, m, C*H*CH2Me), 1.33-1.15 (3 H, m, CHSi and CHC*H*2Me), 1.10 (3 H, d, *J* 7.0, *Me*CH), 0.69 (3 H, t, *J* 7.4, CH2*Me*), 0.39 (3 H, s, Si*Me*AMeB) and 0.31 (3 H, s, SiMeA*Me*B); *m*/*z* (EI) 276 (3%, *M*+), 261 (13, *M* – Me), 247 (10, *M* – Et), 205 (74, *M* – C4H7O), 143 (43, *M* – SiMe2Ph) and 135 (100, SiMe2Ph) (Found: M+, 276.1551. C16H24O2Si requires *M*, 276.1546).

**Method B.** Dimethyl(phenyl)silyllithium (1.25 mol dm–3 in THF, 1.73 cm3, 2.17 mmol) was added dropwise to a stirred solution of lactone (±)-**91** (251 mg, 0.90 mmol) in dry THF (2 cm3) under argon at –78 °C, and the mixture kept for 4.5 h at –78 °C. Ammonium chloride solution (10 cm3) was added, and the mixture extracted with ether (2  30 cm3). The combined extracts were washed with brine, dried (MgSO4) and evaporated under reduced pressure. The residue was chromatographed [SiO2, EtOAc-light petroleum (bp 40-60 °C), 1:9] to give the lactones as a (1:1) mixture, with clear signals in the 1H NMR spectrum for both isomers.

**5-Ethyl-5,6-dihydro-3-methylpyran-2-one (±)-99**

**Method A.** The hydroxy lactone (±)-**95** (115 mg, 0.72 mmol), 2,6-lutidine (0.20 cm3, 1.8 mmol) and triisopropylsilyl triflate (0.38 cm3, 1.45 mmol) were kept in dry dichloromethane (12 cm3) under argon at –78 °C for 15 min and at room temperature for 30 min. Ammonium chloride solution (8 cm3) was added and the aqueous layer was extracted with dichloromethane (3  10 cm3). The combined organic fractions were washed with buffer (pH 7, 2  10 cm3), dried (Na2SO4) and the solvent evaporated. The residue was chromatographed [SiO2, EtOAc-light petroleum (bp 40-60 °C), 1:2] to give the *lactone* (90.7 mg, 90%); *R*f[EtOAc-light petroleum (bp 40-60 °C), 1:2] 0.32; **max(film)/cm–1 1710 (C=O); **H(250 MHz; CDCl3) 6.55 (1 H, d, *J* 2.4, C*H*=CMe), 4.37 (1 H, ddd, *J* 10.9, 4.9 and 0.84, equatorial-C*H*AHBO), 4.09 (1 H, dd, *J* 10.9 and 7.7, axial-CHA*H*BO), 2.38 (1 H, m, C*H*CH2Me), 1.91 (3 H, s, HC=C*Me*), 1.48 (2 H, m, C*H*2Me) and 0.99 (3 H, t, *J* 7.5, CH2*Me*); **C(63 MHz; CDCl3) 144.0+, 127.8+, 70.5+, 35.7–, 29.7+, 23.8+, 17.2– and 11.3–; *m*/*z* (EI) 140 (15%, M+)(Found: M+, 140.0837. C8H12O2 requires *M*, 140.0837).

**Method B.** Triflic acid (catalytic amount, *ca*. 0.005 cm3), the hydroxy lactone (15 mg, 0.1 mmol) and benzyl trichloroacetimidate (0.037 cm3, 0.2 mmol) were kept in cyclohexane (1.2 cm3) and dichloromethane (0.6 cm3) at room temperature for 15 h. A similar workup and chromatography gave the same lactone (5.6 mg, 40%)(TLC, 1H NMR) as the only identifiable product.

**(3*RS*,4*RS*,5*SR*)-5-Ethyltetrahydro-3-methyl-4-dimethyl(phenyl)silyl-2*H*-pyran-2-ol (±)-100**

Diisobutylaluminium hydride (DIBAL) (1.0 mol dm–3 in hexane, 0.65 cm3, 0.65 mmol) was added dropwise to the lactone (±)-**91** (61 mg, 0.22 mmol) in toluene (30 cm3) under argon at –78 °C, and the mixture stirred at this temperature for 2 h. The mixture was brought to –20 °C and methanol (10 cm3) was added dropwise. Sodium potassium tartrate (20 cm3) was added and the mixture stirred for 0.5 h. The organic layer was separated and the aqueous layer extracted with ether (3  10 cm3). The combined organic layers were washed with brine, dried (MgSO4) and the solvents evaporated off under reduced pressure. The residue was chromatographed [SiO2, EtOAc-light petroleum (bp 40-60 °C), 1:2] to give the *lactol* (55.5 mg, 90%) as mixture of diastereoisomers (4:1); *R*f[EtOAc-light petroleum (bp 40-60 °C), 1:2] 0.31; **max(film)/cm–1 3350 (OH), 1250 (SiMe) and 1120 (SiPh); **H(250 MHz; CDCl3) major diastereoisomer, probably (2*SR*): 7.49 (2 H, m, ArH), 7.38-7.31 (3 H, m, ArH), 4.36 (1 H, dd, *J* 7.6 and 3.9, C*H*OH), 3.97 (1 H, dd, *J* 11.5 and 4.6, equatorial-C*H*AHBO), 3.21 (1 H, dd, *J* 11.5 and 7.5, axial-CHA*H*BO), 1.60-1.50 (2 H, m, C*H*Me and C*H*CH2Me), 1.29-1.02 (2 H, m, C*H*2Me), 0.90 (3 H, d, *J* 6.5, CH*Me*), 0.70 (4 H, m and t, *J* 7.4, C*H*Si and CH2*Me* ), 0.37 (3 H, s, Si*Me*AMeB) and 0.35 (3 H, s, SiMeA*Me*B), and minor diastereoisomer, probably (2*RS*): 4.82 (1 H, br t, *J* 7.6, C*H*OH), 3.67 (1 H, dd, *J* 11.4 and 7.7, equatorial-C*H*AHBO) and 3.58 (1 H, dd, *J* 11.4 and 4.8, axial-CHA*H*BO); *m*/*z* (EI) 278 (3%, *M*+), 135 (100, SiMe2Ph), 231 (3, *M* – CH(OH)2), 126 34, *M* – [CH(OH)2 + Ph] and 97 (74, C7H13)(Found: M+, 278.1712. C16H26O2Si requires *M*, 278.1702).

**(3*RS*,4*RS*)-3-Allyl-tetrahydro-4-dimethyl(phenyl)silyl-*2H*-pyran-2-ol (±)-103**

Similarly, (2*RS*,3*RS*)-3-allyl-tetrahydro-4-dimethyl(phenyl)silylpyran-2-one (see below) (1.2 g, 4.37 mmol) gave the *lactol* (1.04 g, 87%) as mixture of diastereoisomers (2:1); *R*f[EtOAc-light petroleum (bp 40-60 °C), 1:2] 0.54; **max(film)/cm–1 3350 (OH), 1250 (SiMe) and 1120 (SiPh); **H(250 MHz; CDCl3) major diastereoisomer: 7.50 (2 H, m, ArH), 7.36-7.33 (3 H, m, ArH), 5.69 (1 H, m, C*H*=CH2), 4.99-4.96 (2 H, m, CH=C*H*2), 4.92 (1 H, br s, C*H*OH), 3.92-3.82 (2 H, m, C*H*2O), 2.42-1.68 (3 H, m, C*H*CHOH and C*H*2CH=CH2), 1.59-1.10 (3 H, m, C*H*2CH2O and C*H*Si), 0.37 (3 H, s, Si*Me*AMeB) and 0.34 (3 H, s, SiMeA*Me*B), and minor diastereoisomer: 4.46 (1 H, d, *J* 7.7, C*H*OH), 3.52 (1 H, ddd, *J* 11.0, 4.0 and 2.0, C*H*AHBO) and 3.41 (1 H, td, *J* 11.0 and 4.0, CHA*H*BO). The other peaks merge with those of the other diastereoisomer. **C(63 MHz; CDCl3) 138.0+, 136.2–, 135.2–, 134.0, 133.7–, 129.0–, 128.9–, 128.0–, 127.8–, 116.8+, 116.3+, 98.7–, 91.4–, 66.6+, 60.4+, 42.4–, 41.5–, 36.0+, 34.4+, 27.2+, 27.1+, 24.5–, 20.6–, –3.3– and –3.7–; *m*/*z* (EI) 258 (7%, M+ – H2O), 217 (35, M – CH2CH=CH2) and 135 (100, SiMe2Ph)(Found: M+ – H2O, 258.1456. C16H24O2Si requires *M* – H2O, 258.1453), together with the diol from over reduction (2%).

**(3*RS*,4*SR*)-3,4-Dihydro-3-methyl-4-dimethyl(phenyl)silyl-2*H*-chromen-2-ol (±)-107**

Similarly, (3*RS*,4*SR*)-3,4-dihydro-3-methyl-4-dimethyl(phenyl)silylchromen-2-one (see below) (0.4 g, 1.34 mmol) gave the *lactol* (0.28 g, 70%) as mixture of diastereoisomers (1.5:1); *R*f[EtOAc-light petroleum (bp 40-60 °C), 1:2] 0.57; **max(film)/cm–1 3380 (OH), 1250 (SiMe) and 1112 (SiPh); **H(250 MHz; CDCl3) major diastereoisomer: 7.50-7.30 (5 H, m, Ph), 7.06-6.73 (4 H, m, ArH), 5.04 (1 H, t, *J* 3.8, C*H*OH), 2.90 (1 H, d, *J* 3.8, CHO*H*), 2.34-2.22 (2 H, m, C*H*Me and C*H*Si), 0.98 (3 H, d, *J* 5.5, CH*Me*), 0.34 (3 H, s, Si*Me*AMeB) and 0.30 (3 H, s, SiMeA*Me*B), and minor diastereoisomer: 5.22 (1 H, dd, *J* 6.9 and 2.6, C*H*OH) and 2.86 (1 H, d, *J* 6.9, CHO*H*); **C(63 MHz; CDCl3) 151.8+, 150.5+, 139.3+, 137.1+, 134.1–, 133.9–, 129.3–, 128.8–, 127.9–, 127.6–, 125.9–, 125.6–, 124.3–, 122,3–, 121.1–, 120.6–, 116.9–, 116.5–, 96.6–, 93.7–, 33.7–, 33.2–, 32.6–, 31.0–, 18.8–, 13.6–, 2.9–, –3.2– and –3.5–; *m*/*z* (EI) 298 (15%, M+), 163 (8, M – SiMe2Ph) and 135 (100, SiMe2Ph)(Found: M+, 298.1377. C18H22OSi requires *M*, 298.1389), together with the diol from over reduction (6%).

**5,5-Diethyl-tetrahydro-4-dimethyl(phenyl)silyl-2*H*-pyran-2-ol (±)-110**

Similarly, 5,5-diethyl-tetrahydro-4-dimethyl(phenyl)silylpyran-2-one (see below) (0.42 g, 1.5 mmol) gave the *lactol* (0.35 g, 81%); *R*f[EtOAc-light petroleum (bp 40-60 °C), 1:2] 0.43; **max(film)/cm–1 3350 (OH), 1250 (SiMe) and 1120 (SiPh); **H(250 MHz; CDCl3) 7.53 (2 H, m, ArH), 7.35-7.26 (3 H, m, ArH), 4.90 (1 H, m, C*H*OH), 3.20 (1 H, d, *J* 11.7, C*H*AHBO), 3.19 (1 H, d, *J* 11.7, CHA*H*BO), 2.04-1.80 (2 H, m, C*H*2CHOH), 1.59 (1 H, m, CHSi) 1.42-1.08 (4 H, m, 2  C*H*2Me), 0.85 (6 H, m, 2  CH2*Me*) and 0.38 (6 H, m, SiMe2); **C(63 MHz; CDCl3) 139.0+, 139.3+, 133.8–, 128.9–, 127.7–, 97.2–, 90.6–, 70.4+, 63.1+, 60.4+, 37.5+, 37.3+, 30.2+, 28.-, 28.0+, 27.9+, 27.7+, 27.3+, 26.7+, 22.9–, 21.0–, 14.2–, 8.3–, 8.2–, and 8.0–; *m*/*z* (EI) 292 (18 %, M+) and 274 (22 %, M – H2O)(Found: M+ – H2O, 292.1859. C17H28O2Si requires *M* – H2O, 292.1858).

**(2*RS*,3*RS*)-3-Allyl-tetrahydro-4-dimethyl(phenyl)silylpyran-2-one**

5,6-Dihydropyran-2-one, prepared from the saturated lactone by the method of Sharpless,111 (0.5 g, 5 mmol) in dry THF (5 cm3) was added dropwise to the silylcuprate reagent (6.0 mmol) and kept for 1.5 h at –78 °C. Allyl bromide (2.2 cm3, 25.0 mmol) was added at –50 °C, and the mixture stirred at –78 °C for 1.5 h. The mixture was warmed to room temperature overnight, and ammonium chloride solution (10 cm3) was added. The mixture was filtered, and the residue was rinsed with dichloromethane (5  10 cm3). The aqueous layers were extracted with the dichloromethane (5  10 cm3). The combined organic layers were separated, dried (Na2SO4) and concentrated under reduced pressure. The residue was chromatographed [SiO2, EtOAc-light petroleum (bp 40-60 °C), 1:9] to give the *lactone* (1.23 g, 90%); *R*f[EtOAc-light petroleum (bp 40-60 °C), 1:9] 0.09; **max(film)/cm–1 1730 (C=O), 1260 (SiMe) and 1120 (SiPh); **H(250 MHz; CDCl3) 7.50 (2 H, m, ArH), 7.40-7.34 (3 H, m, ArH), 5.67 (1 H, ddt, *J* 17.0, 10.1 and 6.8, C*H*=CHAHB), 5.05 (1 H, dd, *J* 10.1 and 0.9, CH=C*H*AHB), 4.95 (1 H, d, *J* 17.0, CH=CHA*H*B), 4.23 (2 H, m, C*H*2O), 2.66 (1 H, dt, *J* 8.5 and 5.5, C*H*CO), 2.51 (1 H, m, C*H*AHBCH=CH2), 2.17 (1 H, m, CHA*H*BCH=CH2), 1.89-1.62 (2 H, m, C*H*2CH2O), 1 38 (1 H, m, CHSi) and 0.36 (6 H, s, SiMe2); **C(63 MHz; CDCl3) 173.5+, 136.0+, 134.5–, 133.8–, 129.6–, 128.0–, 127.8–, 118.3+, 69.4+, 41.2–, 37.3+, 24.4+, 22.4–, –4.4– and –4.5–; *m*/*z* (EI) 274 (18 %, M+), 248 (8, M – CH=CH2), 233 (33%, M – CH2CH=CH2) and 135 (100, SiMe2Ph)(Found: M+, 274.1384. C16H22O2Si requires *M*, 274.1388).

**(3*RS*,4*SR*)-3,4-Dihydro-3-methyl-4-dimethyl(phenyl)silylchromen-2-one**

Similarly, coumarin (1.0 g, 6.85 mmol) in dry THF (15 cm3) was added dropwise to the silylcuprate reagent (8.2 mmol), and methyl iodide (34.2 mmol, 2.2 cm3) was added to give the *lactone* (1.26 g, 61%); *R*f[EtOAc-light petroleum (bp 40-60 °C), 1:9] 0.22; *v*max(film)/cm–1 1732 (C=O), 1261 (SiMe) and 1119 (SiPh); **H(250 MHz; CDCl3) 7.44-7.32 (5 H, m, ArH), 7.16 (1 H, td, *J* 7.7 and 1.6, ArH), 7.05-6.97 (2 H, m, ArH), 6.88 (1 H, dd, *J* 7.4 and 1.2, ArH), 2.98 (1 H, qd, *J* 7.2 and 0.7, C*H*Me), 2.36 (1 H, s, CHSi), 1.17 (3 H, d, *J* 7.2, CH*Me*) and 0.29 (6 H, s, SiMe2); *m*/*z* (EI) 296 (26 %, M+), 281 (80, M+ – Me) and 135 (95, SiMe2Ph)(Found: M+, 296.1237. C18H20O2Si requires *M*, 296.1232).

**5,5-Diethyl-tetrahydro-4-dimethyl(phenyl)silylpyran-2-one**

Similarly, 5,5-diethyl-5,6-dihydropyran-2-one (see below) (0.49 g, 3.18 mmol) in THF (3 cm3) was added dropwise to the silylcuprate reagent (3.84 mmol), and quenched with ammonium chloride solution (15 cm3) to give the *lactone* (0.45 g, 49 %); *R*f(EtOAc-hexane, 1:9) 0.06; *v*max(film)/cm–1 1731 (C=O), 1260 (SiMe) and 1120 (SiPh); **H(250 MHz; CDCl3) 7.50 (2 H, m, ArH), 7.38-7.26 (3 H, m, ArH), 4.02 (1 H, d, *J* 11.5, C*H*ACHBO), 3.95 (1 H, d, *J* 11.5, CHA*H*BO), 2.50 (1 H, dd, *J* 17.3 and 8.0, C*H*ACHBCO), 2.43 (1 H, dd, *J* 17.3 and 9.4, CHAC*H*BCO), 1.63-1.20 (5 H, m, 2  C*H*2Me and C*H*Si), 0.82 (3 H, t, *J* 7.5, CH2*Me*), 0.80 (3 H, t, *J* 7.5, CH2*Me*), 0.42 (3 H, s, Si*Me*AMeB) and 0.42 (3 H, s, SiMeA*Me*B); **C(63 MHz; CDCl3) 173.1+, 137.8+, 133.8–, 129.0–, 128.0–, 74.9+, 38.6+, 29.2+, 28.1+, 27.9+, 27.0–, 8.0–, –1.6– and –2.6–; *m*/*z* (EI) 291 (25 %, M+ + H), 275 (35, M+ + H – O) and 135 (100, SiMe2Ph)(Found: M+ + H, 291.1762. C17H26O2Si requires *M* + H, 291.1780).

**2-Ethyl-2-(hydroxymethyl)butyl 2-bromoacetate**

Bromoacetyl bromide (1.98 cm3, 22.7 mmol) in dichloromethane (20 cm3) was added dropwise under argon to 2,2-diethylpropane-1,3-diol (3.0 g, 22.7 mmol) and triethylamine (3.15 cm3, 22.7 mmol) in dichloromethane (50 cm3) over a 10 min period. A mild exotherm (+10 °C) took place and triethylamine hydrochloride precipitated. The mixture was stirred for 2 h, the solid was filtered off, and the filtrate washed with sodium hydrogen carbonate solution (saturated, 2  10 cm3). The organic layer was washed with brine (3  10 cm3), dried (Na2SO4), and the solvent evaporated off under reduced pressure. The residue was chromatographed (SiO2, EtOAc-hexane, 1:4) to give the mono *ester* (2.0 g, 35%); *R*f(EtOAc-hexane, 1:2) 0.35; **max(film)/cm–1 3500-3100 (OH) and 1750 (C=O); **H(250 MHz; CDCl3) 4.07 (2 H, s, C*H*2OCO), 3.84 (2 H, s, CH2Br), 3.40 (2 H, d, *J* 6.1, C*H*2OH), 1.81 (1 H, m, OH), 1.33 (4 H, m, 2  C*H*2Me) and 0.84 (6 H, t, *J* 7.5, 2  CH2*Me*); **C(63 MHz; CDCl3) 167.7+, 67.9+, 64.3+, 41.4–, 25.6+, 22.1+ and 6.9–; *m*/*z* (EI) 253 (35%, M+ + H)(Found: M+ + H, 253.0439. C9H17O3Br requires *M* + H, 253.0439).

**2-Ethyl-2-formylbutyl 2-bromoacetate**

Pyridinium chlorochromate (53 mg, 0.24 mmol) suspended in dichloromethane (5 cm3), and the mono ester (31 mg, 0.12 mmol) were stirred for 2 h at room temperature. The black mixture was diluted with anhydrous ether (10 cm3), the solvent was decanted, and the black solid was washed twice with ether. The ether layers were washed with brine, dried (MgSO4) and concentrated under reduced pressure. The residue was chromatographed [SiO2, EtOAc-light petroleum (bp 40-60 °C), 1:2] to give the *aldehyde* (21.9 mg, 73%); *R*f[EtOAc-light petroleum (bp 40-60 °C), 1:2] 0.57; **max(film)/cm–1 1738 (C=O); **H(250 MHz; CDCl3) 9.50 (1 H, s, CHO), 4.29 (2 H, s, OCH2CO), 3.82 (2 H, s, CH2Br), 1.70-1.55 (4 H, m, 2  C*H*2Me) and 0.86 (6 H, t, *J* 7.5, 2  CH2*Me*); **C(63 MHz; CDCl3) 204.0–, 176.0+, 65.1+, 49.8+, 25.0+, 22.5+ and 8.0–; *m*/*z* (EI) 250 (80%, M+)(Found: 250.0215, M+. C9H15BrO3 requires *M*, 250.0204).

**5,5-Diethyl-5,6-dihydropyran-2-one**

2-Ethyl-2-formylbutyl 2-bromoacetate (2.98 g, 11.2 mmol) and triphenylphosphine (8.8 g, 33.58 mmol) were stirred in dry toluene (50 cm3) under nitrogen at room temperature for 5 h. The solvent was decanted off, and the residue was washed with toluene and dried to give the phosphonium salt, which was kept with triethylamine (1.6 cm3, 11.2 mmol) in dry dichloromethane at room temperature for 1.5 h. The solvent was evaporated off under reduced pressure, the residue was added to water, and extracted with ether (2  20 cm3). The combined extracts were washed with brine, dried (Na2SO4) and concentrated under reduced pressure. The residue was chromatographed (SiO2, EtOAc-hexane, 1:2) to give lactone112 (0.51 g, 30 %); *R*f(EtOAc-hexane, 1:2) 0.38; **max(film)/cm–1 1710 (C=O); **H(250 MHz; CDCl3) 6.7 (1 H, d, *J* 9.9, C*H*=CHCO), 5.96 (1 H, d, *J* 9.9, CH=C*H*CO), 4.16 (2 H, s, C*H*2O), 1.51 (4 H, qd, *J* 7.4 and 1.2, 2  C*H*2Me), 1.01 (6 H, t, *J* 7.4, 2  CH2*Me*).

**(1*RS*,2*SR*,3*SR*)-2-[(*RS*)-(1-Hydroxybutan-2-yl)]-3-methylcyclopropanol (±)-102**

Sodium hydride (35 mg) was washed with several portions of hexane (20 cm3), and the flask was alternately evacuated and filled with argon.Dimethyl sulfoxide (0.5 cm3) was introduced by syringe, and the mixture was heated at 75-80 °C for 45 min. The lactol (±)-**100** (0.14 g, 0.5 mmol) in dimethyl sulfoxide(2 cm3) was added at room temperature, and the mixture stirred for 3 h. Water (20 cm3) was added, and the mixture extracted with ether (2  30 cm3). The combined extracts were washed with brine, dried (MgSO4) and concentrated under reduced pressure. The residue waschromatographed [SiO2, EtOAc-light petroleum (bp 40-60 °C), 1:2] to give the *cyclopropanol* (52 mg, 72%); *R*f[EtOAc-light petroleum (bp 40-60 °C), 1:2] 0.15; **max(film)/cm–1 3560 (OH); **H(500 MHz; CDCl3) 3.73 (1 H, dd, *J* 9.6 and 3.4, OC*H*AHB), 3.47 (1 H, t, *J* 9.6, OCHA*H*B.), 3.12 (1 H, dd, *J* 6.8 and 2.6, C*H*OH), 1.54-1.38 (3 H, m, C*H*C*H*2Me), 1.01 (3 H, d, *J* 6.2, CH*Me*), 0.99 (3 H, t, *J* 7.4, CH2*Me*), 0.64 (1 H, dqn, *J* 2.6 and 6.2, C*H*Me) and 0.19 (1 H, dt, *J* 10.0 and 6.5, C*H*CHEt); **C(63 MHz; CDCl3) 67.5+, 55.3–, 44.5–, 30.2–, 25.1+, 21.3–, 16.5– and 11.9–; diacetate *m*/*z* (EI) 228 (21 %, M+), 213 (18, M+ – Me), 185 (60, M+ – Ac) and 169 (40, M+ – OAc)(Found: M+, 228.1376. C12H20O4 requires *M*, 228.1361).

**(1*RS*,2*SR*,3*SR*)-3-Allyl-2-(1-hydroxyethyl)cyclopropanol (±)-104**

Similarly, the lactol (±)-**103** (0.28 g, 1.0 mmol) gave the *cyclopropanol* (0.12 g, 72%); *R*f[EtOAc-light petroleum (bp 40-60 °C), 1:9] 0.10; **max(film)/cm–1 3560 (OH); **H(500 MHz; CDCl3) 5.84 (1 H, ddt, *J* 16.6, 10.2 and 6.3, C*H*=CHAHB), 5.05 (1 H, ddt, *J* 17.1, 3.5 and 1.6, CH=C*H*AHB), 4.95 (1 H, ddt, *J* 10.2, 3.1 and 1.3, CH=CHA*H*B), 3.80 (1 H, dt, *J* 10.0 and 4.1, OC*H*AHB), 3.68 (1 H, td, *J* 10.2 and 3.0, OCHA*H*B), 3.20 (1 H, dd, *J* 6.8 and 2.6, C*H*OH), 2.09 (1 H, dtt, *J* 15.4, 6.4 and 1.2, C*H*CHDCH=CHAHB), 2.02 (1 H, dq, *J* 14.7 and 3.8, C*H*CHDCHAHBO), 1.88 (1 H, dddt, *J* 15.4, 7.5, 6.4 and 1.2, CHC*H*DCH=CHAHB), 1.60 (1 H, dtd, *J* 14.7, 10.3 and 4.3, CHC*H*DCHAHBO), 0.70 (1 H, tdd, *J* 7.3, 5.6 and 2.6, C*H*CH2CH=CH2) and 0.59 (1 H, ddt, *J* 10.3, 6.3 and 5.4, C*H*CH2CH2OH); *m*/*z* (EI) 124 (9%, M+ – H2O) and 101 (39, M+ – CH2CHCH2)(Found: M+ – H2O, 124.0890. C8H14O2 requires *M* – H2O, 124.0888). The stereochemically diagnostic COSY and NOESY cross peaks for this compound are given in Table 1.

**Table 1 Observable and assignable COSY and NOESY cross peaks for the cyclopropanol (±)-**104

|  | 5.84 | 5.05 | 4.95 | 3.80 | 3.68 | 3.20 | 2.09 | 2.02 | 1.88 | 1.60 | 0.70 | 0.59 |
| --- | --- | --- | --- | --- | --- | --- | --- | --- | --- | --- | --- | --- |
| 5.84 |  | Ca | C |  |  |  | C |  | C |  |  |  |
| 5.05 | C |  | C |  |  |  | cb |  | c |  |  |  |
| 4.95 | C | C |  |  |  |  | c |  | c |  |  |  |
| 3.80 |  |  |  |  | C |  |  | C |  | C |  |  |
| 3.68 |  |  |  | C |  |  |  | C |  | C |  |  |
| 3.20 |  |  |  |  |  |  | nc |  | n |  | Cn | CNd |
| 2.09 | C | c | c |  |  |  |  |  | C |  | C |  |
| 2.02 |  |  |  | C | C |  |  |  |  | C |  | C |
| 1.88 | C | c | c |  |  |  | C |  |  |  | C |  |
| 1.60 |  |  |  | C | C |  |  | C |  |  |  | C |
| 0.70 |  |  |  |  |  | Cn | Cn | n | Cn |  |  | C |
| 0.59 |  |  |  |  | n | CN | n | Cn | n | Cn | C |  |

aC strong COSY, bc weak COSY, cn weak NOESY, dN strong NOESY

**(*RS*)-3-Allyltetrahydro-2*H*-pyran-2-ol (±)-105 and (2*RS*,3*RS*)-3-(but-3-enyl)-2-hydroxytetrahydrofuran (±)-106**

Similarly, the lactol (±)-**103** (1.29 g, 4.7 mmol) and sodium hydride (0.33 g), but stirring for 10 h, gave a mixture (86:14) of the -lactol and -lactol (0.58 g, 86 %); *R*f[EtOAc-light petroleum (bp 40-60 °C), 1:2] 0.36-0.29; **max(film)/cm–1 3386 (OH) and 1640 (C=C); **H(250 MHz; CDCl3) of the major -lactol: 5.90-5.64 (1 H, m, C*H*=CH2), 5.08-4.92 (2 H, m, CH=C*H*2), 4.45 (1 H, d, *J* 7.2, OC*H*OH), 4.96 (1 H, m, OC*H*AHB), 3.51 (1 H, m, OCHA*H*B), 2.26 (1 H, m, C*H*CHOH), 2.0-1.82 (2 H, m, C*H*2CH=CH) and 1.65-1.45 (4 H, m, OCH2C*H*2C*H*2); *m*/*z* (EI) 125 (70 %, M+ – OH)(Found: M+ – OH, 125.0963. C8H14O2 requires *M* – OH, 125.0966).

**(3-Methylchroman-2-yloxy)dimethyl(phenyl)silane (±)-109**

Similarly, the lactol (±)-**107** (0.13 g, 0.43 mmol) and sodium hydride (70 mg) stirred for 3 h gave the *lactol silyl ether* (61 mg, 84 %) as a mixture of diastereoisomers (1:1); *R*f[EtOAc-light petroleum (bp 40-60 °C), 1:2] 0.45; **max(film)/cm–1 3556 (OH) and 1600 (Ph); **H(250 MHz; CDCl3) one diastereoisomer: 7.60 (2 H, m, ArH), 7.42-7.36 (3 H, m, ArH), 7.11 (1 H, t, *J* 7.1, ArH), 7.06 (1 H, d, *J* 7.2, ArH), 6.88 (1 H, br t, *J* 7.4, ArH), 6.82 (1 H, d, *J* 7.4, ArH), 5.40 (1 H, d, *J* 2.2, C*H*OH), 3.04 (1 H, dd, *J* 16.3 and 5.7, C*H*AHBCHMe), 2.44 (1 H, dd, *J* 16.3 and 5.7, CHA*H*BCHMe), 2.11 (1 H, m, C*H*Me), 1.12 (3 H, d, *J* 6.8, CH*Me*) and 0.40 (6 H, SiMe2), and the other diastereoisomer: 5.20 (1 H, d, *J* 4.5, C*H*OH), 2.74 (1 H, dd, *J* 16.1 and 11.4, C*H*AHBCHMe), 2.63 (1 H, dd, *J* 16.1 and 6.0, CHA*H*BCHMe) and 1.04 (3 H, d, *J* 6.9, CH*Me*); **C(63 MHz; CDCl3) 133.1–, 129.7–, 129.6–, 129.3–, 127.9–, 127.4–, 121.0–, 120.9–, 116.8–, 116.6–, 96.7–, 94.6–, 31.2–, 28.7+, 27.8+, 16.2–, 16.0– and 0.00–; *m*/*z* (EI) 298 (6 %, M+)(Found: 298.1379, M+. C18H22O2Si requires *M*, 298.1389).

**2,2-Diethyl-hexa-3,5-dien-1-ol 114**

Similarly, the lactol (±)-**110** (0.27 g, 0.93 mmol) and sodium hydride (70 mg) gave the *diene* (100 mg, 65 %); *R*f[EtOAc-light petroleum (bp 40-60 °C), 1:2] 0.53; **max(film)/cm–1 3560 (OH) and 1629 (C=C); **H(250 MHz; CDCl3) 6.34 (1 H, ddt, *J* 16.9, 10.1 and 0.5, C*H*=CH2), 6.05 (1 H, dd, *J* 15.9 and 10.1, CH=C*H*=CH=CH2.), 5.52 (1 H, d, *J* 15.9, C*H*=CH=CH=CH2), 5.15 (1 H, d, *J* 16.9, CH=C*H*AHB), 5.01 (1 H, d, *J* 10.1, CH=CHA*H*B), 3.44 (3 H, s, C*H*2OH), 1.41 (4 H, m, 2  C*H*2Me) and 0.80 (6 H, t, *J* 7.5, 2  CH2*Me*); **C(63 MHz; CDCl3) 140.7+, 139.7–, 137.3–, 130.9–, 66.3+, 44.3+, 25.4+ and 7.7.

**(*RS*)-3-Allyl-tetrahydropyran-2-one and (*RS*)-3-(but-3-enyl)-2-oxotetrahydrofuran**

The mixture of lactols (±)-**105** and (±)-**106** **(**0.56 g, 3.95 mmol) and pyridinium chlorochromate (1.28 g, 5.9 mmol) were stirred at room temperature for 2 h. Ether (20 cm3) was added, the solvent was decanted, and the black solid was washed twice with ether (2  20 cm3). The combined ether layers were washed with brine, dried (MgSO4) and concentrated under reduced pressure. The residue was chromatographed [SiO2, EtOAc-light petroleum (bp 40-60 °C), 1:2] to give a mixture (0.36 g, 65%, 84:16, respectively) of the 3-allyl -lactone113; *R*f[EtOAc-light petroleum (bp 40-60 °C), 1:2] 0.12; **max(film)/cm–1 1735 (C=O) and 1641 (C=C); **H(250 MHz; CDCl3) 5.75 (1 H, ddt, *J* 16.6, 9.5 and 6.9), 5.01-5.07 (2 H, m, CH=C*H*2), 4.34 (1 H, ddd, *J* 11.2, 4.1 and 1.9, OC*H*AHB), 3.98 (1 H, dd, *J* 11.2 and 9.0, OCHA*H*B), 2.62 (1 H, ddd, *J* 17.8, 7.0 and 4.5, C*H*AHBCH=CH2), 2.50 (1 H, ddd, *J* 17.8, 9.5 and 7.0, CHA*H*BCH=CH2), 2.17-1.81 (4 H, m, OCH2C*H*2C*H*AHBC*H*) and 1.57 (1 H, m, OCH2CH2CHA*H*BCH), and the 3-butenyl -lactone;114 *R*f[EtOAc-light petroleum (bp 40-60 °C), 1:2] 0.08; **max(film)/cm–1 1769 (C=O) and 1641 (C=C); **H(500 MHz; CDCl3) 5.79 (1 H, ddt, *J* 17.0, 10.2 and 6.6, C*H*=CH2), 5.08-5.01 (2 H, m, CH=C*H*2), 4.34 (1 H, td, *J* 9.0 and 2.8, OC*H*AHB), 4.18 (1 H, td, *J* 9.0 and 6.8, OCHA*H*B), 2.55 (1 H, m, C*H*CHDCH=CH2), 2.40 (1 H, m, OCH2C*H*EHF), 2.22 (1 H, m, C*H*CO), 2.13 (1 H, CHC*H*DCH=CH2), 2.01 (1 H, dddd, *J* 18.6, 12.3, 7.1 and 4.8, C*H*GHHCHCHDCH=CH2), 1.94 (1 H, m, OCH2C*H*EHF) and 1.55 (1 H, m, CHG*H*HCHCHDCH=CH2), in both cases matching the 1H NMR data reported.

**(*S*)-1-[(*S*)-3-Dimethyl(phenyl)silyl-4-methylenehexanoyl]-5-[(trityloxy)methyl]pyrrolidin-2-one 117**

Following Bond115 and Shapiro,116 *tert*-butyllithium (1.7 mol dm–3 solution in pentane, 47 cm3, 80 mmol) was added dropwise to a solution of the hydrazone (14.08 g, 40 mmol) in THF (50 cm3) at –78 °C under argon, and the mixture was stirred for 1 h at –78 °C, then warmed to 0 °C for 10 min until effervescence had stopped. The buten-2-yllithium solution was added slowly by cannula to a stirred suspension of freshly recrystallised copper(I) bromide-dimethyl sulfide complex (8.24 g, 40 mmol) and anhydrous magnesium bromide (16.56 g, 90 mmol) in THF (100 cm3) and dry dimethyl sulfide (50 cm3) at –40 °C under argon, kept for 30 min, and then cooled to –78 °C. A suspension of the unsaturated imide65 **115** (10.90 g, 20 mmol) and anhydrous magnesium bromide (5.5 g, 30 mmol) in THF (100 cm3) was added slowly. The mixture was stirred at –78 °C for 2 h then allowed to warm to room temperature over 1 h, quenched with saturated ammonium chloride solution (100 cm3) and the mixture extracted with ether (4  300 cm3). The extracts were dried (Na2SO4) and evaporated under reduced pressure. Chromatography (SiO2, EtOAc-hexane, 1:6) gave the *imide* (7.65 g, 64%) as a 93:7 mixture of diastereoisomers; *R*f(EtOAc-hexane, 1:6) 0.36; []D –56.3 (*c*. 1.15 in CHCl3); **max(CH2Cl2)/cm–1 1735 (C=O), 1690 (C=O), 1630 (C=C) and 1110 (SiPh); **H(400 MHz; CDCl3) 7.54-7.19 (20 H, m, 4  Ph), 4.71 (1 H, br s, C=C*H*AHB), 4.59 (1 H, br s, C=CHA*H*B), 4.29 (1 H, m, CHN), 3.51 (1 H, dd, *J* 9.6 and 4.1, C*H*AHBOTr), 3.34 (1 H, dd, *J* 17.4 and 10.9, CHSiC*H*AHBCO), 3.08 (1 H, dd, *J* 9.6 and 2.5, CHA*H*BOTr), 3.03 (1 H, dd, *J* 17.4 and 4.6, CHSiCHA*H*BCO), 2.85 (1 H, ddd, *J* 17.9, 11.1 and 9.8, CH2C*HA*HBCO), 2.38 (1 H, ddd, *J* 17.9, 9.8 and 1.5, CH2CHA*H*BCO), 2.34 (1 H, dd, *J* 10.9 and 4.6, CHSi), 1.97-1.74 (4 H, m, MeC*H*2 and C*H*2CH2CO), 0.92 (3 H, t, *J* 7.4, CH2*Me*), 0.36 (3 H, s, Si*Me*AMeB) and 0.34 (3 H, s, SiMeA*Me*B); **C(100 MHz; CDCl3) 176.2+, 173.4+, 152.3+, 143.6+, 137.6+, 134.1–, 129.0–, 128.5–, 127.8–, 127.5–, 127.0–, 105.6+, 86.9+, 63.8+, 56.8–, 37.3+, 33.1+, 30.9+, 30.8–, 21.3+, 11.9–, –4.0– and –5.0–; *m*/*z* (EI) 601 (1.7%, M+), 358 (55, M – Ph3C), 245 (30, EtC=CH2CH(PhMe2Si)CH2CO), 243 (100, Ph3C) and 135 (40, PhMe2Si)(Found: M+, 601.3000. C39H43NO3S requires *M*, 601.3013).

**Methyl (*S*)-3-dimethyl(phenyl)silyl-4-methylenehexanoate 118**

Methylmagnesium bromide (3 mol dm–3 solution in Et2O, 12 cm3, 36 mmol) was added to dry methanol (2.43 cm3, 60 mmol) in THF (30 cm3) under argon at 0 °C. After 15 min, a solution of the imide **117** (7.21 g, 12 mmol) in THF (45 cm3) was added. The mixture was stirred at room temperature for 24 h, quenched with saturated ammonium chloride solution (100 cm3) and extracted with dichloromethane (3  200 cm3). The extracts were dried (Na2SO4) and evaporated under reduced pressure. Chromatography (SiO2, EtOAc-hexane, 1:19 then EtOAc) gave the *ester* (2.87 g, 87%); *R*f(EtOAc-hexane, 1:3) 0.57; []D –63.6 (*c*. 1.10 in CHCl3); **max(CH2Cl2)/cm–1 1730 (C=O), 1630 (C=C) and 1110 (SiPh); **H(400 MHz; CDCl3) 7.50-7.48 (2 H, m, ArH), 7.37-7.32 (3 H, m, ArH), 4.75 (1 H, br s, C=C*H*AHB), 4.52 (1 H, br s, C=CHA*H*B), 3.56 (3 H, s, CO2Me), 2.53 (1 H, dd, *J* 15.9 and 12.0, C*H*AHBCO), 2.41 (1 H, dd, *J* 15.9 and 4.5, CHA*H*BCO), 2.21 (1 H, dd, *J* 12.0 and 4.5, CHSi), 1.86 (2 H, br q, *J* 7.3, C*H*2Me), 0.95 (3 H, t, *J* 7.3, CH2*Me*), 0.31 (3 H, s, Si*Me*AMeB) and 0.29 (3 H, s, SiMeA*Me*B); **C(100 MHz; CDCl3) 173.7, 151.9, 137.2, 133.9, 129.2, 127.7, 105.9, 51.4, 34.7, 31.9, 30.9, 11.7, –4.1 and –5.3; *m*/*z* (EI) 276 (11.6%, M+), 135 (100, PhMe2Si) and 74 (10, CH2=C(OH)OMe)(Found: M+, 276.1543. C16H24O2Si requires *M*, 273.1546), and the recovered chiral auxiliary (3.45 g, 81 %). This allylsilane isomerised on standing to the isomeric allylsilanes (*E*)- and (*Z*)-methyl (3*S*)-4-methyl-3-dimethyl(phenyl)silylhex-4-enoate. The three isomers were inseparable by column chromatography, but distinctive signals identified these products; **H(250 MHz; CDCl3) 7.58-7.42 (2  2 H, m, ArH both isomers), 7.39-7.31 (2  3 H, m, ArH, both isomers), 5.21 (1 H, br q, *J* 6.0, MeC*H*=CMe, minor isomer), 5.02 (1 H, br q, *J* 6.5, MeC*H*=CMe, major isomer), 3.56 (3 H, s, CO2Me, minor isomer), 3.55 (3 H, s, CO2Me, major isomer), 2.78 (1 H, dd, *J* 4.5 and 11.5, CHSi, minor isomer), 2.56-2.28 (2 H, m, C*H*2CO, minor isomer, underneath C*H*AHBCO and CHA*H*BCO signals of major isomer), 2.49 (1 H, dd, *J* 11.9 and 15.5, C*H*AHBCO, major isomer), 2.35 (1 H, dd, *J* 4.5 and 15.5, CHA*H*BCO, major isomer), 2.18 (1 H, dd, *J* 4.5 and 11.5, CHSi, major isomer), 1.16-1.48 (2  2  3 H, 2  s and 2  d, *Me*CH=C*Me*, both isomers), 0.34 (3 H, s, Si*Me*AMeB, minor isomer), 0.29 (3 H, s, Si*Me*AMeB, major isomer), 0.28 (3 H, s, SiMeA*Me*B, minor isomer) and 0.26 (3 H, s, SiMeA*Me*B, major isomer). When the chiral auxiliary was removed using lithium methoxide, instead of bromomagnesium methoxide, the ester was obtained in only 28% yield, together with the ring-opened product, *methyl* (S)-4-[(S)-3-*dimethyl*(*phenyl*)*silyl*-4-*methylenehexanamido*)-5-(*trityloxy*)*pentanoate* (55%); *R*f(EtOAc-hexane, 1:1) 0.27; **max(CCl4)/cm–1 3414 (NH), 1740 (C=O, ester), 1675 (C=O, amide), 1254 (SiMe2), 1216 (COC) and 1119 (SiPh); **H(250 MHz; CDCl3) 7.67-6.99 (20 H, m, 4  Ph), 5.71 (1 H, d, *J* 8.9, NH), 4.73 (1 H, s, C=C*H*AHB), 4.52 (1 H, s, C=CHA*H*B), 4.03 (1 H, m, CHN), 3.62 (3 H, s, CO2Me), 3.13 (1 H, dd, *J* 9.3 and 3.4, C*H*AHBOTr), 3.04 (1 H, dd, *J* 9.3 and 4.2, CHA*H*BOTr), 2.32-2.20 (4 H, m, CH2CON and C*H*2CO2Me), 2.09 (1 H, dd, *J* 9.4 and 6.7, CHSi), 1.93-1.85 (2 H, m, C*H*2CH2CO2Me), 1.78 (2 H, br q, *J* 7.2, C*H*2Me), 0.87 (3 H, t, *J* 7.3, CH2*Me*), 0.31 (3 H, s, Si*Me*AMeB) and 0.28 (3 H, s, SiMeA*Me*B); *m*/*z* (EI) 601 (1%, M – MeOH), 390 (1.6, M – CPh3), 243 (100, Ph3C) and 135 (70, PhMe2Si)(Found: M+ – CPh3, 390.2112. C40H47NO4Si requires *M* – CPh3, 390.2100).

**Methyl (3*S*,4*R*)-4-methyl-3-dimethyl(phenyl)silylhexanoate 120**

**Method A.** Freshly distilled cyclohexene (3.24 cm3, 32 mmol) was added to the borane-THF complex (1 mol dm–3 solution in THF, 16 cm3) at 0 °C under argon. After 1 h, the allylsilane **118** (1.104 g, 4 mmol) in THF (5 cm3) was added, and the mixture was stirred at room temperature for 24 h. The solvent was distilled off under argon. Dry, distilled propionic acid (10 cm3) was added, and the mixture heated at 140 °C for 4 h. The mixture was cooled to room temperature, diluted with dichloromethane (500 cm3), and washed with saturated sodium bicarbonate solution, until effervescence stopped, and then with brine. The organic layer was dried (Na2SO4) and evaporated under reduced pressure. Chromatography (SiO2, CH2Cl2-hexane, 1:1) gave a mixture of compounds (454 mg) with *R*f(CH2Cl2-hexane, 1:1) 0.3-0.4. The mixture and a catalytic amount of toluene-*p*-sulfonic acid was refluxed in methanol (10 cm3) overnight, cooled and the solvent evaporated off under reduced pressure. Chromatography of the residue (SiO2, CH2Cl2-hexane, 1:1 to methanol-CH2Cl2 2:98) gave the *ester* (111 mg, 10%); *R*f(CH2Cl2-hexane, 1:1) 0.32; []D –17.1 (*c*. 1.06 in CHCl3); **max(CHCl3)/cm–1 1729 (C=O), 1252 (SiMe2) and 1111 (SiPh); **H(400 MHz; CDCl3) 7.51 (2 H, m, ArH), 7.36-7.32 (3 H, m, ArH), 3.52 (3 H, s, CO2Me), 2.34 (1 H, dd, *J* 15.6 and 7.1, C*H*AHBCO), 2.26 (1 H, dd, *J* 15.6 and 6.7, CHA*H*BCO), 1.65-1.57 (2 H, m, CHSi and EtMeC*H*), 1.31 (1 H, m, MeC*H*AHB), 1.21-1.08 (1 H, m, MeCHA*H*B), 0.83 (3 H, t, *J* 7.3, CH2*Me*), 0.78 (3 H, d, *J* 6.9, Et*Me*CH) and 0.32 (6 H, s, SiMe2); **C(100 MHz; CDCl3) 175.1, 138.5, 133.9, 128.9, 127.7, 51.4, 35.2, 30.7, 29.2, 26.8, 17.4, 12.4, –2.9 and –3.3; *m*/*z* (EI) 278 (3.3%, M+), 263 (40, M – Me), 247 (35, M – OMe), 221 (85, M – C4H9), 201 (55 M – Ph) and 135 (100, PhMe2Si)(Found: M+, 278.1712. C16H26O2Si requires *M*, 278.1702), and a mixture of *alcohols* (123 mg, 12%). Pure samples of these were separated by chromatography (SiO2, MeOH-CH2Cl2, 1:99) to give (3S,4R)-4-*methyl*-3-*dimethyl*(*phenyl*)*silylhexan*-1-*ol* **121**; *R*f(MeOH-CH2Cl2, 2:98) 0.44; **max(CCl4)/cm–1 3632 and 3491 (OH), 1250 (SiMe2), 1110 (SiPh) and 701 (Ph); **H(250 MHz; CDCl3) 7.51 (2 H, m, ArH), 7.36-7.31 (3 H, m, ArH), 3.51-3.40 (2 H, m, C*H*2OH), 1.75-1.51 (3 H, m, C*H*2CH2OH and EtMeC*H*), 1.39-1.15 (2 H, m, C*H*2Me), 1.06 (1 H, br s, OH), 1.03 (1 H, td, *J* 6.6 and 2.6, CHSi), 0.83 (3 H, t, *J* 7.2, CH2*Me*), 0.82 (3 H, d, *J* 6.8, Et*Me*CH), 0.33 (3 H, s, Si*Me*AMeB) and 0.30 (3 H, s, SiMeA*Me*B); **C(100 MHz; CDCl3) 139.7, 133.7, 128.8, 127.7, 63.4, 35.4, 29.6, 28.9, 26.3, 17.6, 12.6, –2.4 and –3.2; *m*/*z* (EI) 235 (2.2%, M – Me), 173 (50, M – Ph) and 135 (100, PhMe2Si)(Found: M+, 235.1516. C15H26OSi requires *M*, 235.1519), and (1S,3S,4S)-3-*ethyl*-4-*dimethyl*(*phenyl*)*silylcyclopentanol* **123**; *R*f(MeOH-CH2Cl2, 2:98) 0.39; **max(CCl4)/cm–1 3624 and 3482 (OH), 1250 (SiMe2), 1111 (SiPh) and 700 (Ph); **H(400 MHz; CDCl3) 7.52 (2 H, m, ArH), 7.36-7.31 (3 H, m, ArH), 4.23 (1 H, qn, *J* 5.7, C*H*OH), 2.10 (1 H, ddd, *J* 13.1, 9.1 and 6.0, CHOHC*H*AHBCHSi), 1.92 (1 H, m, EtC*H*), 1.68 (1 H, ddd, *J* 12.9, 7.7 and 5.0, CHOHCHA*H*BCHEt), 1.51-1.35 (4 H, m, MeC*H*AHB, CHOHCHA*H*BCHSi, CHOHC*H*AHBCHEt and OH), 1.04 (1 H, ddq, *J* 13.4, 9.6 and 7.3, CHA*H*BMe), 0.93 (1 H, dt, *J* 10.6 and 9.2, CHSi), 0.81 (3 H, t, *J* 7.3, CH2*Me*), 0.31 (3 H, s, Si*Me*AMeB) and 0.30 (3 H, s, SiMeA*Me*B); **C(100 MHz; CDCl3) 136.7, 133.8, 128.8, 127.7, 73.6, 42.3, 40.8, 38.3, 29.7, 29.5, 12.6, –4.1 and –4.3; *m*/*z* (EI) 248 (5.3%, M+), 233 (21, M – Me), 171 (35, M – Ph), 153 (43, M – Ph – H2O) and 135 (68, PhMe2Si)(Found: M+, 248.1596. C15H24OSi requires *M*, 248.1596). There were strong NOEs between the signals assigned to C*H*OH and CHSi, and none between the signals assigned to C*H*OH and C*H*Et.

**Method B.** In the best run, dicyclohexylborane (20 mmol) and the allylsilane **118** (0.552 g, 2 mmol) in THF (5 cm3) were stirred at room temperature for 30 h, and the solvent distilled off under argon. Dry, distilled propionic acid (15 cm3) was added and the mixture heated at 140 °C for 4 h. The mixture was cooled to room temperature, diluted with dichloromethane (300 cm3) and washed with saturated sodium bicarbonate solution (3  50 cm3) and then with brine (50 cm3). The organic layer was dried (Na2SO4) and evaporated under reduced pressure. Chromatography (SiO2, EtOAc-hexane, 1:19) gave the ester (232 mg, 42%), identical (TLC, 1H NMR) to the earlier sample.

**Hydroboration of the allylsilane (±)-118 with 9-BBNH**

9-Borabicyclo[3.3.1]nonane (9-BBNH) (0.5 mol dm–3 solution in THF, 4 cm3) was added dropwise at 0 °C under argon to a solution of the allylsilane (±)-**118** (55 mg, 0.2 mmol) in THF (1 cm3). The mixture was stirred at room temperature for 22 h, and refluxed for 4 h. The solution was cooled to 0 °C and sodium hydroxide solution (3 mol dm–3, 0.7 cm3) and hydrogen peroxide (30% solution, 0.7 cm3) added, the mixture was heated at 50 °C for 1 h, cooled to 0 °C, acidified with hydrochloric acid (3 mol dm–3), stirred for 1 h at room temperature, and extracted with dichloromethane (3  25 cm3). The extracts were dried (Na2SO4) and concentrated under reduced pressure. Preparative TLC (SiO2, EtOAc-hexane, 1:3) gave (1RS,3RS,4RS)-3-*ethyl*-4-*dimethyl*(*phenyl*)*silylcyclopentanol* (±)-**123** (12.7 mg, 26%), identical (TLC, 1H NMR) with the earlier sample.

**(4*RS*,5*RS*)-5-Ethyl-tetrahydro-4-dimethyl(phenyl)silyl-2*H*-pyran-2-ols 124**

**Method A.** The lactone (±)-**93** (0.30 g, 1.14 mmol) was reduced with DIBAL (1.0 mol dm–3 in hexane,3.4 cm3, 3.4 mmol) in the same way as in the preparation of the lactols (±)-**100**, (±)-**103**, (±)-**107** and (±)-**110** to give the *lactols* (0.24 g, 80%) as a mixture of epimers (2:1); *R*f[EtOAc-light petroleum (bp 40-60 °C), 1:2] 0.35; **max(film)/cm–1 3350 (OH), 1250 (SiMe) and 1120 (SiPh); **H(250 MHz; CDCl3) major diastereoisomer with the OH equatorial: 7.49 (2 H, m, ArH), 7.41-7.33 (3 H, m, ArH), 4.62 (1 H, dd, *J* 9.0 and 2.4, C*H*OH), 4.0 (1 H, dd, *J* 11.4 and 4.0, C*H*AHBO), 3.16 (1 H, dd, *J* 11.3 and 10.1, CHA*H*BO), 1.78-1.59 (2 H, m, C*H*2CHSi), 1.50-1.24 (3 H, m, C*H*2Me and C*H*CH2Me), 1.03-0.93 (1 H, m, CHSi), 0.74 (3 H, t, *J* 7.4, CH2*Me*), 0.34 (3 H, s, Si*Me*AMeB) and 0.30 (3 H, s, SiMeA*Me*B), and, where identifiable, minor diastereoisomer with the OH axial: 5.13 (1 H, t, *J* 2.7, C*H*OH), 3.63 (1 H, t, *J* 11.0, C*H*AHBO), and 3.56 (1H, dd, *J* 11.0 and 4.6, CHA*H*BO) , 0.33 (3 H, s, Si*Me*AMeB) and 0.29 (3 H, s, SiMeA*Me*B); **C(63 MHz; CDCl3) 96.8–, 90.7–, 71.1+, 64.2+, 38.7–, 37.6–, 34.1+, 31.6+, 26.3+, 25.2–, 24.5–, 20.6+, 11.1–, 11.0–, –3.1– and –3.3–, *m*/*z* (EI) 246 (8%, M – H2O), 217 (7, M+ – H2O – Et) and 135 (90 %, SiMe2Ph)(Found: M – H2O, 246.1434. C15H24O2Si requires *M* – H2O, 246.1439).

**Method B.** 2,3-Dimethylbut-2-ene (1 mol dm–3 solution in THF, 2 cm3) was added dropwise at 0 °C under argon to the borane-THF complex (1 mol dm–3 solution in THF, 2 cm3) and the mixture stirred for 1 h at room temperature. The allylsilane (±)-**118** (55 mg, 0.2 mmol) in THF (1 cm3) was added and the mixture stirred at room temperature for 10 h. The solution was cooled to 0 °C, sodium hydroxide solution (3 mol dm–3, 0.67 cm3) and hydrogen peroxide (30% solution in water, 0.67 cm3) were added. The mixture was heated at 50 °C for 1 h then cooled to 0 °C, acidified with hydrochloric acid solution (3 mol dm–3), stirred for 1 h at room temperature, and extracted with dichloromethane (3  25 cm3). The extracts were dried (Na2SO4) and concentrated under reduced pressure. Preparative TLC (SiO2, EtOAc-hexane, 1:3) gave the lactols (37 mg, 70%) as a mixture of epimers (2:1), but curiously in the opposite order; *R*f(EtOAc-hexane, 1:3) 0.3; **H(250 MHz; CDCl3) major diastereoisomer with the OH axial: 7.46 (2 H, m, ArH), 7.35-7.31 (3 H, m, ArH), 5.13 (1 H, dd, *J* 3.9 and 2.0, C*H*OH), 3.69 (1 H, dd, *J* 11.0 and 4.3, OCHA*H*B), 3.53 (1 H, t, *J* 10.8, OC*H*AHB), 1.76-0.81 (2  7 H, m, OH, C*H*Et, C*H*Si, CHSiC*H*2 and C*H*2Me), 0.74 (3 H, t, *J* 7.4, CH2*Me*), 0.31 (3 H, s, Si*Me*AMeB) and 0.27 (3 H, s, SiMeA*Me*B), and, where identifiable, minor diastereoisomer with the OH equatorial: 4.92 (1 H, dd, *J* 9.1 and 3.1, C*H*OH), 3.98 (1 H, dd, *J* 11.5 and 4.2, OCHA*H*B), 3.27 (1 H, dd, *J* 8.2 and 11.5, OC*H*AHB), 0.75 (3 H, t, *J* 7.3, CH2*Me*), 0.33 (3 H, s, Si*Me*AMeB) and 0.29 (3 H, s, SiMeA*Me*B). The spectra, taken several years apart on different machines, although close, are not identical, even allowing for the different proportions of the two hemiacetals. Both spectra appear to be definitive, and both methods of synthesis appear to be unexceptionable. We were unable to compare the samples directly.

**Reduction of methyl (3*S*)-4-ethyl-3-dimethyl(phenyl)silylpent-4-enoate 118**

The ester (138 mg, 0.5 mmol) was stirred with a suspension of lithium aluminium hydride (38 mg, 1 mmol) in ether (4 cm3) under argon at –23 °C for 15 min. Water was added and the mixture extracted with ether (4  30 cm3). The extracts were dried (Na2SO4) and evaporated under reduced pressure. Chromatography of the residue (SiO2, EtOAc-hexane, 1:4) gave impure (3S)-4-*ethyl*-3-*dimethyl*(*phenyl*)*silylpent*-4-*en*-1-*ol* **125** (80 mg, 65%); *R*f(EtOAc-hexane, 1:4) 0.26; **H(250 MHz; CDCl3) (distinctive signals) 7.49 (2 H, m, ArH), 7.36-7.30 (3 H, m, ArH) 4.78 (1 H, d, *J* 1.3, C=C*H*AHB), 4.59 (1 H, br s, C=CHA*H*B), 3.62-3.41 (2 H, m, C*H*2OH), 2.36 (1 H, dd, *J* 12.1 and 3.5, CHSi) and 0.95 (3 H, t, *J* 7.3, CH2*Me*). Further chromatography gave 2-*ethyl*-2-*methyl*-3-*dimethyl*(*phenyl*)*silyltetrahydrofuran* **128** (45 mg) as a mixture of diastereoisomers in the ratio of 43:57; *R*f(EtOAc-hexane, 1:4) 0.6; **max(CCl4)/cm–1 1251 (SiMe2), 1149 (COC) and 1111 (SiPh); **H(400 MHz; CDCl3) 7.54-7.51 (2 H, m, ArH), 7.35-7.32 (3 H, m, ArH), 3.90-3.58 (2 H, m, CH2O), 2.03-1.93 (2 H, m, C*H*2Me), 1.56-1.17 (3 H, m, CHSi and CHSiC*H*2), 1.11 (1.3 H, s, Et*Me*C, minor isomer), 1.05 (1.7 H, s, Et*Me*C, major isomer), 0.87 (1.7 H, t, *J* 7.4, CH2*Me*, major isomer), 0.85 (1.3 H, t, *J* 7.3, CH2*Me*, minor isomer), 0.380 (1.3 H, s, Si*Me*AMeB, minor isomer), 0.377 (1.7 H, s, Si*Me*AMeB, major isomer), 0.377 (1.7 H, s, SiMeA*Me*B, major isomer) and 0.359 (1.3 H, s, SiMeA*Me*B, minor isomer); **C(100 MHz; CDCl3) 138.4 (both isomers), 133.8, 133.7, 128.97, 128.96, 127.7 (both isomers), 85.44, 85.37, 66.7, 65.7, 39.3, 34.9, 34.2, 30.2, 29.4, 29.2, 25.0, 24.6, 8.3, 8.1, –2.85, –2.98, –3.05 and –3.12; *m*/*z* (EI) 233 (31%, M+ – Me), 219 (80, M – CHO) and 135 (100, PhMe2Si)(Found: M+ – Me, 233.1362. C15H24OSi requires *M* – Me, 233.1361), and a mixture of **125** and two other isomers, (E)(3S)-4-*methyl*-3-*dimethyl*(*phenyl*)*silylhex*-4-*en*-1-*ol* **126** and (Z)(3S)-4-*methyl*-3-*dimethyl*(*phenyl*)*silylhex*-4-*en*-1-*ol* **127** in a ratio of 23:57:20 or 23:20:57 (27 mg); *R*f(EtOAc-hexane, 1:4) 0.26; **max(CCl4)/cm–1 3640 and 3450 (OH), 1250 (SiMe2), 1110 (SiPh) and 700 (Ph); **H(250 MHz; CDCl3) 7.53-7.44 (2 H, m, ArH), 7.36-7.30 (3 H, m, ArH), 5.22 (1 H, br q, *J* 6.5, MeC*H*=CMe *cis* or *trans*), 5.12 (1 H, dq, *J* 1.1 and 6.7, MeC*H*=CMe *cis* or *trans*), 4.78 (1 H, d, *J* 1.3, C=C*H*AHB), 4.59 (1 H, br s, C=CHA*H*B), 3.62-3.41 (2 H, m, C*H*2OH all isomers), 2.36 (1 H, dd, *J* 12.1 and 3.5, CHSi terminal allyl silane), 1.85-1.38 (m, all other H), 0.95 (3 H, t, *J* 7.3, CH2*Me*), 0.34, 0.32, 0.30, 0.263, 0.259 and 0.24 (each 3 H, s, SiMe)(0.30 and 0.24 from major isomer); *m*/*z* (EI) 233 (31%, M+ – Me), 219 (80, M – CHO) and 135 (100, PhMe2Si)(Found: M+ – Me, 233.1362. C15H24OSi requires *M* – Me, 233.1361).

**Methyl (2*S*,3*R*,4*R*)-2,4-dimethyl-3-dimethyl(phenyl)silylhexanoate 129**

The ester **120** (111 mg, 0.399 mmol) in THF (3 cm3) was kept with LDA (0.479 mmol) at –78 °C under argon for 2 h. Methyl iodide (0.5 cm3, 8 mmol) was added, the mixture stirred for a further 3 h at –78 °C and allowed to warm to room temperature overnight. Ammonium chloride solution (10 cm3) was added and the mixture was extracted with dichloromethane (4  30 cm3). The extracts were dried (Na2SO4) and evaporated under reduced pressure to give a mixture of the *anti* and *syn* esters (83:17, 1H NMR, OMe signals at 3.58 and 3.60) and starting material (5%). Chromatography (SiO2, EtOAc-hexane, 1:19) gave the anti *ester* (74.2 mg, 64%); *R*f(EtOAc-hexane, 1:19) 0.33; []D –22.2° (*c*. 1.06 in CHCl3); **max(CCl4)/cm–1 1740 (C=O), 1250 (SiMe2), 1170 and 1205 (COC), 1110 (SiPh) and 700 (Ph); **H(400 MHz; CDCl3) 7.55 (2 H, m, ArH), 7.35-7.32 (3 H, m, ArH), 3.58 (3 H, s, CO2Me), 2.67 (1 H, qd, *J* 7.3 and 3.5, C*H*MeCO), 1.65 (1 H, m, EtMeC*H*), 1.46 (1 H, dd, *J* 4.2 and 3.5, CHSi), 1.38 (1 H, dqd, *J* 13.4, 7.4 and 5.0, MeC*H*AHB), 1.17 (1 H, m, under CH*Me*CO, MeCHA*H*B), 1.16 (3 H, d, *J* 7.4, CH*Me*CO), 0.82 (3 H, d, *J* 6.9, Et*Me*CH), 0.75 (3 H, t, *J* 7.3, CH2*Me*), 0.40 (3 H, s, Si*Me*AMeB) and 0.39 (3 H, s, SiMeA*Me*B); **C(100 MHz; CDCl3) 178.1, 140.3, 133.9, 128.6, 127.6, 51.4, 38.4, 34.9, 34.5, 29.8, 18.3, 17.2, 12.1, –1.1 and –1.5; *m*/*z* (EI) 277 (19.4%, M+ – Me), 235 (90, M – EtMeCH), 215 (38, M – Ph) and 135 (100, PhMe2Si)(Found: M+ – Me, 277.1620. C17H28O2Si requires *M* – Me, 277.1661).

**Methyl (2*R*,3*R*,4*R*)-2,4-dimethyl-3-dimethyl(phenyl)silylhexanoate 130**

The *anti* ester (65 mg, 0.223 mmol) in THF (2 cm3) was stirred with LDA (0.557 mmol) at 0 °C under argon for 2 h, and then cooled to –78 °C. Ammonium chloride solution (2 cm3) was added and the mixture extracted with dichloromethane (4 25 cm3). The extracts were dried (Na2SO4) and evaporated under reduced pressure to give a mixture of *syn* and *anti* esters (90:10). Chromatography (SiO2, EtOAc-hexane, 1:19) gave the syn *ester* (33.1 mg, 51%); *R*f(EtOAc-hexane, 1:19) 0.29; []D –3.2° (*c*. 1.10 in CHCl3); **max(CCl4)/cm–1 1735 (C=O), 1250 (SiMe2), 1200 and 1160 (COC), 1110 (SiPh) and 705 (Ph); **H(400 MHz; CDCl3) 7.53 (2 H, m, ArH), 7.34-7.32 (3 H, m, ArH), 3.60 (3 H, s, CO2Me), 2.75 (1 H, dq, *J* 7.1 and 5.6, C*H*MeCO), 1.69 (1 H, dd, *J* 5.6 and 4.9, CHSi), 1.59 (1 H, dqt, *J* 8.4, 6.9 and 4.9, EtMeC*H*), 1.37 (1 H, dqd, *J* 13.6, 7.4 and 5.0, MeC*H*AHB), 1.15 (3 H, d, *J* 7.1, CH*Me*CO), 1.10 (1 H, ddq, *J* 13.6, 8.4 and 7.3, MeCHA*H*B), 0.90 (3 H, d, *J* 6.9, Et*Me*CH), 0.76 (3 H, t, *J* 7.3, CH2*Me*), 0.36 (3 H, s, Si*Me*AMeB) and 0.32 (3 H, s, SiMeA*Me*B); **C(100 MHz; CDCl3) 177.8, 140.3, 133.7, 128.6, 127.6, 51.5, 38.3, 35.3, 43.1, 29.2, 18.3, 16.9, 12.2, –1.1 and –1.2; *m*/*z* (EI) 292 (0.7%, M+), 277 (55, M – Me), 235 (98, M – EtMeCH) and 135 (100, PhMe2Si)(Found: M+, 292.1864. C17H28O2Si requires *M*, 292.1859).

**Methyl (2*S*,3*R*,4*R*)-3-hydroxy-2,4-dimethylhexanoate 131**

The -silyl ester **130** (41 mg, 0.140 mmol), mercuric acetate (50 mg, 0.154 mmol) and peracetic acid (32% w/w solution in acetic acid, 2 cm3) were stirred at room temperature for 5 h. Ether (100 cm3) was added and the mixture washed with sodium thiosulfate solution, water, saturated sodium bicarbonate solution and brine. The ether layer was dried (Na2SO4) and concentrated under reduced pressure. Chromatography of the residue (SiO2, EtOAc-hexane, 1:4) gave the -*hydroxy* *ester* (14.2 mg, 58%); *R*f(EtOAc-hexane, 1:4) 0.27; []D –0.6 (*c*. 1.01 in CHCl3); **max(CHCl3)/cm–1 3689 and 3530 (OH) and 1716 (C=O); **H(400 MHz; CDCl3) 3.69 (3 H, s, CO2Me), 3.65 (1 H, dt, *J* 8.6 and 3.5, C*H*OH), 2.66 (1 H, qd, *J* 7.2 and 3.1, C*H*MeCO2), 2.53 (1 H, d, *J* 3.9, OH), 1.76 (1 H, m, EtMeC*H*), 1.44 (1 H, m, MeC*H*AHB), 1.18 (1 H, m, MeCHA*H*B), 1.15 (3 H, d, *J* 7.2, CH*Me*CO2), 0.89 (3 H, t, *J* 7.4, CH2*Me*) and 0.81 (3 H, d, *J* 6.8, Et*Me*CH); **C(100 MHz; CDCl3) 177.2, 75.0, 51.8, 41.3, 36.8, 24.8, 14.8, 10.9 and 9.6; *m*/*z* (EI) 159 (3.2%, M+ – Me), 143 (5, M – OMe), 117 (63, M – C4H9), 88 (100, EtMeCHCHOH2), 85 (65, EtMeCHC=O) and 57 (63, C4H9)(Found: M+ – Me, 159.1020. C9H18O3 – Me requires *M*, 159.1021). The 2*S*,3*S*,4*S*-isomer has 13C NMR signals for the methyl groups on the stereogenic centres at 14.1 and 15.0, and for the methylene carbon at 22.7, and the 2*R*,3*R*,4*R*-isomer has the corresponding signals at 13.5, 11.5 and 25.9.117

**Methyl (2*R*,3*R*,4*R*)-3-*tert***-**Butyldimethylsilyloxy-2,4-dimethylhexanoate**

The alcohol (10 mg, 0.0575 mmol), 2,6-lutidine (20 l, 0.17 mmol)and *tert*-butyldimethylsilyl triflate (26 l, 0.115 mmol) were kept in dichloromethane (2 cm3) at room temperature under argon for 30 min. Water (1 cm3) was added and the mixture diluted with dichloromethane (50 cm3). The dichloromethane layer was washed with sodium bicarbonate solution, dried (Na2SO4) and concentrated under reduced pressure. Chromatography of the residue (SiO2, EtOAc-hexane, 1:19) gave the *silyl* *ether* (16 mg, 97%); *R*f(EtOAc-hexane, 1:9) 0.46; **max(CCl4)/cm–1 1737 (C=O), 1253 (SiMe2), 1057 (SiO) and 837 (SiMe2); **H(400 MHz; CDCl3) 3.88 (1 H, t, *J* 5.0, CHOSi), 3.64 (3 H, s, CO2Me), 2.59 (1 H, qd, *J* 7.0 and 5.2, C*H*MeCO2Me), 1.52-1.39 (2 H, m, EtMeC*H* and MeC*H*AHB), 1.12 (3 H, d, *J* 7.0, CH*Me*CO2), 1.08-0.97 (1 H, m, MeCHA*H*B), 0.89-0.85 (6 H, m, under tBu, CH2*Me* and Et*Me*CH), 0.87 (9 H, s, tBu), 0.03 (3 H, s, Si*Me*AMeB) and –0.02 (3 H, s, SiMeA*Me*B); **C(100 MHz; CDCl3) 176.2, 76.6, 51.5, 42.4, 40.5, 26.0, 25.0, 18.3, 15.1, 12.5, 12.1, –4.2 and –4.3; *m*/*z* (EI) 289 (0.8%, M+ + H), 273 (4, M – Me), 257 (3, M – OMe), 231 (100, M – tBu), 115 (21, tBuMe2Si) and 75 (65, Me2Si=OH)(Found: M+ + H, 289.2227. C15H33O3 requires *M* + H, 289.2199).

**(2*R*,3*R*,4*R*)-3-***t****ert-*Butyldimethylsilyloxy-2,4-dimethylhexanal 132**

**Method A.** The ester (14 mg, 0.0486 mmol) and DIBAL (73 l of a 1 mol dm–3 in hexane, 0.073 mmol) were stirred in ether (1 cm3) at –98 °C for 90 min. Methanol (200 l) was added, the mixture stirred for a further 10 min and then allowed to warm to room temperature. Saturated potassium sodium tartrate solution (2 cm3) was added and the mixture extracted with ether (3  15 cm3). The extracts were dried (Na2SO4) and concentrated under reduced pressure to give a mixture of the aldehyde and the starting ester. These were not separable by chromatography so the mixture was resubmitted to the reaction conditions. Chromatography (SiO2, EtOAc-hexane, 1:9) then gave a mixture of the starting material and the aldehyde (5.5 mg); *R*f(EtOAc-hexane, 1:9) 0.47; and some over-reduced product (2R,3R,4R)-3-tert-*butyldimethylsilyloxy*-2,4-*dimethylhexanol* (5.2 mg, 41%); *R*f(EtOAc-hexane, 1:9) 0.16; **H(250 MHz; CDCl3) 3.62 (1 H, dd, *J* 5.2 and 2.4, CHOSi), 3.57 (1 H, ddd, *J* 10.2, 8.0 and 5.1, C*H*AHBOH), 3.46 (1 H, m, CHA*H*BOH), 1.88 (1 H, m, C*H*MeCH2OH), 1.76 (1 H, t, *J* 5.1, OH), 1.52 (1 H, m, EtMeC*H*), 1.06 (1 H, m, C*H*AHBMe), 0.87 (1 H, m under tBu, CHA*H*BMe), 0.89 (9 H, s, tBuSi), 0.91-0.84 (9 H, under tBuSi, CH2*Me*, Et*Me*CH and *Me*CHCH2OH), 0.06 (3 H, s, Si*Me*AMeB) and 0.05 (3 H, s, SiMeA*Me*B). The alcohol (5 mg, 0.02 mmol), DMSO (3 l, 0.044 mmol) and oxalyl chloride (2 mol dm–3 solution in CH2Cl2, 11 l, 0.022 mmol) were kept in dichloromethane (200 l) under argon at –78 °C for 45 min. Distilled triethylamine (100 l) was added, the mixture was kept at –78 °C for 10 min, and then allowed to warm to room temperature. Water (1 cm3) was added and the mixture stirred for 10 min then extracted with dichloromethane (3  10 cm3). The organic extracts were washed with hydrochloric acid solution (3 mol dm–3, 2  5 cm3) and sodium bicarbonate solution (2  5 cm3), dried (Na2SO4) and concentrated under reduced pressure. Chromatography of the residue (SiO2, EtOAc-hexane, 1:9) gave the *aldehyde* (3.2 mg, 64%); *R*f(EtOAc-hexane, 1:9) 0.47; **H(400 MHz; CDCl3) 9.73 (1 H, d, *J* 1.0, CHO), 4.00 (1 H, dd, *J* 5.6 and 3.6, CHOSi), 2.46 (1 H, qdd, *J* 6.9, 3.4 and 1.0, C*H*MeCHO), 1.56 (1 H, m, EtMeC*H*), 1.46 (1 H, dqd, *J* 13.3, 7.4 and 3.9, MeC*H*AHB), 1.09 (1 H, m, MeCHA*H*B under CH*Me*CHO), 1.09 (3 H, d, *J* 6.9, CH*Me*CHO), 0.88 (3 H, t, *J* 7.4, CH2*Me*), 0.88 (3 H, d, *J* 6.8, Et*Me*CH), 0.86 (9 H, s, tBu), 0.05 (3 H, s, Si*Me*AMeB) and –0.01 (3 H, s, SiMeA*Me*B).

**Method B.** (2*S*,3*R*,4*R*)-3-(*tert*-Butyldimethylsilyl)oxy-*N*-methoxy-*N*,2,4-trimethylhexanamide (see below) (180 mg, 0.567 mmol) and DIBAL (1 mol dm–3 solution in hexanes, 0.85 cm3, 0.85 mmol) were stirred in THF (5 cm3) at –78 °C under argon for 2 h. Methanol (1 cm3) was added at –78 °C, the mixture was stirred for 5 min, and then allowed to warm to room temperature over 1 h. The mixture was filtered through a Celite plug and washed with methanol. The solvent was removed under reduced pressure, the residue dissolved in ether (10 cm3) and washed with hydrochloric acid solution (0.5 mol dm–3, 10 cm3) and brine, dried (MgSO4), filtered and evaporated. Chromatography [SiO2, light petroleum (bp 40-60 °C)-EtOAc, 10:1] gave the aldehyde (105 mg, 72%); identical (TLC, 1H NMR) with the earlier sample; []D + 32.3 (c. 0.7 in CDCl3); **max(film)/cm–1 2709 (CHO), 1726 (CO), 1253 (SiC), 1099 (SiO) and 835 (SiC); **C(100 MHz; CDCl3) 205.5, 74.9, 50.0, 39.7, 25.9, 25.1, 18.3, 15.5, 11.8, 8.6 and –4.1; *m*/*z* (EI) 257 (6.5%, M+ – H), 217 (100, M – C3H5), 201 (88, M – tBu), 131 (25, OSitBuMe2), 115 (23, SitBuMe2) and 75 (72, Me2SiOH)(Found: M+ – H, 257.1935. C14H29SiO2 requires *M* – H, 257.1936).

**(*S*)-1-[(*R*)- and (*S*)-1-[(*S*)-3-Dimethyl(phenyl)silyl-4-methylenepentanoyl]-5-[(trityloxy)methyl]pyrrolidin-2-ones**

A slurry of the *Z*--silylacryloyl lactam9 (4.0 g, 6.81 mmol) and anhydrous magnesium bromide (6.67g) in dry THF (50 cm3) was added slowly at –78 °C to the cuprate prepared at –20 °C from 2-bromopropene (1.55 cm3, 17.7 mmol) and lithium wire (containing 1% Na, 0.47 g, 20.4 mmol) in dry ether (32 cm3) followed by copper(I) bromide–dimethyl sulfide(1.8 g, 8.85 mmol) in dry THF (50 cm3). The mixture was stirred for 1 h and warmed to 0 °C over 90 min. Saturated ammonium chloride solution (20 cm3) was added dropwise, the mixture filtered through Celite and the filtrate extracted with dichloromethane (4  50 cm3). The combined extracts were washed with sodium hydrogen carbonate solution, dried (Na2SO4) and concentrated under reduced pressure. Chromatography (SiO2,hexane-Et2O, 1:2) gave the 3R-*imide* (3.94 g, 98%) as a mixture (76:24) of diastereoisomers (measured by the integration of the C=CHA*H*B signals in the 1H NMR spectrum); *R*f(hexane-Et2O, 1:2) 0.57; **max(film)/cm–1 1731 (C=O), 1693 (C=O), 1633 (C=C) and 1110 (SiPh); **H(250 MHz; CDCl3) 7.88-7.20 (20 H, m, 4  Ph), 4.79 (1 H, br s, C=C*H*AHB), 4.58 (1 H, br s, C=CHA*H*B), 4.50 (1 H, m, CHN), 3.72-3.40 (2 H, m, C*H*2O), 3.23-2.89 (3 H, m, C*H*SiC*H*2CO), 2.60-2.36 (2 H, m, CH2C*H*2CO), 2.05-1.95 (2 H, m, C*H*2CH2CO), 1.76 (3 H, s, *Me*C=CH2), 0.50 (3 H, s, Si*Me*AMeB) and 0.46 (3 H, s, SiMeA*Me*B); **C(63 MHz; CDCl3) 176.3+, 173.6+, 147.2+, 143.8+, 137.7+, 134.2+, 129.3–, 128.6–, 127.9–, 127.2–, 108.6+, 87.1+, 64.2+, 57.0–, 37.3+, 33.3+, 32.0–, 25.4–, 21.2+, –3.7– and –5.0–; *m*/*z* (FAB) 588 (MH+)(Found: MH+, 588.2933. C38H41NO3Si requires *M* + H, 588.2933). A similar reaction on the *E*-isomer, the imide **115** (2.49 g, 5.51 mmol), gave a mixture (1.06 g, 33%) rich (75:25) in the diastereoisomeric 3-S-*imide*; *R*f[EtOAc-light petroleum (bp 40-60 °C), 1:9] 0.15; **max(film)/cm–1 1731 (C=O), 1693 (C=O), 1633 (C=C) and 1110 (SiPh); **H(250 MHz; CDCl3) 7.88-7.20 (20 H, m, 4  Ph), 4.79 (1 H, br s, C=C*H*AHB), 4.67 (1 H, br s, C=CHA*H*B), 4.38 (1 H, m, CHN), 3.72-3.40 (2 H, m, C*H*2O), 3.23-2.89 (3 H, m, C*H*SiC*H*2CO), 2.60-2.36 (2 H, m, CH2C*H*2CO), 2.05-1.95 (2 H, m, C*H*2CH2CO), 1.76 (3 H, s, *Me*C=CH2), 0.352 (3 H, s, Si*Me*AMeB) and 0.343 (3 H, s, SiMeA*Me*B); **C(63 MHz; CDCl3) 176.3+, 173.4+, 146.9+, 143.8+, 137.7+, 134.2+, 129.2–, 128.6–, 127.9–, 127.2–, 108.0+, 87.1+, 64.0+, 56.8–, 37.3+, 33.3+, 31.7–, 25.2–, 21.2+, –3.7– and –4.7–; *m*/*z* (FAB) 588 (MH+)(Found: MH+, 588.2933. C38H41NO3Si requires *M* + H, 588.2933), confirming the identification of the signals used to measure the ratio of diastereoisomers.

**1*R*,5*S*,7*S*-*N*-{3*R*-[3-dimethyl(phenyl)silyl]-4-methylenepentanoyl}tricyclo[5.2.11,5]-4-aza-10,10-dimethyl-3-thiadecane *S*,*S*-dioxide 134**

2-Bromopropene (9.68 cm3, 109 mmol) was stirred with freshly-cleaned-and-washed (dry hexane, 2  20 cm3) lithium wire (0.5-1.0% Na, 1.64 g, 236 mmol) in dry ether (170 cm3) at–5 C for 40 min, by which time nearly all of the lithium had been consumed. The mixture was cooled to –78 °C, and added by cannula to a stirred suspension of copper(I) iodide118 (10.4 g, 54.5 mmol) (dried at 60 °C and 2 mmHg for 30 min) in dry ether (90 cm3) under argon at –78 °C. This mixture was then allowed to warm to –30 °C over 1.5 h. Meanwhile, in a separate flask, ethylaluminium dichloride (1 mol dm–3 solution in hexanes, 54.5 cm3, 54.5 mmol) was added over 20 min to a solution of the imide **133**95 (7.33 g, 18.2 mmol) in dry THF (160 cm3) under argon, keeping the temperature below –60 °C. The solution of the cuprate at –78 °C was added by cannula over 20 min, keeping the temperature below –70 °C, and the mixture was stirred at –78 °C for 40 min. The mixture was warmed to –40 C over 1.75 h, and then allowed to warm to 0 °C over 40 min. Ice-cold basic ammonium chloride solution (saturated, 180 cm3) was added with cooling in ice-water. The layers were separated, and most of the upper organic layer carefully decanted off. The remaining suspension was filtered through a silica pad, and the solid washed with ether (3  150 cm3), and each wash was used to extract the deep blue aqueous layer. The combined organic layers were washed with basic ammonium chloride solution (30 cm3) and brine (2  30 cm3), dried (Na2SO4) and concentrated under reduced pressure. The residue was recrystallised from methanol, and the mother liquor chromatographed [SiO2, Et2O-light petroleum (bp 40-60 °C), 1:3 to 1:1] to give the *imide* (6.20 g, 77%) as plates, mp. 148-150 °C (from MeOH), free (>99:1) of its diastereoisomer; *R*f[Et2O-light petroleum (bp 40-60 °C), 1:1] 0.35; []D20 +103.1 (*c*. 1.01 in CHCl3); **max(Nujol)/cm–1 1701 (C=O), 1634 (C=C), 1313 (SO2N), 1249 (SiMe), 1134 (SO2N) and 1112 (SiPh); **H(400 MHz; CDCl3) 7.51 (2 H, m, ArH), 7.37-7.32 (3 H, m, ArH), 4.68 (1 H, qn, *J* 1.4, C=C*H*AHB), 4.56 (1 H, br s, C=CHA*H*B), 3.81 (1 H, t, *J* 6.3, CHN), 3.46 (1 H, d, *J* 13.8, C*H*AHBSO2), 3.38 (1 H, d, *J* 13.8, CHA*H*BSO2), 3.16 (1 H, dd, *J* 16.1 and 12.2, C*H*AHBCO), 2.59 (1 H, dd, *J* 16.1 and 3.7, CHA*H*BCO), 2.41 (1 H, dd, *J* 12.2 and 3.7, CHSi), 2.01 (2 H, br d, *J* 6.3, C*H*2CHN), 1.92-1.79 (3 H, m), 1.58 (3 H, br s, C*Me*=CH2), 1.40-1.27 (2 H, m), 1.11 (3 H, s, C*Me*AMeB), 0.95 (3 H, s, CMeA*Me*B), 0.35 (3 H, s, Si*Me*AMeB) and 0.32 (3 H, s, SiMeA*Me*B); **C(100 MHz; CDCl3) 171.7+, 146.0+, 137.2+, 134.0–, 129.2–, 127.7–, 108.8+, 65.3–, 53.0+, 48.4+, 47.7+, 44.7–, 38.5+, 34.9+, 32.8+, 32.7–, 26.5+, 25.0–, 20.7–, 19.9–, –4.3– and –4.8–; *m*/*z* (EI) 445 (39%, M+), 430 (6, M – Me), 403 (7, M – CH2=CMeH), 381 (52, M – SO2), 366 (57, M – SO2 – Me), 352 (22, M – SO2CH2 – Me), 338 (32, M – Ph – 2Me), 312 (85, M – CH2=CMe – Me – Ph), 231 (48, M – NR2) and 135 (100, PhMe2Si)(Found: C, 65.0; H, 8.1; N, 3.0; M+, 445.2125. C24H35NO3SSi requires C, 64.7; H, 7.9; N, 3.1% *M*, 445.2107). The major product (67:33), when we carried out a similar conjugate addition of lithium bis(2-propenyl)cuprate (2.1 mmol) to the (*Z*)-isomer (430 mg, 1.1 mmol) of the enantiomeric sultam was rich in the diastereoisomer, 1S,5R,7R-N-{3R-[3-*dimethyl*(*phenyl*)*silyl*]-4-*methylenepentanoyl*}*tricyclo*[5.2.11,5]-4-*aza*-10,10-*dimethyl*-3-*thiadecane* S,S-*dioxide* (381 mg, 80%); *R*f[Et2O-light petroleum (bp 40-60 °C), 1:1] 0.33; **max(CH2Cl2)/cm–1 1696 (C=O), 1591 (Ar), 1328 (SO2N) and 1112 (SiPh); **H(250 MHz; CDCl3) 7.51 (2 H, m, ArH), 7.40-7.30 (3 H, m, ArH), 4.71 (1 H, br s, C=C*H*AHB), 4.53 (1 H, br s, C=CHA*H*B), 3.83 (1 H, t, *J* 6.2, CHN), 3.46 (1 H, d, *J* 13.8, C*H*AHBSO2), 3.37 (1 H, d, *J* 13.8, CHA*H*BSO2), 3.01 (1 H, dd, *J* 16.8 and 11.2, C*H*AHBCO), 2.80 (1 H, dd, *J* 16.8 and 4.1, CHA*H*BCO), 2.41 (1 H, dd, *J* 11.2 and 4.1, CHSi), 2.01 (2 H, br d, *J* 6.6, C*H*2CHN), 1.89-1.83 (3 H, m), 1.59 (3 H, br s, C*Me*=CH2), 1.38-1.26 (2 H, m), 1.11 (3 H, s, C*Me*AMeB), 0.94 (3 H, s, CMeA*Me*B), 0.35 (3 H, s, Si*Me*AMeB) and 0.33 (3 H, s, SiMeA*Me*B).

**Methyl (3*R*)-4-methyl-3-dimethyl(phenyl)silylpent-4-enoate 135**

The imide **134** (15.0 g, 33.7 mmol) in dry THF (200 cm3) was added by cannula at 0 C under nitrogen over 5 min to a mixture of methyl magnesium bromide (3 mol dm–3 solution in Et2O, 22.4 cm3, 67.2 mmol) and methanol (4.05 cm3, 99.9 mmol) in dry THF (200 cm3). The mixture was refluxed under nitrogen for 17 h, and allowed to cool to 40 C. Ammonium chloride solution (saturated, 100 cm3) was added, the layers were separated, and the aqueous layers extracted with ether (4  100 cm3). The combined organic layers were dried (Na2SO4) and concentrated under reduced pressure. The residue was chromatographed [SiO2, Et2O-light petroleum (bp 40-60 °C), 1:8 to 1:3] to give the *ester* (8.57 g, 97%); *R*f[Et2O-light petroleum (bp 40-60 °C), 1:1] 0.59; []D20 +81.2 (*c*. 1.14 in CHCl3); **max(film)/cm–1 1739 (C=O), 1635 (C=C), 1249 (SiMe) and 1113 (SiPh); **H(400 MHz; CDCl3) 7.51 (2 H, m, ArH), 7.38-7.32 (3 H, m, ArH), 4.74 (1 H, qn, *J* 1.4, C=C*H*AHB), 4.49 (1 H, br s, C=CHA*H*B), 3.58 (3 H, s, CO2Me), 2.52 (1 H, dd, *J* 16.0 and 12.0, C*H*AHBCO), 2.40 (1 H, dd, *J* 16.0 and 4.4, CHA*H*BCO), 2.24 (1 H, dd, *J* 12.0 and 4.4, CHSi), 1.63 (3 H, br s, C*Me*=CH2), 0.33 (3 H, s, Si*Me*AMeB) and 0.32 (3 H, s, SiMeA*Me*B); **C(100 MHz; CDCl3) 173.8+, 146.2+, 137.1+, 134.0+, 129.3, 127.8, 108.8+, 51.4, 34.6+, 32.9, 24.7, 4.0 and 5.1; *m*/*z* (ESI) 285 (100%, M+ Na)(Found: M+ Na, 285.1278. C15H22O2Si requires *M* + Na, 285.1287), and the recovered chiral auxiliary (6.80 g, 94%).

**Methyl (2*R*,3*R*)-2,4-dimethyl-3-[dimethyl(phenyl)silyl]pent-4-enoate 136**

The ester **135** (2.88 g, 11.0 mmol) in dry tetrahydrofuran (13 cm3) was added by cannula at 78 C under argon to LDA prepared from n-butyllithium (1.65 mol dm–3 solution in hexanes, 15.3 cm3, 25.3 mmol) and diisopropylamine (3.39 cm3, 24.2 mmol) in dry tetrahydrofuran (11 cm3), and the mixture stirred for 1 h. Methyl iodide (6.0 cm3, 96.4 mmol) was added, and the mixture was stirred for 1.25 h at 78 C. The mixture was warmed to 0 C over 2 h, and saturated ammonium chloride solution (saturated, 30 cm3) was added. The layers were separated, and the aqueous layers extracted with dichloromethane (3  50 cm3). The combined organic layers were dried (Na2SO4) and concentrated under reduced pressure. The residue was chromatographed [SiO2, Et2O-light petroleum (bp 40-60 °C), 1:5 to 1:3] to give the -*methylated* *ester* (2.18 g, 93%) as a mixture (97:3) of diastereoisomers; *R*f[Et2O-light petroleum (bp 40-60 °C), 1:1] 0.64; []D20 +65.6 (*c*. 1.73 in CHCl3); **max(film)/cm–1 1736 (C=O), 1634 (C=C), 1250 (SiMe) and 1112 (SiPh); **H(400 MHz; CDCl3) 7.51 (2 H, m, ArH), 7.38-7.32 (3 H, m, ArH), 4.81 (1 H, br s, C=C*H*AHB), 4.57 (1 H, br s, C=CHA*H*B), 3.25 (3 H, s, CO2Me), 2.68 (1 H, dq, *J* 11.6 and 6.8, C*H*MeCO), 2.03 (1 H, d, *J* 11.6, CH*Me*CO), 1.57 (3 H, br s, C*Me*=CH2), 1.11 (1 H, d, *J* 6.8, C*H*Si), 0.36 (3 H, s, Si*Me*AMeB) and 0.25 (3 H, s, SiMeA*Me*B); **C(63 MHz; CDCl3) 176.6+, 144.3+, 137.8+, 134.1–, 128.8–, 127.4–, 111.6+, 51.3–, 40.5–, 40.0–, 24.3–, 17.6–, –2.6– and –4.2–; *m*/*z* (EI) 276 (39%, M+), 261 (26, M – Me) and 135 (100, PhMe2Si)(Found: M+, 276.1538. C16H24O2Si requires *M*, 276.1546), and (6R)-(Z)-7*-methy*l-6-[*dimethyl*(*phenyl*)*silyl*]-2-(2-*propylamino*)*octa*-2,7-*dien*-4-*one*70 (65 mg, 2%); *R*f[Et2O-light petroleum (bp 40-60 °C), 1:1] 0.43; **max(film)/cm–1 3070 (NH), 1607 (C=O), 1580 (C=C), 1511 (C=C), 1248 (SiMe) and 1113 (SiPh); **H(400 MHz; CDCl3) 10.70 (1 H, br d, *J* 8.8, NH), 7.52 (2 H, m, ArH), 7.36-7.30 (3 H, m, ArH), 4.85 (1 H, s, COC*H*=CMe), 4.71(1 H, qn, *J* 1.5, C=C*H*AHB), 4.51 (1 H, br s, C=CHA*H*B), 3.67 (1 H, d sep, *J* 8.8 and 6.4, C*H*Me2), 2.46 (1 H, dd, *J* 16.5 and 13.0, C*H*AHBCO), 2.38-2.31 (2 H, m, CHA*H*BCO and CHSi), 1.90 (3 H, s, COCH=C*Me*), 1.60 (3 H, br s, C*Me*=CH2), 1.21 (3 H, d, *J* 6.4, CH*Me*AMeB), 1.19 (3 H, *J* 6.4, CHMeA*Me*B), 0.32 (3 H, s, Si*Me*AMeB) and 0.29 (3 H, s, SiMeA*Me*B); **C(100 MHz; CDCl3) 196.4+, 161.4+, 146.7+, 138.1+, 134.0, 128.9, 127.6, 108.4+, 94.7, 44.7, 40.8+, 33.0, 24.7, 23.9, 23.8, 18.8, 4.0 and 4.7; *m*/*z* (EI) 329 (80%, M+), 314 (47, M  Me), 286 (24, M  CHMe2), 194 (74, M  PhMe2Si), 135 (98, PhMe2Si) and 126 [100, M  CH2=CMeCH(SiMe2Ph)CH2](Found: M+, 329.2168. C20H31NOSi requires *M*, 329.2175).

**(2*R*,3*R*)-2,4-Dimethyl-3-dimethyl(phenyl)silylpent-4-en-1-ol**

The ester **136** (2.74 g, 9.91 mmol) was stirred with a suspension of lithium aluminium hydride (0.83 g, 21.8 mmol) in dry ether (85 cm3) under argon at room temperature for 1.75 h. Water (20 cm3) was added, the layers were separated, and the aqueous layer was extracted with ether (4  100 cm3). The combined organic layers were washed with brine (20 cm3), dried (Na2SO4), filtered through a short silica pad, and concentrated under reduced pressure to give the alcohol (2.15 g, 87%); *R*f[Et2O-light petroleum (bp 40-60 °C), 1:1] 0.34; []D20 +89.8 (*c*. 1.17 in CHCl3); **max(film)/cm–1 3358 (OH), 1634 (C=C), 1249 (SiMe) and 1111 (SiPh); **H(400 MHz; CDCl3) 7.55 (2 H, m, ArH), 7.38-7.33 (3 H, m, ArH), 4.81 (1 H, br s, C=C*H*AHB), 4.64 (1 H, br s, C=CHA*H*B), 3.48 (1 H, br d, *J* 10.6, C*H*AHBOH), 3.30 (1 H, dd, *J* 10.6 and 5.8, CHA*H*BOH), 1.93 (1 H, m, C*H*Me), 1.80 (1 H, d, *J* 9.9, CHSi), 1.68 (3 H, s, C*Me*=CH2), 0.96 (3 H, d, *J* 6.6, CH*Me*), 0.43 (3 H, s, Si*Me*AMeB) and 0.25 (3 H, s, SiMeA*Me*B); **C(63 MHz; CDCl3) 146.0+, 139.6+, 133.6–, 129.1–, 128.0–, 111.1+, 67.3+, 40.1–, 36.6–, 24.8–, 17.0–, –1.7– and –4.4–; *m*/*z* (ESI) 271 (100%, M+ + Na) and 248 (6%, M)(Found: M+ + Na, 271.1501. C15H24OSi requires *M* + Na, 271.1494). On a larger scale (7.81 g, 28.2 mmol), chromatography [SiO2, Et2O-light petroleum (bp 40-60 °C), 1:5 to 1:2] was necessary to obtain clean alcohol (5.68 g, 81%), which decomposed on standing. Further chromatography gave the alcohol (1.54 g, 27%), identical with the previous sample, and (3R,4R)-3-*dimethyl*(*phenyl*)*silyl*-2,2,4-*trimethyltetrahydrofuran* (3.03 g, 53%); *R*f[Et2O-light petroleum (bp 40-60 °C), 1:1] 0.52; **max(film)/cm–1 1250 (Si–Me) and 1109 (Si–Ph); **H(400 MHz; CDCl3) 7.60-7.54 (2 H, m, Ph), 7.40-7.35 (3 H, m, Ph), 3.80 (1 H, dd, *J* 8.2 and 5.6, C*H*AHBO), 3.54 (1 H, dd, *J* 8.2 and 2.0, CHA*H*BO), 2.44 (1 H, br sextet-d, *J* 6.9 and 2.0, C*H*Me), 1.57 (1 H, d, *J* 7.4, CHSi), 1.36 (3 H, s, C*Me*AMeB), 1.16 (3 H, d, *J* 7.2, CH*Me*), 1.06 (3 H, s, CMeA*Me*B), 0.470 (3 H, s, Si*Me*AMeB) and 0.466 (3 H, s, SiMeA*Me*B); **C(63 MHz; CDCl3) 138.9+, 133.6–, 128.9–, 127.8–, 83.2+, 73.8+, 43.5–, 38.5–, 31.0–, 29.1–, 19.2–, –1.0– and –1.1–; *m*/*z* (EI) 233 (38%, M+ – Me) and 135 (98, SiMe2Ph)(Found: M+ – Me, 233.1361. C15H24OSi requires *M* – Me, 233.1361).

**(2*R*,3*R*)-2,4-Dimethyl-3-[dimethyl(phenyl)silyl]pent-4-enyl toluene-*p*-sulfonate**

The alcohol (2.03 g, 8.16 mmol), pyridine (1.32 cm3, 16.3 mmol) and toluene-*p*-sulfonyl chloride (2.33 g, 12.2 mmol) were kept at room temperature in chloroform (filtered through silica, 10 cm3) for 21 h. The mixture was poured into distilled water (100 cm3), the layers separated, and the aqueous layer extracted with dichloromethane (4  50 cm3). The combined organic layers were dried, filtered and concentrated under reduced pressure, and the residue chromatographed [SiO2, Et2O-light petroleum (bp 40-60 °C), 1:5 to 1:2] to give the *tosylate* (2.66 g, 81%); *R*f[Et2O-light petroleum (bp 40-60 °C), 1:1] 0.56; []D20 +64.9 (*c*. 1.36 in CHCl3); **max(film)/cm–1 1634 (C=C), 1595 (Ph), 1250 (SiMe) and 1110 (SiPh); **H(250 MHz; CDCl3) 7.62 (2 H, d, *J* 7.9, ArH), 7.44 (2 H, m, ArH), 7.39-7.30 (3 H, m, ArH), 7.29 (2 H, d, *J* 7.9, ArH), 4.80 (1 H, br s, C=C*H*AHB), 4.57 (1 H, br s, C=CHA*H*B), 3.94 (1 H, dd, *J* 9.3 and 4.8, C*H*AHBOTs), 3.44 (1 H, t, *J* 9.3, CHA*H*BOTs), 2.45 (3 H, s, Ar*Me*), 2.10 (1 H, m, C*H*Me), 1.67 (1 H, d, *J* 9.4, CHSi) 1.60 (3 H, br s, C*Me*=CH2), 0.91 (3 H, d, *J* 6.5, CH*Me*), 0.34 (3 H, s, Si*Me*AMeB) and 0.22 (3 H, s, SiMeA*Me*B); **C(63 MHz; CDCl3) 147.0+, 144.6+, 141.6+, 138.6+, 133.7–, 133.0+, 130.3–, 129.8–, 129.0–, 127.9–, 127.8–, 127.0–, 111.9+, 65.8+, 39.8–, 34.1–, 25.0–, 21.8–, 21.6–, 16.7–, 15.3–, –2.0– and –4.3–; *m*/*z* (EI) 402 (18%, M+) and 135 (100, SiMe2Ph)(Found: M+, 402.1652. C22H30O3SSi requires *M*, 402.1685). The tosylate is unstable, and undergoes protodesilylation to give 2,4-*dimethylpent*-3-*enyl* *toluene*-p-*sulfonate*; *R*f[EtOAc-light petroleum (bp 40-60 °C), 1:9] 0.35; **H(200 MHz; CDCl3) 7.77 (2 H, d, *J* 8.2, ArH), 7.33 (2 H, d, *J* 8.2, ArH), 4.74 (1 H, dsep, *J* 9.0 and 1.3, C*H*=CMe2), 3.82 (1 H, dd, *J* 9.4 and 6.3, OC*H*AHB), 3.73 (1 H, dd, *J* 9.4 and 7.5, OCHA*H*B), 2.68 (1 H, m, C*H*Me), 2.44 (3 H, m, Ar*Me*), 1.63 (3 H, br s, CH=C*Me*AMeB), 1.55 (3 H, br s, CH=CMeA*Me*B) and 0.91 (3 H, d, *J* 6.7, CH*Me*); *m*/*z* (ESI) 291 (M+ + Na)(Found: M+ + Na, 291.1025. C14H20O3S requires *M* + Na, 291.1030).

**(3*R*,4*R*)-2,4-Dimethyl-3-[dimethyl(phenyl)silyl]hex-1-ene 137**

Methyllithium (1.9 mol dm–3 solution in Et2O, 19 cm3, 36 mmol) and copper(I) iodide118 (3.26 g, 17.1 mmol) were mixed in dry ether (50 cm3) at 15 C under argon (ice-salt bath), and cooled to 78 C. The tosylate (2.30 g, 5.71 mmol) in dry toluene (50 cm3) was added, the mixture stirred at 78 C for 1.5 h, and at room temperature for 2.5 h. Ammonium chloride solution (20 cm3) was added at 0 C, the layers were separated, and the organic layer washed with basic ammonium chloride solution (3  20 cm3) until it had cleared. The combined aqueous layers were then extracted with ether (3  50 cm3) and the combined organic layers were washed with brine (10 cm3), dried (Na2SO4) and concentrated. The residue was chromatographed (SiO2, Et2O-hexane, 1:10 to 1:5) to give the *allylsilane*(1.26 g, 90%); *R*f[Et2O-light petroleum (bp 40-60 °C), 1:1] 0.73; []D20 +72.3 (*c*. 1.07 in CHCl3); **max(film)/cm–11633 (C=C), 1250 (SiMe) and 1111 (SiPh); **H(400 MHz; CDCl3) 7.51 (2 H, m, ArH), 7.34-7.29 (3 H, m, ArH), 4.73 (1 H, br s, C=C*H*AHB), 4.57 (1 H, br s, C=CHA*H*B), 1.68 (1 H, m, CHSi), 1.62 (3 H, br s, C*Me*=CH2), 1.47 (1 H, m, C*H*MeEt), 1.02-0.83 (2 H, m, C*H*2Me), 0.86 (3 H, d, *J* 6.0, CH*Me*Et), 0.74 (3 H, t, *J* 7.3, CH2*Me*), 0.38 (3 H, s, Si*Me*AMeB) and 0.26 (3 H, s, SiMeA*Me*B); **C(63 MHz; CDCl3) 146.9+, 140.1+, 133.9–, 128.6–, 127.6–, 110.6+, 44.2–, 35.5–, 29.6+, 24.8–, 18.7–, 11.6–, –1.5– and –3.3–; *m*/*z* (EI) 246 (38%, M+), 231 (18, M+ – Me), 217 (21, M+ – Et), 189 (10, M+ – CHMeEt) and 135 (100, SiMe2Ph)(Found: M+, 246.1818. C16H26Si requires *M*, 246.1804).

**(2*R*,3*R*,4*R*)-2,4-Dimethyl-3-dimethyl(phenyl)silylhexanol 138**

**Method A.** 9-BBNH (0.5 mol dm–3 solution in THF, 18.7 cm3, 9.35 mmol) and the allylsilane **137** (1.15 g, 4.67 mmol) were kept at room temperature for 24 h. Water (9 cm3), sodium hydroxide solution (10%, 9 cm3) and hydrogen peroxide (30% solution in H2O, 9 cm3) were added, the mixture was stirred rapidly at room temperature for 24 h, and at 50 C for 1 h. The mixture was cooled, extracted with ether (4  50 cm3), and the combined organic layers dried (Na2SO4) and concentrated under reduced pressure. The residue was chromatographed [SiO2, Et2O-light petroleum (bp 40-60 °C), 1:7 to 1:2] to give the *alcohol* (0.85 g, 69%) as a mixture (99:1) of diastereoisomers (measured by integration of the C*H*2OH peaks in the 1H NMR spectrum); *R*f[Et2O-light petroleum (bp 40-60 °C), 1:1] 0.37; []D20 22.4 (*c*. 1.16 in CHCl3); **max(film)/cm–13316 (OH), 1249 (Si–Me) and 1110 (Si–Ph); **H(400 MHz; CDCl3) 7.55 (2 H, m, ArH), 7.37-7.32 (3 H, m, ArH), 3.30 (1 H, dd, *J* 10.3 and 7.1, C*H*AHBOH), 3.25 (1 H, dd, *J* 10.3 and 7.9, CHA*H*BOH), 1.94 (1 H, sextet-d, *J* 7.4 and 2.0, C*H*MeCH2OH), 1.71 (1 H, sextet-d, *J* 6.9 and 2.0, C*H*MeEt), 1.40 (1 H, br s, OH), 1.37-1.23 (2 H, m, C*H*2Me), 1.20 (1 H, t, *J* 2.0, CHSi), 1.05 (3 H, d, *J* 7.0, CH*Me*CH2OH), 0.93 (3 H, d, *J* 7.4, CH*Me*Et), 0.81 (3 H, t, *J* 7.4, CH2*Me*), 0.43 (3 H, s, Si*Me*AMeB) and 0.39 (3 H, s, SiMeA*Me*B); **C(100 MHz; CDCl3) 140.6+, 133.9, 128.7, 127.7, 68.8+ (*C*H2OH), 35.2, 34.6, 32.8, 29.9+ (*C*H2Me), 18.6, 18.2, 12.5 (CH2*Me*), 0.4 (Si*Me*AMeB) and 0.8 (SiMeA*Me*B); *m*/*z* (EI) 287 (100%, M+ + Na)(Found: M+ + Na, 287.1803. C16H28OSi requires *M* + Na, 287.1807).

**Method B.** The *syn* ester **130** (30 mg, 0.103 mmol) and lithium aluminium hydride (7.8 mg, 0.205 mmol) were stirred in ether (4 cm3) under argon at room temperature for 1 h. Water (2 cm3) was added and the mixture extracted into ether (4  20 cm3). The extracts were dried (Na2SO4) and evaporated under reduced pressure. Chromatography (SiO2, EtOAc-hexane, 1:4) gave the alcohol (26.1 mg, 96%); *R*f(EtOAc-hexane, 1:4) 0.26; []D –19.6 (*c*. 1.03 in CHCl3); **max(CCl4)/cm–1 3650 and 3500 (OH), 1250 (SiMe2), 1110 (SiPh), 1030 (CO) and 700 (Ph), identical (1H NMR, 13C NMR) with the sample described above.

**(2*R*,3*R*,4*R*)-2,4-Dimethyl-3-dimethyl(phenyl)silylhexanal**

Dry DMSO (0.015 cm3, 0.208 mmol) in dichloromethane (0.1 cm3) was added to oxalyl chloride (0.009 cm3, 0.104 mmol) in dichloromethane (1 cm3) under argon at –78 °C and stirred for 5 min. The alcohol **138** (from Method B, 25 mg, 0.0947 mmol) in dichloromethane (1 cm3) was added dropwise. After 30 min, distilled triethylamine (0.2 cm3) was added, the mixture was kept at –78 °C for 10 min then allowed to warm to room temperature. Water (2 cm3) was added and the mixture stirred for 10 min, then extracted with dichloromethane (3  25 cm3). The organic extracts were washed with hydrochloric acid solution (3 mol dm–3, 2  10 cm3) and sodium bicarbonate solution (2  15 cm3), dried (Na2SO4) and concentrated under reduced pressure. Chromatography of the residue (SiO2, EtOAc-hexane, 1:19) gave the *aldehyde* (21.2 mg, 85%), *R*f(EtOAc-hexane, 1:19) 0.28; []D +4.5° (*c*. 1.01 in CHCl3); **max(CCl4)/cm–1 2720 (aldehyde CH), 1725 (C=O), 1250 (SiMe2), 1110 (SiPh) and 700 (Ph); **H(400 MHz; CDCl3) 9.55 (1 H, d, *J*1.1, CHO), 7.51 (2 H, m, ArH), 7.36-7.32 (3 H, m, ArH), 2.52 (1 H, qdd, *J* 7.2, 3.5 and 1.1, C*H*MeCHO), 1.69 (1 H, m under CHSi, EtMeC*H*), 1.68 (1 H, br d, *J* 3.6, CHSi), 1.30 (1 H, dqd, *J* 14.9, 7.4 and 5.6, MeC*H*AHB), 1.21 (1 H, m under CH*Me*CHO, MeCHA*H*B), 1.17 (3 H, d, *J* 7.2, CH*Me*CHO), 0.90 (3 H, d, *J* 6.8, Et*Me*CH), 0.77 (3 H, t, *J* 7.3, CH2*Me*), 0.37 (3 H, s, Si*Me*AMeB) and 0.31 (3 H, s, SiMeA*Me*B); **C(100 MHz; CDCl3) 205.6, 139.3, 133.8, 128.9, 127.8, 45.6, 34.9, 31.7, 29.9, 18.6, 14.4, 12.1, –0.9 and –1.4; *m*/*z* (EI) 262 (0.1%, M+), 185 (6, M – Ph) and 135 (72, PhMe2Si)(Found: M+, 262.1743. C16H26OSi requires *M*, 262.1753). This was potentially a fragment **C** with the silyl group on C-11 in place of the oxygen function, but it was never used, because of the reactions in Scheme 3.

**(2*R*,3*R*,4*R*)-3-Triisopropylsilyloxy-2,4-dimethylhexanal 139 (Fragment C)**

The following sequence has already been described in full for the racemic compounds.71 The data here augment those in the earlier publication. The alcohol **138** (from Method A, 0.73 g, 2.77 mmol) and trimethylacetyl chloride (0.41 cm3, 3.32 mmol) gave the pivalate (0.92 g, 95%); []D20 12.9 (*c*. 1.35 in CHCl3)(Found: M+ + Na, 371.2370. C21H36O2Si requires *M* + Na, 371.2382).

The pivalate (0.92 g, 2.63 mmol), potassium bromide (0.42 g, 3.53 mmol), peracetic acid (30% solution in AcOH, 7.4 cm3) and anhydrous sodium acetate (0.74 g) in glacial acetic acid (7.5 cm3) gave the alcohol (388 mg, 64%); []D20 +4.8 (*c*. 1.26 in CHCl3); **C(100 MHz; CDCl3) 179.0+ (CO2), 74.6 (CHOH), 67.3+ (CH2O), 38.8+ (*C*Me3), 37.1, 34.7, 27.2 (C*Me*3), 25.1+ (*C*H2Me), 15.0, 10.8 and 9.2 (CH2*Me*). A repeat of this experiment on a larger scale (3.47 g, 9.95 mmol) but with unfortunate overheating gave the same alcohol (0.91 g, 40%) and (2R,4R)-2,4-*dimethyl*-3-*oxohexyl* *pivalate*(0.48 g, 21%); *R*f[Et2O-light petroleum (bp 40-60 °C), 1:1] 0.60; **max(film)/cm–1 1735 (ester C=O) and 1702 (ketone C=O); **H(250 MHz; CDCl3) 4.18 (1 H, dd, *J* 10.8 and 8.1, C*H*AHBO), 4.02 (1 H, dd, *J* 10.8 and 5.4, CHA*H*BO), 2.99 (1 H, dqd, *J* 8.1, 7.1 and 5.4, C*H*MeCH2O), 2.55 (1 H, br sextet, *J* 6.8, C*H*MeEt), 1.68 (1 H, br d qn, *J* 14.3 and 7.2, C*H*AHBMe), 1.33 (1 H, br d qn, *J* 14.3 and 7.2, C*H*AHBMe), 1.12 (9 H, s, tBu), 1.04 (3 H, d, *J* 7.1, CH*Me*), 1.03 (3 H, d, *J* 7.1, CH*Me*) and 0.83 (3 H, t, *J* 7.4, CH2*Me*); **C(63 MHz; CDCl3) 214.9+, 178.2+, 65.6+, 47.2–, 43.9–, 29.4+, 27.1–, 25.4+, 15.8–, 13.4– and 11.8–; *m*/*z* (TOF) 251 (M+ + Na)(Found: M+ + Na, 251.1618. C13H24O3 requires *M* + Na, 251.1623).

The alcohol (0.91 g, 3.95 mmol), 2,6-lutidine (1.36 cm3, 1.76 mmol) and TIPS triflate (1.26 cm3, 4.69 mmol) in dry dichloromethane (15 cm3) under argon at room temperature for 6 h (the earlier preparation was reported to have been carried out in 30 min, but this is too short a time) gave the *silyl ether* (1.49 g, 97%); []D20 14.5 (*c*. 2.28 in CHCl3); **C(100 MHz; CDCl3) 178.5+ (CO2), 75.2– (CHOSi), 67.9+ (CH2O), 41.5– (*C*HMeEt), 38.8+ (*C*Me3), 34.7– (*C*HMeCH2O), 27.2– (C*Me*3), 26.5+ (*C*H2Me), 18.35 (SiCH*Me*AMeB), 18.30– (SiCHMeA*Me*B), 14.2, 13.2 (Si*C*HMe2), 12.4 and 12.0; *m*/*z* (ESI) 409 (1.8%, M+ + Na)(Found: M+ + Na, 409.3116. C22H46O3Si requires *M* + Na, 409.3114).

The TIPS ether (1.34 g, 3.46 mmol) and lithium aluminium hydride (0.74 g, 19.5 mmol) gave the *alcohol* (0.71 g, 68%); []D20 11.7 (*c*. 1.36 in CHCl3); **C(100 MHz; CDCl3) 76.9– (CHOSi), 67.0+ (CH2OH), 40.6–, 38.4–, 26.3+ (*C*H2Me), 18.33 (SiCH*Me*AMeB), 18.29– (SiCHMeA*Me*B), 18.0, 15.7, 13.1 (Si*C*HMe2) and 12.4; *m*/*z* (ESI) 325 (64%, M+ + Na), 303 (100%, MH+)(Found: M+ + Na, 325.2533. C17H38O2Si requires *M* + Na, 325.2539).

The alcohol (1.80 g, 5.95 mmol), dimethyl sulfoxide (2.11 cm3, 29.8 mmol), oxalyl chloride (1.30 cm3, 14.9 mmol) and triethylamine (6.22 cm3, 44.6 mmol) in dry dichloromethane (175 cm3) gave the aldehyde (1.66 g, 93%); []D20 +19.4 (*c*. 0.52 in CHCl3). The earlier preparation used TPAP, but Swern appears to be better.

**(4*R*,5*S*)-4-Methyl-3-[2(*R*)-methyl-1-oxobutyl]-5-phenyloxazolidin-2-one 141**

Sodium bis(trimethylsilyl)amide (1.0 mol dm–3 solution in THF, 12.4 cm3, 12.4 mmol), the oxazolidinone **140**119 (2.8 g, 11.3 mmol) and methyl iodide (3.53 cm3, 56.6 mmol) gave the oxazolidinone (2.171 g, 74%) as cubes, mp 63-64 °C (hexane); lit.,120 65-66 °C; *R*f(EtOAc-hexane, 2:1) 0.67; **max(CH2Cl2)/cm–1 1780 (C=O in ring) and 1700 (amide C=O); **H(250 MHz; CDCl3) 7.50 (3 H, m, Ph), 7.20 (2 H, m, Ph), 5.65 (1 H, d, *J* 7.4, C*H*Ph), 4.80 (1 H, qn, *J* 6.6, NC*H*Me), 3.65 (1 H, sextet, *J* 6.8, C*H*MeEt), 1.75 (1 H, dqn, *J* 13.6 and 7.3, CHMeC*H*AHBMe), 1.47 (1 H, dqn, *J* 14.4 and 7.4, CHMeCHA*H*BMe), 1.16 (3 H, d, *J* 6.8, CH*Me*Et), 0.95 (3 H, t, *J* 7.4, CHMeCH2*Me*) and 0.86 (3 H, d, *J* 6.6, CH*Me*).

**(*R*)-2-Methylbutanoic acid**

The oxazolidinone **141** (12 g, 0.046 mol), hydrogen peroxide (30% solution in water, 28.4 cm3, 0.276 mol) and lithium hydroxide (2.21 g, 0.094 mol) gave the acid (3.6 g, 77%); *R*f(hexane-EtOAc, 1:1) 0.6; [D –13.33 (*c* 1.8 in CHCl3), lit.,121 –15.95 (*c*. neat); **max(film)/cm–1 3300-2200 (OH) and 1700 (C=O); **H(250 MHz; CDCl3) 11.0 (1 H, br s, OH), 2.39 (1 H, sextet, *J* 7.0, C*H*Me), 1.70 (1 H, dqn, *J* 14.7 and 7.4, CHMeC*H*AHBMe), 1.51 (1 H, dqn, *J* 14.2 and 7.3, CHMeCHA*H*BMe), 1.17 (3 H, d, *J* 7.0, CH*Me*) and 0.93 (3 H, t, *J* 7.4, CHMeCH2C*H*3).

**(*R*)-*N*-Methoxy-*N*-methyl-2-methylbutanamide**

(2*R*)-Methylbutanoic acid (2.3 g, 22.5 mmol) and carbonyldiimidazole (4.01 g, 24.8 mmol) in dry dichloromethane (90 cm3) were stirred at room temperature under argon for 3 h. *N*,*O*-Dimethylhydroxylamine hydrochloride (2.63 g, 27.0 mmol) and *N*-methylpiperidine (3.28 cm3, 27.0 mmol) in dichloromethane (8 cm3) were added and the mixture stirred for 3 days, monitoring by TLC, *R*f(hexane-EtOAc, 1:1) 0.18. The mixture was washed with hydrochloric acid (3 mol dm**–**3, 2  50 cm3), saturated sodium hydrogen carbonate solution (2  50 cm3) and brine, dried (MgSO4) and concentrated under reduced pressure to give the *amide* (3.0 g, 92%); *R*f(hexane-EtOAc, 1:1) 0.4; []D –26.25 (*c*. 1.6, CHCl3); **max(film)/cm–1 1620 (CO); **H(250 MHz; CDCl3) 3.66 (3 H, s, MeO), 3.17 (3 H, s, MeN), 2.77 (1 H, br q, *J* 6.8, C*H*Me), 1.70 (1 H, dqn, *J* 13.4 and 7.5, CHMeC*H*AHBMe), 1.38 (1 H, dqn, *J* 13.8 and 7.3, CHMeCHA*H*BMe), 1.08 (3 H, d, *J* 6.8, CH*Me*) and 0.86 (3 H, t, *J* 7.4, CHMeCH2*Me*); **C(100 MHz; CDCl3) 178.1, 61.5, 36.7, 32.2, 26.8, 17.2 and 12.0; *m*/*z* (EI) 145 (31%, M+), 85 (60, M – MeONMe) and 57 (100, CHMeEt)(Found: M+ 145.1105. C7H15NO2 requires *M*, 145.1102).

**(*R*)-2-Methylbutanal**

The Weinreb amide (4.2 g, 28.9 mmol) and lithium aluminium hydride (1.4 g, 37 mmol) were stirred in dry ether (165 cm3) at –45 °C for 1.3 h and at room temperature for 0.5 h. Potassium hydrogen sulfate (8.2 g in 23 cm3) was added at –45 °C and the mixture was stirred for 1 h at room temperature. The layers were separated and the aqueous layer washed with ether. The combined organic fractions were washed with cold hydrochloric acid (1 mol dm–3, 2  50 cm3), saturated sodium hydrogen carbonate solution (2  50 cm3) and brine, dried (MgSO4) and the ether was removed by distillation. The residue was distilled to give the aldehyde122 (1.31 g, 53%); *R*f(hexane-EtOAc, 8:1) 0.29; [D –26.06 (*c*. 2.3 in CHCl3); **max(film)/cm–1 1708 (CO); **H(250 MHz; CDCl3) 9.57 (1 H, d, *J* 1.9, CHO), 2.23 (1 H, sextet-d, *J* 7.0 and 1.9, C*H*Me), 1.64 (1 H, dqn, *J* 14.9 and 7.5, C*H*AHBMe), 1.42 (1 H, dqn, *J* 14.5 and 7.3, CHA*H*BMe), 1.05 (3 H, d, *J* 7.0, CH*Me*) and 0.90 (3 H, t, *J* 7.4, CHAHB*Me*).

**3-[(2*S*,3*R*,4*R*)-3-Hydroxy-2,4-dimethyl-1-oxohexyl]-4(*S*)-methylethyloxazolidin-2-one 143**

Following Evans,123 (*R*)-2-methylbutanal (freshly distilled, 0.6 g, contaminated with up to 50% by weight with ether) was added at –78 °C to a mixture of dibutylboron triflate (1 mol dm–3 solution in CH2Cl2, 25.6 cm3, 27.9 mmol), diisopropylethylamine (4.87 cm3, 27.9 mmol) and the oxazolidinone **142** (4.30g, 23.3 mmol) in dichloromethane (150 cm3), which had been kept at –78 °C for 1 h. The mixture was stirred at –78 °C for 0.75 h and at room temperature for 1.5 h. Phosphate buffer (120 cm3) was added and the mixture extracted with ether (2  300 cm3). The ether was evaporated off, the residue dissolved in methanol (4 cm3) and stirred with hydrogen peroxide (30% solution in water, 1 cm3) at 0 °C for 1 h. The mixture was diluted with water and the methanol removed under reduced pressure. The residue was extracted with ether (3  200 cm3) and the combined organic fractions were washed with sodium hydrogen carbonate solution (2  100 cm3) and brine, dried (MgSO4) and concentrated under reduced pressure. The residue was chromatographed [SiO2, light petroleum (bp 40-60 °C)-EtOAc, 2:1] to give the *alcohol* (0.88 g, 14%)as needles, mp 97-99 °C (from Et2O-hexane 2:1); *R*f(hexane-EtOAc, 2:1) 0.15; []D +60.7 (*c*. 1.2 in CHCl3); **max(CH2Cl2)/cm–1 3600-3300 (OH), 1781 (CO ring) and 1684 (CO sidechain); **H(250 MHz; CDCl3) 4.47 (1 H, dt, *J* 7.9 and 3.7, CHN), 4.28 (1 H, t, *J* 9.1, C*H*AHBO), 4.20 (1 H, dd, *J* 9.1 and 3.7, CHA*H*BO), 3.98 (1 H, qd, *J* 7.1 and 2.0, COC*H*Me), 3.59 (1 H, dt, *J* 9.0 and 2.0, C*H*OH), 2.34 (1 H, sep-d, *J* 7.0 and 3.9, C*H*MeAMeB), 1.82 (1 H, sextet-d, *J* 7.6 and 3.1, C*H*MeEt), 1.49 (1 H, sextet-d, *J* 7.6 and 3.1, C*H*AHBMe), 1.21 (3 H, d, *J* 7.1, CH*Me*), 1.14 (1 H, m, CHA*H*BMe) and 0.92-0.82 (12 H, m); **C(100 MHz; CDCl3) 178.5, 154.5, 74.5, 63.3, 58.2, 39.3, 36.7, 28.3, 25.2, 17.9, 14.7, 10.8 and 10.0; *m*/*z* (EI) 272 (68%, MH+), 254 (82, M – OH), 214 (51, M – CHMeEt) and 185 (83, M – CHOHCHMeEt)(Found: C, 61.9; H, 9.5; N, 5.0; M+ + H, 272.1863. C14H25NO4 requires C, 61.9; H, 9.3; N, 5.1% *M* + H, 272.1862).

**(2*S*,3*R*,4*R*)-3-Hydroxy-*N*-methoxy-*N*,2,4-trimethylhexanamide 144**

Trimethylaluminium (1.65 cm3 of a 2 mol dm–3 solution in hexanes, 3.3 mmol) was added to *N*,*O*-dimethylhydroxylamine hydrochloride (0.324 g, 3.3 mmol) in THF (6 cm3) at 0 °C. The mixture was stirred at 0 °C until a solution was formed, and then at room temperature for 30 min. The aldol adduct (0.3 g, 1.1 mmol) in THF (6 cm3 plus washings) was added slowly at –15 °C and the solution stirred between –15 and –5 °C for 1 h, then at 0 °C for 2 h. The mixture was injected into a mixture of dichloromethane (30 cm3) and hydrochloric acid solution (0.5 mol dm–3, 60 cm3) and stirred at 0 °C for 1 h. The layers were separated and the aqueous layer washed with dichloromethane (4  15 cm3). The combined organic fractions were washed with brine ( 2), dried (MgSO4) and concentrated under reduced pressure. Chromatography of the residue [SiO2, Et2O-light petroleum (bp 40-60 °C), 2:1] gave the *amide* (170 mg, 76%); *R*f[Et2O-light petroleum (bp 40-60 °C), 2:1] 0.32; []D +20.5 (*c*. 1.48 in CHCl3); **max(film)/cm–1 3450 (OH) and 1637 (C=O); **H(250 MHz; CDCl3) 4.00 (1 H, s, OH), 3.68 (3 H, s, OMe), 3.51 (1 H, br d, *J* 9.1, C*H*OH), 3.26 (3 H, s, NMe), 3.07 (1 H, br q, *J* 6.2, COC*H*Me, 1.79 (1 H, dqd, *J* 15.3, 7.5 and 3.1, C*H*AHBMe), 1.49 (1 H, dqd, *J* 15.8, 6.8 and 3.1, CHA*H*BMe), 1.15 (1 H, m, *J* 7.4, C*H*MeEt), 1.12 (3 H, d, *J* 7.1, COCH*Me*), 0.88 (3 H, t, *J* 7.5, CHAHB*Me*) and 0.81 (3 H, d, *J* 6.8, CH*Me*Et); **C(100 MHz; CDCl3) 178.8, 75.0, 61.5, 36.5, 35.5, 31.9, 25.1, 14.8, 10.8 and 9.6; *m*/*z* (EI) 203 (8%, M+), 185 (24, M – OH2), 146 (27, M – CHMeEt), 97 (40, MeC=CHCHMeEt), 87 (32, CHOHCHMeEt), 61 (100, MeONMeH) and 57 (50, CHMeEt)(Found: M+, 203.1519. C10H21NO3 requires *M*, 203.1521).

**(2*S*,3*R*,4*R*)-3-(*tert*-Butyldimethylsilyl)oxy-*N*-methoxy-*N*,2,4-trimethylhexanamide**

2,6-Lutidine (0.172 cm3, 1.5 mmol), TBS triflate (0.27 cm3, 1.18 mmol) and the amide **144** (120 mg, 0.59 mmol) were stirred in dry dichloromethane (12 cm3) under an argon at –78 °C for 1 h, and then kept at room temperature for 3 days. Ammonium chloride solution (8 cm3) was added and the aqueous layer was extracted with dichloromethane (3 10 cm3). The combined organic fractions were washed with buffer (pH 7, 2 10 cm3), dried (MgSO4) and concentrated. Chromatography of the residue [SiO2, light petroleum (bp 40-60 °C)-Et2O, 1:2] gave the *silyl ether* (180 mg, 96%); *R*f[light petroleum (bp 40-60 °C)-Et2O, 1:2] 0.5; []D +2.6 (*c*. 1.63 in CHCl3); **max(film)/cm–1 1667 (CO) and 1052 (OSi); **H(400 MHz; CDCl3) 3.84 (1 H, dd, *J* 8.2 and 2.6, CHOSi), 3.67 (3 H, s, OMe), 3.13 (3 H, s, NMe), 3.05 (1 H, m, COC*H*Me), 1.46-1.33 (2 H, m, C*H*2Me), 1.10 (3 H, d, *J* 6.9, COCH*Me*), 1.97 (1 H, m, C*H*MeEt), 0.89 (3 H, d, *J* 7.0, CH*Me*Et), 0.87 (9 H, s, SiMe2t*Bu*), 0.81 (3 H, t, *J* 7.8, CH2*Me*) and 0.04 (6 H, s, Si*Me*2tBu); **C(100 MHz; CDCl3) 177.4, 77.3, 61.4, 40.9, 38.0, 32.3, 26.1, 24.3, 18.4, 15.7, 15.6, 12.5 and 3.9; *m*/*z* (EI) 317 (2%, M+), 302 (71, M – Me), 286 (59, M – OMe), 260 (100, M – tBu), 115 (15, SiMe2tBu), 89 (43, MeOMeNCHO), 73 (72, MeON=C=O) and 57 (21, CHMeEt)(Found: M+, 317.2373. C16H35NO3Si requires *M*, 317.2386). The DIBAL reduction of this Weinreb amide to give the aldehyde **132** was described above as Method B.

**(2*S*,3*R*,4*R*)-3-Triisopropylsilyloxy-*N*-methoxy-*N*,2,4-trimethylhexanamide**

2,6-Lutidine (0.179 cm3, 1.55 mmol), TIPS triflate (0.329 cm3, 1.24 mmol) and the amide **144** (125 mg, 0.62 mmol) were stirred in dry dichloromethane (12 cm3) under argon at –78 °C for 15 min and then for 4 days at room temperature. Ammonium chloride solution (8 cm3) was added and the mixture worked up in the same way as for the TBS ether to give the *silyl ether* (170 mg, 76%); *R*f[light petroleum (bp 40-60 °C)-Et2O, 2:1] 0.3; []D –6.2 (*c*. 1.0 in CHCl3); **max(film)/cm–1 1655 (CO); **H(400 MHz; CDCl3) 4.14 (1 H, dd, *J* 7.9 and 3.1 , CHOSi), 3.67 (3 H, s, OMe), 3.12 (3 H, s, NMe), 3.04 (1 H, m, COC*H*Me), 1.55 (1 H, m, C*H*AHBMe), 1.32 (1 H, m, CHA*H*BMe), 1.17 (3 H, d, *J* 6.9, COCH*Me*), 1.07 [18 H, s, Si(CH*Me*2)3], 1.02 [3 H, s, Si(C*H*Me2)3], 0.94 (1 H, m, C*H*MeEt), 0.90 (3 H, d, *J* 7.5, CH*Me*Et) and 0.85 (3 H, t, *J* 7.1, CHAHB*Me*); C(100 MHz; CDCl3) 177.5, 76.9, 61.3, 42.1, 37.2, 32.4, 25.4, 18.4, 15.7, 14.2, 13.3 and 12.7; *m*/*z* (EI) 344 (18%, M+ – Me), 328 (51, M – OMe), 316 (100, M – iPr), 302 (10, M – CHMeEt), 157 (17, SiiPr3), 103 (6, iPrMeSi=OH) and 75 (17, Me2Si=OH)(Found: M+ – Me, 344.2617. C18H38NO3Si requires *M* – Me 344.2620).

**(2*S*,3*R*,4*R*)-3-Triisopropylsilyloxy-2,4-dimethylhexanal 139**

DIBAL (1 mol dm–3 solution in hexanes, 7.24 cm3, 7.24 mmol) and the amide (2 g, 5.57 mmol) were kept in dry THF (60 cm3) under argon at –78 °C for 1 h. Methanol (5 cm3) was added and the solution was allowed to warm to room temperature. Potassium sodium tartrate solution (10 cm3) was added and the mixture was stirred until the aluminium residues had dissolved. The layers were separated and the aqueous layer was extracted with ether (3  50 cm3). The combined organic fractions were washed with hydrochloric acid solution (0.5 mol dm–3, 30 cm3) and brine, dried (MgSO4) and concentrated. Chromatography of the residue [SiO2, light petroleum (bp 40-60 °C)-EtOAc, 10:1] gave the *aldehyde* (0.70 g, 49%); *R*f[light petroleum (bp 40-60 °C)-EtOAc, 9:1] 0.50; []D +19.9 (*c*. 1.3 in CDCl3); **max(film)/cm–1 2709 (CHO), 1726 (CO), 1247 (SiC), 1104 (SiO) and 882 (SiC); **H(400 MHz; CDCl3) 9.79 (1 H, d, *J* 0.5, CHO), 4.25 (1 H, t, *J* 3.9, CHOSi), 2.46 (1 H, qd, *J* 7.0 and 3.6, COC*H*Me), 1.65 (1 H, m, C*H*MeEt), 1.37 (1 H, m, C*H*AHBMe), 1.13 (3 H, d, *J* 7.0, COCH*Me*), 1.10 (1 H, m, CHA*H*BMe hidden under COCH*Me*), 1.05 (21 H, s, SiiPr3), 0.92 (3 H, d, *J* 6.9, CH*Me*Et) and 0.90 (3 H, t, *J* 7.4, CH2*Me*); **C(100 MHz; CDCl3) 205.4, 75.0, 49.7, 41.0, 26.0, 18.3, 15.0, 12.9, 12.2 and 9.3; *m*/*z* (EI) 301 (2.6%, M+ + H), 273 (33, M – C2H3), 257 (100, M – iPr), 243 (37, M – CHMeEt), 215 (18, M – CHMeEt – CO), 171 (52, M – CHMeEt – CHO – iPr), 157 (8, SiiPr3), 143 (26, M – SiiPr3), 131 (8, iPr2Si=OH) and 75 (8, Me2Si=OH)(Found: M+ + H, 301.2567. C17H37SiO2 requires *M* + H, 301.2562), identical (TLC, 1H NMR and 13C NMR) with the material prepared according to Scheme 27, and already reported,71 and recovered starting amide (0.83 g, 41%).

**(4*R*,5*S*,6*R*,7*R*,8*R*)-7-(*tert*-Butyldimethylsilyloxy)-4,6,8-trimethyldec-2-yn-5-ol 147**

Titanium tetrachloride (1 mol dm–3 solution in CH2Cl2, 0.38 cm3, 0.38 mmol) was added to the aldehyde **132** (88 mg, 0.34 mmol) in dry dichloromethane (0.5 cm3) at –78 °C under argon. After 5 min, the (*S*)-allenylsilane18 **3** (as a 50 wt% solution in pentane by 1H NMR, 0.29 g, 1.02 mmol) in dichloromethane (0.2 cm3) was added slowly. The mixture was stirred for 1.75 h at this temperature, then allowed to warm to room temperature, poured into sodium hydrogen carbonate solution (5 cm3). The layers were separated, and the aqueous layer extracted with dichloromethane (3  10 cm3). The combined organic fractions were washed with sodium hydrogen carbonate solution (5 cm3), dried (MgSO4), filtered through Celite and the filtrate concentrated to give a mixture of alcohols (75:25). Chromatography [SiO2, light petroleum (bp 40-60 °C)-EtOAc, 15:1] gave in succession the minor isomer, (4R,5R,6R,7R,8R)-7-(tert-*butyldimethylsilyloxy*)-4,6,8-*trimethyldec*-2-*yn*-5-*ol* **149** (33 mg); *R*f[light petroleum (bp 40-60 °C)-EtOAc, 15:1] 0.42; **max(film)/cm–1 3500 (OH), 1252 (SiC), 1055 (SiO) and 834 (SiC); **H(400 MHz; CDCl3) 3.80 (1 H, dd, *J* 5.9 and 1.7, CHOSi), 3.28 (1 H, ddd, *J* 9.3, 6.8 and 1.8, C*H*OH), 2.60 (1 H, qqn, *J* 7.0 and 2.3, MeCCCMe*H*), 1.91 (1 H, m, CHOHC*H*MeCHOSi), 1.80 (3 H, d, *J* 2.3, *Me*CC), 1.64 (1 H, m, EtMeC*H*), 1.23 (1 H, m, MeC*H*AHB under MeCCC*Me*H), 1.23 (3 H, d, *J* 7.1, MeCCC*Me*H), 1.14-0.99 (2 H, m, OH and MeCHA*H*B), 0.91-0.87 (6 H, CH2*Me* and CHOHCH*Me*CHOSi, under SitBu), 0.89 (9 H, s, SitBu), 0.81 (3 H, d, *J* 7.0, Et*Me*CH), 0.09 (3 H, s, Si*Me*AMeB) and 0.06 (3 H, s, SiMeA*Me*B); **C(100 MHz; CDCl3) recognisable signals at 79.0, 76.0, 41.2, 38.9, 30.3, 26.1, 25.7, 18.6, 16.5, 12.4, 11.9, 3.6, –4.1 and –4.4; *m*/*z* (EI) 269 (29.7%, M+ – C4H9), 201 (100, M – MeCCCHMeCHOHCHMe), 115 (20, tBuMe2Si), 75 (75, Me2Si=OH) and 67 (25, MeCCCHMe)(Found: M+ – C4H9, 269.1943. C19H38O2Si requires *M* – C4H9, 269.1937), a mixture of both isomers **147** and **149** (17 mg), and the major isomer **147** (33 mg), (total 80 mg, 75%); *R*f[light petroleum (bp 40-60 °C)-EtOAc, 15:1] 0.35; **max(film)/cm–1 3529 (OH), 1254 (SiC), 1096 (SiO) and 836 (SiC); **H(400 MHz; CDCl3) 3.73 (1 H, dd, *J* 4.8 and 2.9, CHOSi), 3.42 (1 H, dt, *J* 8.7 and 2.5, C*H*OH), 2.45 (1 H, dqq, *J* 8.7, 6.8 and 2.3, MeCCC*H*Me), 2.35 (1 H, d, *J* 2.7, OH), 2.22 (1 H, qt, *J* 7.0 and 2.7, CHOHC*H*MeCHOSi), 1.76 (3 H, d, *J* 2.3, MeCC), 1.61 (1 H, m, EtMeC*H*), 1.43 (1 H, m, C*H*AHBMe), 1.19 (3 H, d, *J* 6.8, MeCCC*Me*H), 1.12 (1 H, m, CHA*H*BMe under MeCCC*Me*H), 0.90 (9 H, s, SitBu), 0.95-0.87 (9 H, under tBu, CH2*Me*, Et*Me*CH and CHOHCH*Me*CHOSi), 0.10 (3 H, s, Si*Me*AMeB) and 0.08 (3 H, s, SiMeA*Me*B); **C(100 MHz; CDCl3) 81.3, 79.9, 76.7, 40.8, 36.5, 30.3, 26.1 (double intensity), 23.8, 18.3, 17.5, 15.2, 12.3, 7.9, 3.5, –3.4 and –4.5; *m*/*z* (EI) 269 (25.9%, M+ – C4H9), 251 (15, M – C4H9 – H2O), 201 (75, M – MeCCCHMeCHOHCHMe), 115 (25, tBuMe2Si), 75 (100, Me2Si=OH) and 67 (35, MeCCCHMe)(Found: M+ – C4H9, 269.1929).

**(4*R*,5*S*,6*R*,7*R*,8*R*)-7-(Triisopropylsilyloxy)-4,6,8-trimethyldec-2-yn-5-ol 148**

Similarly, titanium tetrachloride (1 mol dm–3 solution in CH2Cl2, 2.26 cm3, 2.26 mmol), the aldehyde **139** (0.566 g, 1.88 mmol) and the (*S*)-allenylsilane18 (0.76 mol dm–3 solution in CH2Cl2-pentane ~1:1, 2.97 cm3, 2.26 mmol) gave the mixture (88:12, measured by integration of the CHOSi signals in the 1H NMR spectrum) of alcohols (0.498 g, 74%); further chromatography gave the major *alcohol* **148**; *R*f[Et2O-light petroleum (bp 40-60 °C), 1:3] 0.53; []D20 22.9 (*c*. 0.90 in CHCl3); **max(film)/cm–1 3531 (OH), 2245 (CC) and 1258 (SiC); **H(400 MHz; CDCl3) 3.97 (1 H, dd, *J* 4.1 and 2.4, CHOSi), 3.46 (1 H, br dt, *J* 9.1 and 2.4, C*H*OH), 2.46 (1 H, m, C*H*MeCC), 2.38 (1 H, d, *J* 2.8, OH), 2.27 [1H, qt, *J* 7.0 and 2.4, CH(OH)C*H*MeCHOSi], 1.77 (3 H, d, *J* 2.4, CCMe), 1.69 (1 H, m, C*H*MeEt), 1.39 (1 H, dqd, *J* 20.5, 7.1 and 2.2, C*H*AHBMe), 1.21 (3 H, d, *J* 6.8, CCCH*Me*), 1.20 (1 H, m, CHA*H*BMe), 1.15 (21 H, br s, SiiPr3), 0.97 [3 H, d, *J* 7.0, CH(OH)CH*Me*CHOSi] and 0.93 (3 H, t, *J* 7.1, CH2*Me*); **C(100 MHz; CDCl3) 81.3+ (*C*C), 80.8 (overlapping *C*HOH and *C*HOSi), 77.1+ (C*C*), 41.9 (*C*HMeEt), 36.2 [CH(OH)*C*HMeCHOSi], 30.4 (CC*C*HMe), 26.9+ (*C*H2Me), 18.33 (SiCH*Me*AMeB), 18.27 (SiCHMeA*Me*B), 17.8 (CCCH*Me*), 15.0 [CH(OH)CH*Me*CHOSi], 13.5 (Si*C*HMe2), 12.3 (CH2*Me*), 7.7 (CH*Me*Et) and 3.4 (CC*Me*); *m*/*z* (EI) 325 (21%, M+ – iPr), 243 (51, EtMeCHCHOSiiPr3), 217 (100, EtMeCHCHOSiiPr2Me), 175 (28, iPr3SiOH2), 157 (19, SiiPr3), 131 (43, iPr2Si=OH), 103 (28, iPrMeSi=OH) and 75 (25, Me2Si=OH)(Found: M+ – iPr, 325.2560. C22H44SiO2 requires *M* – iPr, 325.2563), and the minor alcohol, (4R,5R,6R,7R,8R)-7-*triisopropylsilyloxy*-4,6,8-*trimethyldec*-2-*yn*-5-*ol* **150**; *R*f[light petroleum (bp 40-60 °C)-EtOAc, 15:1] 0.50; **H(400 MHz; CDCl3) 4.04 (1 H, dd, *J* 4.25 and 1.54, CHOSi), 3.30 (1 H, ddd, *J* 9.1, 6.5 and 2.0, C*H*OH), 2.77 (1 H, m, MeCCCMe*H*), 2.60 (1 H, qt, *J* 7.0 and 2.3, CHOHC*H*MeCHOSi), 1.95 (1 H, qn, *J* 7.6, C*H*MeEt), 1.78 (3 H, d, *J* 2.3, MeCC), 1.67-1.54 (2 H, m, C*H*2Me), 1.23 (3 H, d, *J* 7.1, MeCCC*Me*H), 1.09 (21 H, s, SiiPr3), 0.95 (3 H, d, *J* 5.7, CHOHCH*Me*CHOSi), 0.93 (3 H, t, *J* 6.9, CH2*Me*) and 0.84 (3 H, d, *J* 7.0, CH*Me*Et); **C(100 MHz; CDCl3) identifiable peaks at 79.0, 78.1, 76.3, 40.9, 39.9, 30.1, 26.1, 18.2, 16.4, 12.6 and 3.6; *m*/*z* (EI) 369 (8%, M+ + H), 325 (15, M – iPr), 243 (29, EtMeHCCHOSiiPr3), 217 (100, EtMeCHCHOSiiPr2Me), 175 (17, iPr3SiOH), 157 (12, SiiPr3), 131 (32, iPr2Si=OH), 103 (18, iPrMeSi=OH) and 75 (20, Me2Si=OH)(Found: M+ + H, 369.3172). Although separable for the analysis above, the major isomer was carried forward in the following steps contaminated with the minor isomer (94:6).

**(4*R*,5*S*,6*R*,7*R*,8*R*)-5-(Triethylsilyloxy)-7-(triisopropylsilyloxy)-4,6,8-trimethyldec-2-yne**

2,6-Lutidine (0.95 cm3, 8.15 mmol), triethylsilyl triflate (0.70 cm3, 3.26 mmol) and the alcohol **148** (0.58 g, 1.63 mmol) were kept in dry dichloromethane (15 cm3) at room temperature under nitrogen for 24 h. Sodium hydrogen carbonate solution (20 cm3) was added and the layers were separated, and the aqueous layer was extracted with dichloromethane (2  20 cm3). The combined organic layers were washed with brine (20 cm3), dried (Na2SO4) and concentrated under reduced pressure. The residue was chromatographed [SiO2, light petroleum (bp 40-60 °C)] to give the *silyl ether* (contaminated with some silicon-containing impurities) (0.90 g); *R*f[Et2O-light petroleum (bp 40-60 °C), 1:100] 0.40; []D20 –3.6 (*c*. 0.75 in CHCl3); **max(film)/cm–1 1238 (SiO); **H(400 MHz; CDCl3) 3.72 (1 H, dd, *J* 7.0 and 3.9, C*H*OSiEt3), 3.69 (1 H, t, *J* 3.8, C*H*OSiiPr3), 2.62 (1 H, qdq, *J* 6.8, 3.9 and 2.4, C*H*MeCC), 1.81 [1 H, br qn d, *J* 6.9 and 3.8, CH(OSi)C*H*MeCHOSi], 1.77 (3 H, d, *J* 2.4, CCMe), 1.60 (1 H, m, C*H*MeEt), 1.43 (1 H, m, C*H*AHBMe), 1.12 (1 H, obscured m, CHA*H*BMe), 1.10 (21 H, br s, SiiPr3), 1.08 (3 H, d, *J* 6.8, CCCH*Me*), 0.99 (9 H, t, *J* 7.9, SiCH2*Me*), 0.96 [3 H, d, *J* 7.0, CH(OSi)CH*Me*CHOSi], 0.94 (3 H, t, *J* 7.3, CH*Me*Et), 0.90 (3 H, t, *J* 7.4, CHCH2*Me*) and 0.72-0.63 [6 H, m (not first-order), SiC*H*2Me]; **C(100 MHz; CDCl3) 83.4+, 77.5–, 77.3–, 76.3+, 40.9–, 39.1–, 29.8–, 25.1+, 18.5–, 18.4–, 15.5–, 15.1–, 13.7–, 12.4–, 12.0–, 7.1–, 5.5+ and 3.5–; *m*/*z* (ESI) 505 (58%, M+ + Na)(Found: M+ + Na, 505.3867. C28H58O2Si2 requires *M* + Na, 505.3873).

**(*E*,4*R*,5*S*,6*R*,7*R*,8*R*)-5-(Triethylsilyloxy)-7-(triisopropylsilyloxy)-4,6,8-trimethyl-2-dimethyl(phenyl)silyldec-2-en 151**

Dimethyl(phenyl)silyllithium (1.13 mol dm–3 solution in THF, 8.65 cm3, 9.78 mmol) and copper(I) cyanide (0.44 g, 4.89 mmol) were stirred in dry tetrahydrofuran (19 cm3) under nitrogen at 0 C for 40 min, and a solution of the crude alkyne (0.90 g, ≤1.63 mmol) in dry tetrahydrofuran (9.5 cm3) was added dropwise, keeping the temperature below 5 C. The mixture was stirred for 1 h at 0 C and basic ammonium chloride solution (30 cm3) was added. The layers were separated, and the aqueous layer extracted with ether (3  50 cm3). The combined organic layers were washed with basic ammonium chloride solution (4  5 cm3), until the aqueous layer was colourless, and brine (20 cm3), dried (Na2SO4) and concentrated under reduced pressure. The residue was chromatographed [SiO2, light petroleum (bp 40-60 °C)] to give the *vinylsilane* (0.80 g, 79% over 2 steps from the alkyne **148**); *R*f[Et2O-light petroleum (bp 40-60 °C), 1:100] 0.41; []D20 4.1 (*c*. 3.95 in CHCl3); **max(film)/cm–1 1617 (C=C), 1245 (SiMe) and 1107 (SiPh); **H(400 MHz; CDCl3) 7.53 (2 H, m, ArH), 7.40-7.36 (3 H, m, ArH), 5.77 (1 H, dq, *J* 9.4 and 1.4, C=CH), 3.76 (1 H, dd, *J* 4.4 and 2.9, C*H*OSiiPr3), 3.57 (1 H, br t, *J* 5.3, C*H*OSiEt3), 2.82 (1 H, dqd, *J* 9.4, 6.7 and 4.6, C=CHC*H*Me), 1.79 [1 H, br sextet, *J* 6.0, CH(OSi)C*H*MeCHOSi], 1.75 (3 H, d, *J* 1.4, C=CMe), 1.67 (1 H, m, C*H*MeEt), 1.41 (1 H, dqd, *J* 13.5, 7.4 and 3.4, C*H*AHBMe), 1.18 (1 H, obscured m, CHA*H*BMe), 1.13 (21 H, br s, SiiPr3), 1.01 (9 H, t, *J* 8.0, SiCH2*Me*), 0.97 (3 H, d, *J* 7.0, C=CHCHMe), 0.97-0.91 [9 H, m, CH(OSi)CH*Me*CH(OSi)CH*Me*CH2*Me*], 0.64 (6 H, q, *J* 8.0, SiC*H*2Me), 0.38 (3 H, s, Si*Me*AMeB) and 0.37 (3 H, s, SiMeA*Me*B); **C(100 MHz; CDCl3) 145.4–, 138.6+, 133.9–, 132.2+, 128.8–, 127.8–, 78.1–, 77.6–, 40.5–, 39.4–, 36.4–, 24.2+, 18.6–, 18.5–, 15.7–, 15.2–, 15.0–, 13.8–, 12.5–, 12.3–, 7.3–, 5.8+, –3.86– and –3.88–; *m*/*z* (ESI) 641 (100%, M+ + Na)(Found: M+ + Na, 641.4570. C36H70O2Si3 requires *M* + Na, 641.4581).

**(*E*,4*R*,5*S*,6*R*,7*R*,8*R*)-7-(Triethylsilyloxy)-2-iodo-5-(triisopropylsilyloxy)-4,6,8-trimethyldec-2-ene 152**

The vinylsilane **151** (0.80 g, 1.29 mmol) and *N*-iodosuccinimide (2.90 g, 12.9 mmol) were stirred in the dark under nitrogen in dry acetonitrile (14.5 cm3) and tetrahydrofuran (4.5 cm3) at room temperature for 18 h. Sodium sulfite solution (40 cm3) was added slowly at 0 °C. The mixture was extracted with ether-light petroleum (bp 40-60 °C) (1:1, 3  50 cm3) and the combined organic layers were washed with brine (50 cm3), dried (Na2SO4) and concentrated under reduced pressure. The residue was chromatographed (SiO2, hexane) to give the *vinyl iodide* (0.59 g, 75%); *R*f[Et2O-light petroleum (bp 40-60 °C), 1:100] 0.50; []D20 +21.4 (*c*. 1.34 in CHCl3); **max(film)/cm–1 1636 (C=C) and 1241 (SiO); **H(400 MHz; CDCl3) 6.12 (1 H, dq, *J* 10.1 and 1.4, C=CH), 3.69 (1 H, br t, *J* 3.5, C*H*OSiiPr3), 3.52 (1 H, dd, *J* 7.0 and 3.8, C*H*OSiEt3), 2.57 (1 H, dqd, *J* 10.1, 6.6 and 3.8, C=CHC*H*Me), 2.38 (3 H, d, *J* 1.4, C=CMe), 1.72 [1H, br qn d, *J* 6.9 and 3.9, CH(OSi)C*H*MeCHOSi], 1.59 (1 H, m, C*H*MeEt), 1.37 (1 H, dqd, *J* 13.3, 7.5 and 3.7, C*H*AHBMe), 1.12 (1 H, obscured m, CHA*H*BMe), 1.08 (21 H, br s, SiiPr3), 0.98 (9 H, t, *J* 8.0, SiCH2*Me*), 0.98-0.89 [12 H, obscured, CH*Me*CH(OSi)CH*Me*CH(OSi)CH*Me*CH2*Me*], 0.62 (6 H, q, *J* 8.0, SiC*H*2Me); **C(100 MHz; CDCl3) 145.5– (C=*C*H), 93.0+ (*C*=CH), 77.3– (CHOSi), 77.1– (CHOSi), 41.2– (*C*HMeEt), 39.0–, 38.9–, 27.9– (C=C*Me*), 25.1+ (CH*C*H2Me), 18.5–(SiCH*Me*AMeB), 18.4– (SiCHMeA*Me*B), 15.4–, 14.1–, 13.6– (Si*C*HMe2), 12.5–, 12.4–, 7.2– (SiCH2*Me*) and 5.6+ (Si*C*H2Me); *m*/*z* (ESI) 633 (58%, M+ + Na)(Found: M+ + Na, 633.3003. C28H59IO2Si2 requires *M* + Na, 633.2996). A minor product (5%) in some runs, with a doublet at **5.8 and singlet at **2.22, might have beeen the *Z*-stereoisomer.

**Fragment C with *tert*-butyldimethylsilyl protection instead of triethylsilyl**

**(4*R*,5*S*,6*R*,7*R*,8*R*)(*E*)-7-(Triisopropylsilyloxy)-4,6,8-trimethyl-2-dimethyl(phenyl)silyldec-2-en-5-ol.** Following the procedure for the synthesis of the silyl ether **151**, lithium bis[dimethyl(phenyl)silyl]cuprate (9.5 mmol) and the alkyne **148** (1.14 g, 3.18 mmol) were stirred for 1 h at 0 C, and quenched with basic ammonium chloride solution (20 cm3). Workup and chromatography as before [SiO2, Et2O-light petroleum (bp 40-60 °C), 1:40 to 1:10] gave the *vinylsilane*, (contaminated with some silicon-containing impurities) (1.69 g); *R*f[Et2O-light petroleum (bp 40-60 °C), 1:5] 0.43; []D20 12.2 (*c*. 0.58 in CHCl3); **max(film)/cm–1 3542 (OH), 1621 (C=C), 1248 (SiMe) and 1110 (SiPh); **H(400 MHz; CDCl3) 7.47 (2 H, m, ArH), 7.38-7.30 (3 H, m, ArH), 5.51 (1 H, dq, *J* 9.6 and 1.5, C=CH), 3.95 (1 H, br t, *J* 3.1, CHOSi), 3.39 (1 H, br dt, *J* 9.5 and 2.0, C*H*OH), 2.73 (1 H, br tq, *J* 9.5 and 6.5, C=CHC*H*Me), 2.37 (1 H, d, *J* 2.7, OH), 1.80 [1H, br qt, *J* 6.9 and 2.0, CH(OH)C*H*MeCHOSi], 1.70 (3 H, d, *J* 1.5, C=CMe), 1.67 (1 H, m, C*H*MeEt), 1.24 (1 H, m, C*H*AHBMe), 1.11 (1 H, obscured m, CHA*H*BMe), 1.11 (21 H, br s, SiiPr3), 1.04 (3 H, d, *J* 6.5, C=CHCH*Me*), 0.93 (3 H, d, *J* 7.1, CH*Me*Et), 0.91 [3 H, d, *J* 6.9, CH(OH)CH*Me*CHOSi], 0.90 (3 H, t, *J* 7.4, CH2*Me*), 0.32 (3 H, s, Si*Me*AMeB) and 0.31 (3 H, s, SiMeA*Me*B); **C(100 MHz; CDCl3) 144.0, 138.5+, 133.9, 133.5+, 128.9, 127.7, 81.7, 81.1, 42.0, 36.6, 36.0, 27.0+, 18.4, 18.3, 17.3, 15.1, 14.8, 13.5, 12.5, 7.7, 3.3 and 3.5.

**(*E*,4*R*,5*S*,6*R*,7*R*,8*R*)-5-(*tert*-Butyldimethylsilyloxy)-7-(triisopropylsilyloxy)-4,6,8-trimethyl-2-dimethyl(phenyl)silyldec-2-ene.** The crude alcohol (1.69 g, ≤3.18 mmol), 2,6-lutidine (1.85 cm3, 15.9 mmol) and *tert*-butyldimethylsilyl triflate (1.31 cm3, 5.72 mmol) were mixed in dry dichloromethane (15 cm3) at 0 C under nitrogen, and kept at room temperature for 18 h. Water (10 cm3) was added, the layers separated, and the aqueous layer extracted with dichloromethane (3  5 cm3). The combined organic layers were dried (Na2SO4) and concentrated under reduced pressure. The residue was chromatographed [SiO2, light petroleum (bp 40-60 °C)] to give the silyl ether (contaminated with some silicon-containing impurities) (1.34 g); *R*f[Et2O-light petroleum (bp 40-60 °C), 1:5] 0.76; []D20 +0.0 (*c*. 2.44 in CHCl3); **max(film)/cm–1 1620 (C=C), 1250 (SiMe) and 1110 (SiPh); **H(400 MHz; CDCl3) 7.48 (2 H, m, ArH), 7.36-7.30 (3 H, m, ArH), 5.75 (1 H, dq, *J* 9.5 and 1.7, C=CH), 3.69 (1 H, dd, *J* 5.1 and 2.8, C*H*OSiiPr3), 3.50 (1 H, br t, *J* 5.1, C*H*OSiMe2tBu), 2.76 (1 H, dqd, *J* 9.5, 6.7 and 4.7, C=CHC*H*Me), 1.77 [1H, br sextet, *J* 6.0, CH(OSi)C*H*MeCHOSi], 1.66 (3 H, d, *J* 1.7, C=CMe), 1.62 (1 H, m, C*H*MeEt), 1.38 (1 H, m, C*H*AHBMe), 1.12 (1 H, m, CHA*H*BMe), 1.08 (21 H, br s, SiiPr3), 0.96 (3 H, d, *J* 6.7, C=CHCH*Me*), 0.95-0.89 [9 H, m, CH(OSi)CH*Me*CH(OSi)CH*Me*CH2*Me*], 0.87 (9 H, s, SitBu), 0.32 (3 H, s, Si*Me*AMeBPh), 0.31 (3 H, s, SiMeA*Me*BPh) and 0.02 (6 H, br s, Si*Me*2tBu); **C(63 MHz; CDCl3) 146.7–, 139.1+, 133.9–, 131.4–, 128.7–, 127.6–, 78.2–, 40.4–, 39.5–, 36.9–, 26.3–, 26.1–, 24.0+, 18.7–, 18.5–, 18.5+, 15.6–, 15.4–, 14.9–, 14.2–, 13.7–, 12.5–, 12.3–, –3.0–, –3.4–, –3.7– and –3.8–; *m*/*z* (ESI) 641.5 (50%, M+ + Na) (Found: M+ + Na, 641.4602. C36H70O2Si2 requires *M* + Na, 641.4584).

**(4*R*,5*S*,6*S*,7*R*,8*R*)(*E*)-5-(*tert*-Butyldimethylsilyloxy)-2-iodo-7-(triisopropylsilyloxy)-4,6,8-trimethyldec-2-ene.** The vinylsilane (1.34 g, ≤2.16 mmol) and *N*-iodosuccinimide (7.29 g, 32.4 mmol) were stirred in dry acetonitrile and tetrahydrofuran, as in the preparation of the vinyl iodide **152**, to give the *vinyl* *iodide* (0.905 g, 47% over 3 steps from the alkyne); *R*f[Et2O-light petroleum (bp 40-60 °C), 1:5] 0.73; []D20 +26.7 (*c*. 2.16 in CHCl3); **max(film)/cm–1 1638 (C=C) and 1254 (SiO); **H(400 MHz; CDCl3) 6.13 (1 H, dq, *J* 10.3 and 1.4, C=CH), 3.67 (1 H, br t, *J* 3.6, C*H*OSiiPr3), 3.49 (1 H, dd, *J* 6.8 and 3.5, C*H*OSiMe2tBu), 2.55 (1 H, dqd, *J* 10.3, 6.8 and 3.5, C=CHC*H*Me), 2.37 (3 H, d, *J* 1.4, C=CMe), 1.75 [1H, qn d, *J* 6.8 and 4.0, CH(OSi)C*H*MeCHOSi], 1.60 (1 H, m, C*H*MeEt), 1.38 (1 H, dqd, *J* 13.3, 7.5 and 3.8, C*H*AHBMe), 1.12 (1 H, obscured m, CHA*H*BMe), 1.09 (21 H, br s, SiiPr3), 0.96 (3 H, d, *J* 6.8, C=CHCH*Me*), 0.95-0.90 [9 H, m, CH(OSi)CH*Me*CH(OSi)CH*Me*CH2*Me*], 0.92 (9 H, s, SitBu), 0.08 (3 H, s, Si*Me*AMeB) and 0.05 (3 H, s, SiMeA*Me*B); **C(100 MHz; CDCl3) 145.6 (C=*C*H), 92.8+ (*C*=CH), 77.4 (*C*HOSiiPr3), 76.3 (*C*HOSiMe2tBu), 41.2 (*C*HMeEt), 39.4 (C=CH*C*H), 38.8 [CH(OSi)*C*HMeCHOSi], 27.8 (C=C*Me*), 26.3 (SiC*Me*3), 25.0+ (*C*H2Me), 18.9+ (Si*C*Me3), 18.5 (SiCH*Me*AMeB), 18.4 (SiCHMeA*Me*B), 15.5, 14.3, 13.6 (Si*C*HMe2), 12.6, 12.5, 3.0 (Si*Me*AMeB) and 3.9 (SiMeA*Me*B); *m*/*z* (ESI) 633.3 (60%, M+ + Na)(Found: M+ + Na, 633.2997. C28H59IO2Si2 requires *M* + Na, 633.3996).

**Fragment C with benzyl protection instead of triethylsilyl**

**(4*R*,5*S*,6*R*,7*R*,8*R*)-5-Benzyloxy-7-triisopropylsilyloxy-4,6,8-trimethyldec-2-yne.** The acetylenic alcohol **148** (460 mg, 1.25 mmol, 86:14 mixture of isomers), sodium hydride (60% dispersion in mineral oil, prewashed with hexane, 85.5 mg, 3.75 mmol), tetrabutylammonium iodide (0.05 mol% in dry THF, 23 mg) and freshly distilled benzyl bromide (0.38 cm3, 3.12 mmol) were stirred in THF (10 cm3) under an argon atmosphere at 0 °C and the mixture heated to reflux for 18 h. More tetrabutylammonium iodide (spatula tip of crystals added directly because of its poor solubility in THF) and benzyl bromide (0.2 cm3) were added and the mixture refluxed for a further 3 h. The mixture was allowed to cool, diluted with ethyl acetate (15 cm3) and washed with brine (3  15 cm3). The combined aqueous layers were extracted with ethyl acetate (3  20 cm3) and the combined organic fractions were dried (MgSO4) and concentrated under reduced pressure. Chromatography of the residue [SiO2, light petroleum (bp 40-60 °C)-CH2Cl2, 3:1] gave the *benzyl ether* (430 mg, 77%); *R*f[light petroleum (bp 40-60 °C)-CH2Cl2, 3:1] 0.33. **max(film)/cm–1 1605 (C=C), 1244 (SiC), 1056 (SiO) and 883 (SiC); **H(400 MHz; CDCl3) 7.42-7.24 (5 H, m, ArH), 4.78 (1 H, d, *J* 10.9, OC*H*AHBPh), 4.58 (1 H, d, *J* 10.9, OCHA*H*BPh), 3.75 (1 H, t, *J* 4.1, CHOSi), 3.43 (1 H, t, *J* 5.6, C*H*OBn), 2.70 (1 H, m, MeCCCMe*H*), 2.05 (1 H, sextet, *J* 6.7, CHOBnC*H*MeCHOSi), 1.78 (3 H, d, *J* 2.3, MeCC), 1.64 (1 H, qnd, *J* 6.7 and 3.4, C*H*MeEt), 1.51-1.45 (1 H, m, C*H*CHDMe), 1.20 (3 H, d, *J* 6.8, MeCCC*Me*H), 1.15 (1 H, m, CHC*H*DMe under SiiPr3), 1.09 (21 H, s, SiiPr3), 1.02 (3 H, d, *J* 6.9, CHOBnCH*Me*CHOSi), 0.92 (3 H, d, *J* 6.8, CH*Me*Et) and 0.90 (3 H, t, *J* 7.4, CH2*Me*); **C(100 MHz; CDCl3) recognisable signals at 136.9, 129.0, 128.8, 128.2, 127.7, 127.1, 84.4, 82.7, 74.8, 40.9, 38.7, 33.6, 28.2, 25.3, 18.5, 16.4, 15.5, 13.3, 12.1, 11.0 and 3.5; *m*/*z* (EI) 415 (12%, M – iPr), 243 (49, EtMeCHCHOSiiPr3), 157 (10, SiiPr3), 131 (11, iPr2Si=OH), 103 (6, iPrMeSi=OH), 91 (100, CH2Ph) and 75 (9, Me2Si=OH)(Found: M+ – iPr, 415.3034. C29H50SiO2 requires *M* – iPr, 415.3032).

**(*E*,4*R*,5*S*,6*R*,7*R*,8*R*)-5-Benzyloxy-2-dimethylphenylsilyl-7-triisopropylsilyloxy-4,6,8-trimethyldec-2-ene**. Lithium bis[dimethyl(phenyl)silyl]cuprate (0.7 mmol) and the alkyne (100 mg, 0.22 mmol) were stirred for 1 h at 0 C, and quenched with basic ammonium chloride solution (3 cm3). Workup and chromatography as before [SiO2, light petroleum (bp 40-60 °C)-CH2Cl2, 6:1] gave the *vinylsilane* (110 mg, 87%); *R*f[light petroleum (bp 40-60 °C)-CH2Cl2, 6:1] 0.21. **max(film)/cm–1 1617 (C=C), 1247 (SiC), 1057 (SiO) and 832 (SiC); **H(400 MHz; CDCl3) 7.50-7.28 (10 H, m, ArH), 5.75 (1 H, dq, *J* 9.6 and 1.7, C=CH), 4.56 (1 H, d, *J* 11.1, C*H*AHBPh), 4.52 (1 H, d, *J* 11.1, CHA*H*BPh), 3.77 (1 H, dd, *J* 4.9 and 3.1, CHOSi), 3.22 (1 H, t, *J* 5.6, C*H*OBn), 2.90 (1 H, dqn, *J* 9.5 and 6.6, MeC=CCMe*H*), 1.90 (1 H, br q, *J* 5.3, CHOBnC*H*MeCHOSi), 1.67 (3 H, d, *J* 1.7, C=CMe), 1.63 (1 H, m, C*H*MeEt), 1.40 (1 H, m, C*H*AHBMe), 1.18 (1 H, m, CHA*H*BMe, obscured under SiiPr3), 1.10 [3 H, s, Si(C*H*Me2)3], 1.06 [18 H, s, Si(CH*Me*2)3], 1.02 (3 H, d, *J* 7.0, C=CCH*Me*), 1.02 (3 H, d, *J* 6.6, CHOBnCH*Me*CHOSi), 0.91 (3 H, d, *J* 6.8, CH*Me*Et), 0.89 (3 H, t, *J* 7.5, CH2*Me*), 0.30 (3 H, s, Si*Me*AMeB) and 0.29 (3 H, s, SiMeA*Me*B); **C(100 MHz; CDCl3) recognisable signals at 145.1, 139.0, 138.5, 133.9, 132.7, 128.8, 128.3, 127.7, 127.4, 127.3, 85.3, 77.8, 75.4, 53.4, 41.1, 38.8, 36.4, 25.0, 18.5, 15.8, 15.3, 14.9, 13.5, 12.6, 11.1 and –3.4; *m*/*z* (EI) 551 (56%, M+ – iPr), 243 (100, EtMeCHCHOSiiPr3), 157 (9, SiiPr3), 135 (36, SiMe2Ph) and 91 (48, CH2Ph)(Found: M+ – iPr, 551.3743. C37H62SiO2 requires *M* – iPr, 551.3740).

**(*E*,4*R*,5*S*,6*R*,7*R*,8*R*)-5-Benzyloxy-2-iodo-7-triisopropylsilyloxy-4,6,8-trimethyldec-2-ene.** The vinylsilane (55 mg, 0.094 mmol) and *N*-iodosuccinimide (111 mg, 0.47 mmol) were stirred in dry acetonitrile and tetrahydrofuran, as in the preparation of the vinyl iodide **152**, to give the vinyl iodide (50 mg, 90%); *R*f[CH2Cl2-light petroleum (bp 40-60 °C), 1:4] 0.40; **max(film/cm–1) 1633 (C=C), 1059 (SiO) and 882 (SiC); **H(500 MHz; CDCl3) 7.55-7.27 (5 H, m, ArH), 6.11 (1 H, d, *J* 10.1, C=CH), 4.59 (1 H, d, *J* 11.0, C*H*AHBPh), 4.54 (1 H, d, *J* 11.0, CHA*H*BPh), 3.75 (1 H, t, *J* 3.8, CHOSi), 3.23 (1 H, t, *J* 5.4, C*H*OBn), 2.69 (1 H, m, C=C*H*Me), 2.39 (3 H, s, C=CMe), 1.89 (1 H, sextet, *J* 6.5, CHOBnC*H*MeCHOSi), 1.63 (1 H, m, C*H*MeEt), 1.43 (1 H, m, C*H*AHBMe), 1.20 (1 H, m, CHA*H*BMe obscured under Si*i*Pr3), 1.12 [3 H, s, Si(C*H*Me2)3], 1.09 [18 H, s, Si(CH*Me*2)3], 1.03 (6 H, d, *J* 6.6, C=CH*Me* and CHOBnCH*Me*CHOSi), 0.94 (3 H, d, *J* 7.2, CH*Me*Et) and 0.93 (3 H, t, *J* 7.2, CH2*Me*); *m*/*z* (EI) 543 (68%, M+ – iPr), 243 (100, EtCHMeCHOTIPS) and 91 (88, Bn)(Found: M+ – iPr, 543.2163. C29H51ISiO2 requires *M* – iPr, 543.2157).

**(2*S*,5*S*,6*S*)-2-*tert*-Butyl-6-[(*E*,2*S*,3,6*R*,7*S*,8*S*,9*R*,10*R*)-7-(triethylsilyloxy)-3-hydroxy-9-(triisopropylsilyloxy)-4,6,8,10-tetramethyldodec-4-en-2-yl]-5-methyl-1,3-dioxan-4-one 153**

Following and slightly modifying Kishi,124 all operations were performed under dry argon, all glassware was rigorously dried at 2 mmHg with a heat gun before use, and the aldehyde **72** (40.3 mg, 0.177 mmol) and the vinyl iodide **152** (281 mg, 0.460 mmol) were dried by azeotroping from dry toluene (2  2 cm3). The two components were dissolved in dry, degassed tetrahydrofuran (3 and 7 cm3 respectively). The vinyl iodide, followed immediately by the aldehyde, were added to a mixture of anhydrous chromium(II) chloride (380 mg, 3.09 mmol) and a speck of nickel(II) chloride (dried at 2 mmHg with a heat gun before use) in dry, degassed dimethyl sulfoxide (12 cm3). The mixture was then stirred gently, so that the chromium(II) chloride was only gradually abraded, for 60 h, after which time the dark green-black mixture was cooled in ice-water and quenched with potassium L-serinate {1 mol dm–3 solution in water [prepared from potassium carbonate (1.3 g) and L-serine (3.15 g, 30 mmol) and water (30 cm3)], 10 cm3} so as to adjust the alkalinity to pH 8 (N.B. sharp exotherm), with vigorous stirring for 5 min. The purple mixture was poured into ether-light petroleum (bp 40-60 °C) (1:1, 40 cm3), and the mixture shaken until the organic layer was clear. The layers were separated, and the aqueous layer extracted with ether-light petroleum (bp 40-60 °C) (1:1, 3  20 cm3). The combined organic layers were washed with water (15 cm3), brine (15 cm3), dried (Na2SO4) and concentrated under reduced pressure. The residue was chromatographed [SiO2, Et2O-light petroleum (bp 40-60 °C), 1:30 to 1:8] to give a mixture (77:23) of the *allylic alcohols* (52.2 mg, 41% based on aldehyde); **max(film)/cm–1 1731 (C=O); *m*/*z* (ESI) 736 (100%, M+ + Na)(Found: M+ + Na, 735.5365. C40H80O6Si2 requires *M* + Na, 735.5386). The isomers were separated for spectroscopic analysis, but they were recombined for the subsequent reaction. Major alcohol (probably, from Felkin-Anh control, the *S*-isomer at the CHOH stereocentre, but chelation control cannot be ruled out): *R*f[Et2O-light petroleum (bp 40-60 °C), 1:1] 0.53; **H(400 MHz; CDCl3) 5.38 (1 H, br d, *J* 9.5, C=CH), 4.91 (1 H, s, C*H*tBu), 4.03 (1 H, dd, *J* 9.6 and 1.9, C*H*OH), 3.72 (1 H, br t, *J* 3.3, C*H*OSiiPr3), 3.71 [1 H, dd, *J* 9.2 and 2.5, C*H*(OCHtBu)], 3.54 (1 H, dd, *J* 6.8 and 4.0, C*H*OSiEt3), 3.23 (1 H, dq, *J* 9.2 and 7.3, C*H*MeCO2), 2.59 (1 H, dqd, *J* 9.5, 6.8 and 4.0, C=CC*H*Me), 2.06 (1 H, dqd, *J* 9.6, 7.1 and 2.5, C*H*MeCHOH), 1.72 [1 H, br qn d, *J* 6.7 and 4.1, CH(OSi)C*H*MeCHOSi], 1.63 (3 H, br s, C=CMe), 1.59 (1 H, obscured m, C*H*MeEt), 1.54 (1 H, s, OH), 1.38 (1 H, obscured, C*H*AHBMe), 1.34 (3 H, d, *J* 7.3, CH*Me*CO2), 1.12 (1 H, obscured, CHA*H*BMe), 1.07 (21 H, br s, SiiPr3), 1.00 (9 H, s, CHt*Bu*), 0.98 (9 H, t, *J* 7.9, SiCH2*Me*), 0.95-0.87 [12 H, obscured, CH*Me*CH(OSi)CH*Me*CH(OSi)CH*Me*CH2*Me*], 0.79 (3 H, d, *J* 7.1, CH*Me*CHOH) and 0.64 (6 H, q, *J* 7.9, SiC*H*2Me); **C(125 MHz; CDCl3) (peaks not assignable to a particular isomer in italics) 172.8+, 134.4+, 133.6, 107.4, 83.0, 79.6, 77.6, 77.4, 40.9, 38.9, 38.8, 38.3, 35.4+, 24.9+, 23.9, 18.5, 18.4, *15.79*, *15.76*, *15.8*, *14.7*, *14.5*, *14.46*, *14.3*, *14.15*, *14.07–*, 13.6, *12.6*, *12.24*, *12.17*, *10.8*, *9.7–*, 7.2 and 5.7+, and minor alcohol, probably the *R*-isomer at the CHOH stereocentre: *R*f[Et2O-light petroleum (bp 40-60 °C), 1:1] 0.48; **H(400 MHz; CDCl3) 5.49 (1 H, br d, *J* 9.9, C=CH), 4.88 (1 H, s, C*H*tBu), 4.37 (1 H, br s, C*H*OH), 3.71 (1 H, obscured, C*H*OSiiPr3), 3.67 [1 H, dd, *J* 9.7 and 4.5, C*H*(OCHtBu)], 3.53 (1 H, obscured, C*H*OSiEt3), 2.82 (1 H, dq, *J* 9.7 and 7.3, C*H*MeCO2), 2.59 (1 H, obscured, C=CC*H*Me), 2.14 (1 H, d, *J* 1.6, OH), 1.87 (1 H, qdd, *J* 7.2, 4.5 and 1.8, C*H*MeCHOH), 1.72 [1 H, obscured, CH(OSi)C*H*MeCHOSi], 1.60 (1 H, obscured, C*H*MeEt), 1.58 (3 H, br s, C=CMe), 1.40 (1 H, obscured, C*H*AHBMe), 1.32 (3 H, d, *J* 7.3, CH*Me*CO2), 1.12 (1 H, obscured, CHA*H*BMe), 1.07 (21 H, br s, SiiPr3), 0.99-0.87 [33 H, obscured, SiCH2*Me*, CHt*Bu*, CH*Me*CHOH and CH*Me*CH(OSi)CH*Me*CH(OSi)CH*Me*CH2*Me*] and 0.64 (6 H, q, *J* 7.9, SiC*H*2Me); **C(125 MHz; CDCl3) 171.7+, 132.9+, 129.3, 107.9, 84.3, 78.1, 77.7, 72.7, 40.3, 39.3, 39.1, 38.4, 35.3+, 24.1+, 23.9–, 18.5, 18.4, 13.7, 7.2– and 5.7+; *m*/*z* (ESI) 736 (100%, M+ + Na). Byproducts from this and other runs were (1) the result of protodeiodination (Z,4R,5S,6S,7R,8R)-5-(*triethylsilyloxy*)-7-(*triisopropylsilyloxy*)-4,6,8-*trimethyldec*-2-*ene* (100 mg), contaminated with other impurities; *R*f[Et2O-light petroleum (bp 40-60 °C), 1:1] 0.79; **max(film)/cm–1 1240 (SiO); **H(400 MHz; CDCl3) 5.41 (1 H, dq, *J* 10.8 and 6.5, CH=C*H*Me), 5.33 (1 H, br t, *J* 10.8, C*H*=CHMe), 3.74 (1 H, dd, *J* 4.6 and 2.9, C*H*OSiiPr3), 3.53 (1 H, br t, *J* 5.4, C*H*OSiEt3), 2.67 (1 H, m, C=CC*H*Me), 1.77 [1 H, br sextet, *J* 6.0, CH(OSi)C*H*MeCHOSi], 1.64 (1 H, obscured, C*H*MeEt), 1.63 (3 H, br d, *J* 6.5, C=CMe), 1.42 (1 H, m, C*H*AHBMe), 1.14 (1 H, m, CHA*H*BMe), 1.10 (21 H, br s, SiiPr3), 0.99 (9 H, t, *J* 8.0, SiCH2*Me*), 0.97-0.84 [12 H, obscured, CH*Me*CH(OSi)CH*Me*CH(OSi)CH*Me*CH2*Me*] and 0.65 (6 H, q, *J* 8.0, SiC*H*2Me); **C(100 MHz; CDCl3) 134.9–, 122.3, 78.0, 77.9, 40.7, 39.2, 35.0, 24.4+ (*C*H2Me), 18.51 (SiCH*Me*AMeB), 18.45 (SiCHMeA*Me*B), 15.7, 15.5, 13.7 (Si*C*HMe2), 13.1, 12.5, 12.2, 7.2 (SiCH2*Me*) and 5.8+ (Si*C*H2Me); *m*/*z* (ESI) 507 (29%, M+ + Na) (Found: M+ + Na, 507.4042. C28H60O2Si2 requires *M* + Na, 507.4030), and (2) the result of reaction with acetone, (E,5R,6S,7R,8R,9R)-2,3,5,7,9-*pentamethyl*-6-(*triethylsilyloxy*)-8-(*triisopropylsilyloxy*)-*undec*-3-*en*-2-*ol* **162** (13% from the vinyl iodide); *R*f[Et2O-light petroleum (bp 40-60 °C), 1:1] 0.57; **max(film)/cm–1 3355 (OH); **H(400 MHz; CDCl3) 5.43 (1 H, dq, *J* 9.8 and 1.2, C=CH), 3.70 (1 H, dd, *J* 4.7 and 2.9, C*H*OSiiPr3), 3.50 (1 H, dd, *J* 6.0 and 4.6, C*H*OSiEt3), 2.53 (1 H, dqd, *J* 9.8, 6.6 and 4.6, C=CC*H*Me), 1.71 [1 H, br qn d, *J* 6.5 and 5.0, CH(OSi)C*H*MeCHOSi], 1.68 (3 H, d, *J* 1.2, C=CMe), 1.61 (1 H, m, C*H*MeEt), 1.38 (1 H, m, C*H*AHBMe), 1.32 (3 H, s, C*Me*AMeB), 1.30 (3 H, s, CMeA*Me*B), 1.26 (1 H, s, OH), 1.13 (1 H, m, CHA*H*BMe), 1.07 (21 H, br s, SiiPr3), 0.98 (9 H, t, *J* 7.9, SiCH2*Me*), 0.97-0.84 [12 H, obscured, CH*Me*CH(OSi)CH*Me*CH(OSi)CH*Me*CH2*Me*] and 0.64 [6 H, q (not first order), SiC*H*2Me]; **C(100 MHz; CDCl3) 139.7+ (*C*=CH), 126.5 (C=*C*H), 78.0 (*C*HOSiiPr3), 77.9 (C*H*OSiEt3), 73.5+ (Me2*C*OH), 40.6 (*C*HMeEt), 39.2 [CH(OSi)*C*HMeCHOSi], 36.0 (C=C*C*HMe), 28.9– (C*Me*2), 24.3+ (*C*H2Me), 18.5 (SiCH*Me*AMeB), 18.4 (SiCHMeA*Me*B), 15.6, 15.2, 13.7 (Si*C*HMe2), 12.8 (C=CCH*Me*), 12.5, 12.3, 7.2 (SiCH2*Me*) and 5.8+ (Si*C*H2Me); *m*/*z* (ESI) 565 (100%, M+ + Na)(Found: M+ + Na, 565.4438. C31H66O3Si2 requires *M* + Na, 565.4448).

**(2*S*,5*S*,6*S*)-2-*tert*-Butyl-6-[(*E*,2*S*,3,6*R*,7*S*,8*S*,9*R*,10*R*)-7-(*tert*-butyldimethylsilyloxy)-3-hydroxy-9-(triisopropylsilyloxy)-4,6,8,10-tetramethyldodec-4-en-2-yl]-5-methyl-1,3-dioxan-4-one**

Similarly a mixture (68:32) of alcohols, like the alcohols **153** but having a *tert*-butyldimethylsilyl group in place of the triethylsilyl group, was prepared from the same aldehyde (37.6 mg, 0.165 mmol) and the corresponding vinyl iodide (209 mg, 0.342 mmol) to give the *allylic alcohols* (56.5 mg, 48%); **max(film)/cm–1 3530 (OH), 1738 (C=O) and 1252 (SiO); *m*/*z* (ESI) 736 (100%, M+ + Na) (Found: M+ + Na, 735.5400. C40H80O6Si2 requires *M* + Na, 735.5386). Major alcohol, probably the *S*-isomer at the CHOH stereocentre: *R*f[Et2O-light petroleum (bp 40-60 °C), 1:1] 0.50; **H(400 MHz; CDCl3) 5.38 (1 H, br d, *J* 9.7, C=CH), 4.91 (1 H, s, C*H*tBu), 4.01 (1 H, dd, *J* 9.6 and 1.8, C*H*OH), 3.72 [1 H, dd, *J* 9.2 and 2.6, C*H*(OCHCtBu)], 3.70 (1 H, br t, *J* 3.1, C*H*OSiiPr3), 3.50 (1 H, dd, *J* 6.6 and 4.0, C*H*OSiMe2tBu), 3.24 (1 H, dq, *J* 9.2 and 7.3, C*H*MeCO2), 2.57 (1 H, m, C=CC*H*Me), 2.05 (1 H, dqd, *J* 9.6, 7.1 and 2.6, C*H*MeCHOH), 1.75 [1 H, qn d, *J* 6.6 and 4.0, CH(OSi)C*H*MeCHOSi], 1.62 (3 H, d, *J* 1.1, C=CMe), 1.60 (1 H, obscured, C*H*MeEt), 1.43 (1 H, br s, OH), 1.40 (1 H, m obscured, C*H*AHBMe), 1.34 (3 H, d, *J* 7.3, CH*Me*CO2), 1.12 (1 H, obscured, CHA*H*BMe), 1.07 (21 H, br s, SiiPr3), 0.99 (9 H, s, CHCt*Bu*), 0.98-0.82 [12 H, obscured, CH*Me*CH(OSi)CH*Me*CH(OSi)CH*Me*CH2*Me*], 0.90 (9 H, s, SitBu), 0.78 (3 H, d, *J* 7.1, CH*Me*CHOH), 0.06 (3 H, s, Si*Me*AMeB) and 0.04 (3 H, s, SiMeA*Me*B); **C(125 MHz; CDCl3) (coincident peaks for both isomers in italics) 172.8+, 134.1+, 133.9, 107.4, 82.9, 79.6, 77.5, 76.9, 38.9, 38.7, 38.3, 35.8, 35.4+, 24.7+, 23.9, 18.7+, 18.5, 18.4, *15.8*, *15.7*, *15.5*, *14.7*, *14.5*, *14.3*, *14.1*, *14.0*, 13.6, *12.5*, *12.33*, *12.30*, 10.7, 2.9 and 3.7, and minor alcohol, probably the *R*-isomer: *R*f[Et2O-light petroleum (bp 40-60 °C), 1:1] 0.44; **H(400 MHz; CDCl3) 5.50 (1 H, br d, *J* 9.9, C=CH), 4.88 (1 H, s, C*H*tBu), 4.36 (1 H, br s, C*H*OH), 3.69-3.63 [2 H, obscured, C*H*(OCHCtBu) and C*H*OSiiPr3], 3.49 (1 H, obscured, C*H*OSiMe2tBu), 2.82 (1 H, dq, *J* 9.7 and 7.3, C*H*MeCO2), 2.57 (1 H, obscured, C=CC*H*Me), 2.15 (1 H, d, *J* 1.8, OH), 1.86 (1 H, m, C*H*MeCHOH), 1.75 [1 H, br sextet, *J* 5.9, CH(OSi)C*H*MeCHOSi], 1.59 (1 H, obscured, C*H*MeEt), 1.57 (3 H, br s, C=CMe), 1.40 (1 H, obscured, C*H*AHBMe), 1.32 (3 H, d, *J* 7.3, CH*Me*CO2), 1.10 (1 H, obscured, CHA*H*BMe), 1.07 (21 H, br s, SiiPr3), 1.00 (9 H, s, CHCt*Bu*), 0.98-0.82 [15 H, obscured, CH*Me*CHOH and CH*Me*CH(OSi)CH*Me*CH(OSi)CH*Me*CH2*Me*], 0.90 (9 H, SitBu), 0.08 (3 H, s, Si*Me*AMeB) and 0.06 (3 H, s, SiMeA*Me*B); **C(125 MHz; CDCl3) 171.7+, 132.6+, 129.5, 107.9, 84.3, 78.1, 77.0, 72.7, 39.3, 39.1, 38.3, 36.3, 35.3+, 26.3, 24.0+, 18.7+, 18.5, 18.4, 13.6, 9.6, 3.7 and 3.8.

**(2*S*,5*S*,6*R*)-2-*tert*-Butyl-6-[(*E*,2*R*,6*R*,7*S*,8*R*,9*R*,10*R*)-3-chloro-7-(triethylsilyloxy)-9-(triisopropylsilyloxy)-4,6,8,10-tetramethyldodec-4-en-2-yl]-5-methyl-1,3-dioxan-4-one 154 and (2*S*,5*S*,6*S*)-2-*tert*-butyl-6-[(*E*,2*S*,6*S*,7*R*,8*R*,9*R*,10*R*)-5-chloro-7-(triethylsilyloxy)-9-(triisopropylsilyloxy)-4,6,8,10-tetramethyldodec-3-en-2-yl]-5-methyl-1,3-dioxan-4-one 155**

Pyridine (0.304 mol dm–3 solution in dry CH2Cl2, freshly-prepared, 0.171 cm3, 52.0 mol) and thionyl chloride (1.72 mol dm–3 solution in dry CH2Cl2, 0.0302 cm3, 52.0 mol) were added dropwise to the mixture of alcohols **153** (37.1 mg, 52.0 mol) in dry dichloromethane (2.5 cm3) at 0 C. The mixture was warmed to room temperature, and stirred for 2 h. Light petroleum (bp 40-60 °C, 3 cm3) was added. The solution was concentrated under reduced pressure to remove most of the dichloromethane, and the residue chromatographed [SiO2, Et2O-light petroleum (bp 40-60 °C), 1:4] to give a mixture (1:2:3:1) of four *allylic chlorides* **154** and **155** (40.7 mg, 100%); **max(film)/cm–1 1747 (C=O); **C(125 MHz; CDCl3) (tentative assignments for the individual isomers are indicated by superscripts) 172.30+ (CH*C*O2**154b**), 172.26+ (CH*C*O2**154a**), 172.0+ (CH*C*O2**155a**), 171.9+ (CH*C*O2**155b**), 136.7+ (*C*=CH**155a**), 135.5+ (*C*=CH**155b**), 135.3– (C=*C*H**154b**), 133.4– (C=*C*H**154a**), 131.3+ (*C*=CH**154b**), 130.7+ (*C*=CH**154a**), 128.1– (C=*C*H**155a**), 127.4– (C=*C*H**155b**), 108.0– (*C*HtBu**155b**), 107.9– (*C*HtBu**155a**), 107.0– (*C*HtBu**154b**), 106.9– (*C*HtBu**154a**), 83.2–, 83.1–, 81.7–, 81.2–, 79.2–, 77.8–, 77.5–, 77.34–, 77.32–, 75.4–, 75.0–, 74.5–, 72.2– (CHCl**155a**), 69.9– (CHCl**154b**), 69.7– (CHCl**155b**), 66.9– (CHCl**154a**), 43.1–, 42.9–, 41.0–, 40.6–, 40.4–, 40.2–, 40.0–, 39.7–, 39.3–, 39.09–, 39.06–, 38.9–, 38.7–, 38.4–, 37.4–, 36.3–, 35.7–, 35.5+ (*C*Me3**155a**+**155b**), 35.3+ (*C*Me3**154b**), 35.2+ (*C*Me3**154a**), 34.4–, 34.0–, 26.4+ (*C*H2Me**155a**), 24.9+ (*C*H2Me**154b**), 24.4+ (*C*H2Me**154a**), 23.85–, 23.81–, 23.78–, 22.7+ (*C*H2Me**155b**), 18.6–, 18.53–, 18.50–, 18.48–, 18.45–, 18.43–, 18.40–, 17.6–, 17.45–, 17.41–, 16.6–, 15.6–, 15.5–, 15.4–, 15.3–, 15.1–, 14.8– 14.6– 14.4–, 13.9–, 13.70–, 13.65– 13.6– 13.3–, 13.2–, 12.54–, 12.48–, 12.46– 12.4–, 12.29–, 12.26– 11.41–, 11.35–, 11.04–, 10.96–, 10.4–, 9.4–, 7.2–, 5.9+, 5.73+ and 5.72+; *m*/*z* (ESI) 718 (12%, M+ – HCl + Na)(Found: M+ – HCl + Na, 717.5265. C40H79ClO5Si2 requires *M* –HCl + Na, 717.5286). The two pairs of isomers were separated for spectroscopic analysis, but all four isomers were combined for use in the subsequent reaction. **154a**: *R*f[Et2O-light petroleum (bp 40-60 °C), 1:3] 0.48; **H(400 MHz; CDCl3) 5.60 (1 H, br d, *J* 9.6, C=CH), 4.88 (1 H, s, C*H*tBu), 4.81 (1 H, br d, *J* 2.4, CHCl), 3.70 (1 H, br t, *J* 3.6, C*H*OSiiPr3), 3.57 [1 H, t, *J* 8.1, C*H*(OCHCtBu)], 3.54 (1 H, obscured, C*H*OSiEt3), 2.65 (1 H, br qn, *J* 7.6, C*H*MeCO2), 2.57 (1 H, m, C=CC*H*Me), 2.06 (1 H, m, C*H*MeCHCl), 1.72 [1 H, m, CH(OSi)C*H*MeCHOSi], 1.69 (3 H, br s, C=CMe), 1.60 (1 H, m, C*H*MeEt), 1.38 (3 H, d, *J* 7.6, CH*Me*CO2), 1.29 (1 H, m, C*H*AHBMe), 1.12 (1 H, m, CHA*H*BMe), 1.07 (21 H, br s, SiiPr3), 1.01 (9 H, s, CHt*Bu*), 0.97 (9 H, t, *J* 7.6, SiCH2*Me*), 0.95-0.82 [15 H, obscured, CH*Me*CHCl and CH*Me*CH(OSi)CH*Me*CH(OSi)CH*Me*CH2*Me*] and 0.64 [6 H, m (not first order), SiCH2], **154b**: *R*f[Et2O-light petroleum (bp 40-60 °C), 1:3] 0.42; **H(400 MHz; CDCl3) 5.43 (1 H, br d, *J* 9.7, C=CH), 4.94 (1 H, s, C*H*tBu), 4.23 (1 H, d, *J* 10.7, CHCl), 3.98 [1 H, dd, *J* 8.5 and 2.5, C*H*(OCHCtBu)], 3.71 (1 H, br t, *J* 3.6, C*H*OSiiPr3), 3.54 (1 H, obscured, C*H*OSiEt3), 2.97 (1 H, br qn, *J* 7.6, C*H*MeCO2), 2.57 (1 H, m, C=CC*H*Me), 2.36 (1 H, dqd, *J* 10.7, 6.7 and 2.5, C*H*MeCHCl), 1.72 [1 H, m, CH(OSi)C*H*MeCHOSi], 1.69 (3 H, br s, C=CMe), 1.60 (1 H, m, C*H*MeEt), 1.40 (3 H, d, *J* 7.4, CH*Me*CO2), 1.29 (1 H, m, C*H*AHBMe), 1.12 (1 H, m, CHA*H*BMe), 1.07 (21 H, br s, SiiPr3), 1.00 (9 H, s, CHt*Bu*), 0.98 (9 H, t, *J* 8.0, SiCH2*Me*), 0.95-0.82 [15 H, obscured, CH*Me*CHCl and CH*Me*CH(OSi)CH*Me*CH(OSi)CH*Me*CH2*Me*] and 0.64 [6 H, m (not first order), SiCH2], **155a**: *R*f[Et2O-light petroleum (bp 40-60 °C), 1:3] 0.30; **H(400 MHz; CDCl3) 5.44 (1 H, br d, *J* 10.0, C=CH), 4.89 (1 H, s, C*H*tBu), 4.27 (1 H, d, *J* 10.7, CHCl), 4.07 (1 H, br d, *J* 9.8, C*H*OSiEt3), 3.72 (1 H, br d, *J* 3.5, C*H*OSiiPr3), 3.47 [1 H, dd, *J* 10.5 and 2.4, C*H*(OCHCtBu)], 2.69 (1 H, dqd, *J* 10.0, 6.8 and 2.4, C*H*MeC=C), 2.51 (1 H, dq, *J* 10.5 and 7.2, C*H*MeCO2), 1.97 (1 H, br dq, *J* 10.7 and 6.7, CHClC*H*Me), 1.71 [1 H, obscured, CH(OSi)C*H*MeCHOSi], 1.67 (3 H, d, *J* 1.1, C=CMe), 1.60 (1 H, obscured, C*H*MeEt), 1.31 (1 H, obscured, C*H*AHBMe), 1.23 (3 H, d, *J* 7.2, CH*Me*CO2), 1.12 (1 H, obscured, CHA*H*BMe), 1.09 (21 H, br s, SiiPr3), 0.99 (9 H, s, CHt*Bu*), 0.94 (9 H, t, *J* 7.0, SiCH2*Me*), 0.91-0.83 [12 H, obscured, and CH*Me*C=C and CH(OSi)CH*Me*CH(OSi)CH*Me*CH2*Me*], 0.69 [6 H, m (not first order), SiCH2] and 0.68 (3 H, d, *J* 6.7, CHClCH*Me*), and **155b**: *R*f[Et2O-light petroleum (bp 40-60 °C), 1:3] 0.30; **H(400 MHz; CDCl3) 5.69 (1 H, br d, *J* 10.0, C=CH), 4.89 (1 H, s, C*H*tBu), 4.43 (1 H, br d, *J* 3.7, CHCl), 3.74-3.70 (2 H, m obscured, C*H*OSiEt3 and C*H*OSiiPr3), 3.47 [1 H, m obscured, C*H*(OCHCtBu)], 2.69 (1 H, dqd, *J* 10.0, 6.8 and 2.4, C*H*MeC=C), 2.44 (1 H, dq, *J* 10.2 and 7.2, C*H*MeCO2), 2.04 (1 H, br qn d, *J* 6.6 and 4.1, CHClC*H*Me), 1.87 [1 H, br qn d, *J* 6.8 and 2.6, CH(OSi)C*H*MeCHOSi], 1.70 (3 H, br s, C=CMe), 1.60 (1 H, m obscured, C*H*MeEt), 1.31 (1 H, obscured, C*H*AHBMe), 1.22 (3 H, d, *J* 7.2, CH*Me*CO2), 1.12 (1 H, obscured, CHA*H*BMe), 1.09 (21 H, br s, SiiPr3), 1.01 (9 H, s, CHt*Bu*), 0.93 (9 H, t, *J* 7.4, SiCH2*Me*), 0.95-0.82 [15 H, obscured, CH*Me*C=C and CH*Me*CH(OSi)CH*Me*CH(OSi)CH*Me*CH2*Me*] and 0.61 [6 H, q (not first order), SiCH2].

**(2*S*,5*R*,6*S*)-2-*tert*-Butyl-6-[(*E*,2*S*,6*R*,7*S*,8*R*,9*R*,10*R*)-7-(triethylsilyloxy)-9-(triisopropylsilyloxy)-4,6,8,10-tetramethyldodec-4-en-2-yl]-5-methyl-1,3-dioxan-4-one 158**

The chlorides **154** and **155** (19.9 mg, 27.2 mol) in dry dichloromethane (2 cm3) were dried over lightly-crushed 4 Å molecular sieves (predried at 10 mmHg using a drying pistol) for 15 min, and transferred to a clean, dry flask by cannula. The solvents were evaporated off at 2 mmHg, and dry tetrahydrofuran [degassed by cooling to –196 C, followed by warming to –78 C at 2 mmHg over 4Å molecular sieves, 6 cm3] was added by cannula. Lithium 4,4'-di-*tert*-butylbiphenyl125 (LDBB)(0.131 mol dm–3 solution in THF, 1.65 cm3, 216 mol, cooled to –78 °C) was added dropwise, allowing the blue-green colour of the reagent to disappear after each drop. The mixture became yellow after the addition of 0.4 cm3 of the reagent, and eventually orange-red by the end of the addition. The mixture was stirred for 1 min. Ammonium chloride solution (saturated, 3.5 cm3) was added rapidly, the mixture was warmed to room temperature, and extracted with ether (4  3 cm3). The combined organic layers were dried (Na2SO4) and concentrated, and the residue was chromatographed [SiO2, light petroleum (bp 40-60 °C) then Et2O-light petroleum (bp 40-60 °C), 1:10] to give the *alkene* (7.0 mg, 37%); *R*f[Et2O-light petroleum (bp 40-60 °C), 1:3] 0.36; **max(film)/cm–1 1734 (C=O); **H(400 MHz; CDCl3) 5.07 (1 H, br d, *J* 9.6, C=CH), 4.89 (1 H, s, C*H*tBu), 3.69 (1 H, dd, *J* 4.9 and 2.8, C*H*OSiiPr3), 3.48 (1 H, br t, *J* 5.4, C*H*OSiEt3), 3.43 [1 H, dd, *J* 9.3 and 3.5, C*H*(OCHtBu)], 2.71 (1 H, qd, *J* 7.2 and 3.5, C*H*MeCO2), 2.53 (1 H, dqd, *J* 9.6, 6.7 and 4.9, C=CC*H*Me), 2.44 (1 H, br d, *J* 12.4, C*H*AHBC=CH), 1.82 (1 H, br tqd, *J* 9.9, 6.8 and 3.0, C*H*MeCH2C=CH), 1.67 [1 H, m, CH(OSi)C*H*MeCHOSi], 1.61 (1 H, m, C*H*MeEt), 1.59 (3 H, br s, C=CMe), 1.56 (1 H, obscured, CHA*H*BC=CH), 1.37 (1 H, m, C*H*AHBMe), 1.24 (3 H, d, *J* 7.2, CH*Me*CO2), 1.13 (1 H, m, CHA*H*BMe), 1.06 (21 H, br s, SiiPr3), 1.00 (9 H, s, CHt*Bu*), 0.96 (9 H, t, *J* 7.9, SiCH2*Me*), 0.95-0.87 [12 H, obscured, CH*Me*CH(OSi)CH*Me*CH(OSi)CH*Me*CH2*Me*], 0.75 (3 H, d, *J* 6.8, CH*Me*CH2C=CH) and 0.61 [6 H, q (not first order), SiC*H*2Me]; **C(100 MHz; CDCl3) 172.9+, 131.9–, 131.0+, 108.6, 80.8, 78.0 (2 coincident peaks), 42.5+, 40.6, 39.3, 38.3, 36.2–, 35.5+, 32.2–, 24.3+, 23.9–, 18.5, 18.4–, 16.7–, 15.7–, 13.73–, 13.70–, 13.4–, 12.5–, 12.3–, 11.7–, 7.2 and 5.8+; *m*/*z* (ESI) 720 (85%, M+ + Na)(Found: M+ + Na, 719.5421. C40H80O5Si2 requires *M* + Na, 719.5442).

**(2*S*,5*R*,6*S*)-2-*tert*-Butyl-6-[(*E*,2*S*,6*R*,7*S*,8*R*,9*R*,10*R*)-7-hydroxy-9-(triisopropylsilyloxy)-4,6,8,10-tetramethyldodec-4-en-2-yl]-5-methyl-1,3-dioxan-4-one**

The silyl ether **158**(7.0 mg, 12.0 mol), glacial acetic acid (1.35 cm3) in THF (1.35 cm3) and water (0.45 cm3) were kept at room temperature for 7 h. Ether (2 cm3) and water (4 cm3) were added, and the stirred mixture carefully neutralized by the addition of solid potassium carbonate. The layers were separated, and the aqueous layer extracted with ether (4  2 cm3). The combined organic layers were dried (Na2SO4) and evaporated under reduced pressure. The residue was chromatographed [Et2O-light petroleum (bp 40-60 °C), 1:10-1:2] to give the *alcohol* (5.4 mg, 78%); *R*f[Et2O-light petroleum (bp 40-60 °C), 1:3] 0.13; **max(film)/cm–1 3423 (OH) and 1732 (C=O); **H(400 MHz; CDCl3) 4.87 (1 H, s, C*H*tBu), 4.86 (1 H, br d, *J* 9.8, C=CH), 3.92 (1 H, dd, *J* 3.8 and 2.6, C*H*OSiiPr3), 3.42 [1 H, dd, *J* 9.3 and 3.4, C*H*(OCHtBu)], 3.34 (1 H, br dt, *J* 9.3 and 2.0, C*H*OH), 2.71 (1 H, qd, *J* 7.2 and 3.4, C*H*MeCO2), 2.48 (1 H, br tq, *J* 9.5 and 6.5, C=CC*H*Me), 2.43 (1 H, br d, *J* 13.1, C*H*AHBC=CH), 2.28 (1 H, d, *J* 2.9, OH), 1.88-1.76 [2 H, m, C*H*MeCH2C=CH and CH(OH)C*H*MeCHOSi], 1.63 (1 H, m, C*H*MeEt), 1.61 (3 H, d, *J* 0.8, C=CMe), 1.59 (1 H, dd, *J* 13.1 and 10.4, CHA*H*BC=CH), 1.28 (1 H, m, C*H*AHBMe), 1.24 (3 H, d, *J* 7.3, CH*Me*CO2), 1.12 (1 H, m, CHA*H*BMe), 1.09 (21 H, br s, SiiPr3), 1.01 (3 H, d, *J* 6.5, C=CHCH*Me*), 0.99 (9 H, s, CHt*Bu*), 0.92 [3 H, d, *J* 7.0, CH(OH)CH*Me*CHOSi], 0.890 (3 H, t, *J* 7.4, CH2*Me*), 0.887 (3 H, d, *J* 7.0, CH*Me*Et) and 0.75 (3 H, d, *J* 6.8, CH*Me*CH2C=CH); **C(125 MHz; CDCl3) 172.9+, 132.2+, 130.4–, 108.6, 81.5–, 81.1, 80.7–, 42.4+, 41.8, 38.3, 36.6, 36.1–, 35.5+, 32.0–, 26.8+, 23.9–, 18.32, 18.26–, 17.9–, 16.8–, 14.9–, 13.7–, 13.4–, 12.4–, 11.7– and 7.8; *m*/*z* (ESI) 605 (100%, M+ + Na)(Found: M+ + Na, 605.4556. C34H66O5Si requires *M* + Na, 605.4577).

**(2*S*,5*R*,6*S*)-2-*tert*-Butyl-6-[(*E*,2*S*,6*R*,8*S*,9*R*,10*R*)-9-(triisopropylsilyloxy)-4,6,8,10-tetramethyl-7-oxododec-4-en-2-yl]-5-methyl-1,3-dioxan-4-one**

The alcohol (5.4 mg, 9.3 mol) and the Dess-Martin periodinane (12 mg, 28.3 mol) were stirred in dry dichloromethane (1.2 cm3) under argon at room temperature for 1 h. Light petroleum (bp 40-60 °C) (2 cm3) was added, the suspension concentrated under reduced pressure and the mixture chromatographed [SiO2, Et2O-light petroleum (bp 40-60 °C), 1:10 to 1:2] to give the *ketone* (3.5 mg, 65%); *R*f[Et2O-light petroleum (bp 40-60 °C), 1:3] 0.21; **max(film)/cm–1 1747 (ester C=O) and 1712 (ketone C=O); **H(400 MHz; CDCl3) 5.06 (1 H, br d, *J* 9.8, C=CH), 4.87 (1 H, s, C*H*tBu), 4.20 (1 H, dd, *J* 5.9 and 3.2, C*H*OSiiPr3), 3.61 (1 H, dq, *J* 9.8 and 6.8, C=CC*H*Me), 3.43 [1 H, dd, *J* 9.3 and 3.4, C*H*(OCHtBu)], 2.79 (1 H, qd, *J* 7.2 and 5.9, C=OC*H*MeCHOSi), 2.72 (1 H, qd, *J* 7.3 and 3.4, C*H*MeCO2), 2.47 (1 H, br d, *J* 12.9, C*H*AHBC=CH), 1.85 (1 H, m, C*H*MeCH2C=CH), 1.71 (3 H, br s, C=CMe), 1.66 (1 H, dd, *J* 13.3 and 2.4, CHA*H*BC=CH), 1.60 (1 H, m, C*H*MeEt), 1.25 (3 H, d, *J* 7.3, CH*Me*CO2), 1.22 (1 H, obscured, C*H*AHBMe), 1.15 (3 H, d, *J* 7.2, COCH*Me*CHOSi), 1.11 (3 H, d, *J* 6.8, C=CHCH*Me*), 1.08 (21 H, br s, SiiPr3), 1.00 (9 H, s, CHt*Bu*), 0.97 (1 H, obscured, CHA*H*BMe), 0.90 (3 H, d, *J* 7.9, obscured, CH*Me*Et), 0.82 (3 H, t, *J* 7.3, CH2*Me*) and 0.76 (3 H, d, *J* 6.7, CH*Me*CH2C=CH); **C(125 MHz; CDCl3) 214.3+, 172.7+, 134.7+, 127.4–, 108.6, 80.7–, 74.9–, 47.0–, 45.0–, 42.6+, 41.8, 38.3, 35.5+, 31.4–, 25.3+, 23.9–, 18.32, 18.28–, 17.2–, 16.4–, 14.4–, 14.3–, 13.6–, 13.1–, 12.3– and 11.8; *m*/*z* (ESI) 603 (100%, M+ + Na)(Found: M+ + Na, 603.4428. C34H64O5Si requires *M* + Na, 603.4421).

**(*E*,2*R*,3*S*,4*S*,8*R*,10*S*,11*R*,12*R*)-3,11-Dihydroxy-2,4,6,8,10,12-hexamethyl-9-oxotetradec-6-enoic acid 159**

The ketone (3.0 mg, 5.2 mol) was stirred in acetone (0.3 cm3) and hydrochloric acid solution (3 mol dm–3, 0.2 cm3) at room temperature for 24 h. The mixture was extracted with ether (4  1 cm3) and the extracts dried (Na2SO4) and evaporated under reduced pressure. TLC and 1H NMR spectroscopy of the residue indicated that the reaction was incomplete, so the material was dissolved in acetone (0.6 cm3), and stirred with hydrochloric acid solution (3 mol dm–3, 0.4 cm3) at room temperature for 48 h. The mixture was extracted with ether (4  1 cm3) and the extracts dried (Na2SO4) and evaporated under reduced pressure to give an oil (2 mg), TLC and 1H NMR spectroscopy of which indicated that all of the starting material had been consumed, and that both protecting groups had been removed. This precious material was used in the next step without purification or characterisation.

**(3*R*,4*S*)-4-[(*E*,2*S*,6*R*,8*S*,9*R*,10*R*)-9-hydroxy-4,6,8,10-tetramethyl-7-oxododec-4-en-2-yl]-3-methyloxetan-2-one 160 [C-2 *epi* (–)-ebelactone A] and (3*R*,4*S*)-4-[(*E*,2*S*,6*R*,8*S*,9*R*,10*R*)-9-benzenesulfonyloxy-4,6,8,10-tetramethyl-7-oxododec-4-en-2-yl]-3-methyloxetan-2-one 161**

The dihydroxy acid (<1.8 mg, <5.1 mol) and freshly-distilled benzenesulfonyl chloride (2 drops, ~0.0046 cm3, ~36 mol) were agitated in dry pyridine (0.05 cm3) at 4 C for 36 h. After this time, a further portion of benzenesulfonyl chloride (1 drop, ~0.0023 cm3, ~18 mol) was added at 0 C. After a further 14 h at 4 C, ice (~20 mg) was added, and the mixture agitated for 2 min. Saturated copper(II) sulfate solution (1 cm3) was added, and the mixture extracted with ether (4  1 cm3). The extracts were dried (Na2SO4) and concentrated under reduced pressure. The residue was chromatographed [SiO2, Et2O-light petroleum (bp 40-60 °C), 1:8 to 1:1] to give a mixture of the *-lactone* **160** and its *benzenesulfonate* **161** and smaller amounts of three unidentified compounds (total <1 mg), approximately 4:7:2:2:2, respectively; *R*f(EtOAc-light petroleum (bp 40-60 °C), 2:3] 0.46 and 0.39; **max(film)/cm–1 1822 (-lactone C=O), 1710 (ketone C=O) and 1186 (SO2O); **C(125 MHz; CDCl3), strong enough to be probably only of the benzenesulfonate, 211.5+, 172.4+, 135.5+, 135.2+, 135.1+, 133.5–, 133.4–, 129.0–, 127.7–, 126.5–, 125.0–, 88.3–, 79.1–, 43.0+ and 26.4+. Major product, probably the benzenesulfonate **161**: **H(500 MHz; CDCl3) 7.90 (2 H, m, *o*-ArH), 7.61 (1 H, m, *p*-ArH), 7.53 (2 H, m, *m*-ArH), 4.98 (1 H, dd, *J* 8.8 and 2.7, C=CH), 4.13 (1 H, dd, *J* 10.6 and 6.1, CHOCO), 3.74 (1 H, apparent qn, CHOSO2, identity uncertain), 3.57 (1 H, poorly-resolved dq, C=CC*H*Me), 2.45 (1 H, obscured, C*H*AHBC=CH), 1.67 (3 H, br s, C=CMe), 1.09 (3 H, d, *J* 7.1, CH*Me*), 1.08 (3 H, d, *J* 6.6, CH*Me*) and 0.87 (3 H, t, *J* 7.4, CH2*Me*); *m*/*z* (ESI) 501 (43%, M+ + Na) and 457 (7, M+ – CO2 + Na)(Found: M+ + Na, 501.2271. C26H38O6S requires *M* + Na, 501.2287), and weak signals from the minor product, probably the alcohol **160**: **H(500 MHz; CDCl3) 4.94 (1 H, br d, *J* 10.3, C=CH), 4.14 (1 H, dd, *J* ~9 and 6.0, CHOCO), 3.60 (1 H, poorly-resolved dq, C=CC*H*Me), 3.48 (1 H, obscured, C*H*OH), 3.07 (1 H, d, *J* 2.5, OH), 3.00 (1 H, poorly-resolved dq, *J* 8.6 and 7.2, C*H*MeCO2), 2.85 (1 H, qd, *J* 6.9 and 2.6, C=OC*H*MeCHOH), 2.45 (1 H, obscured, C*H*AHBC=CH) and 1.70 (3 H, br s, C=CMe); *m*/*z* (ESI) 361 (35%, M+ + Na) and 317 (60, M+ – CO2 + Na)(Found: M+ + Na, 361.2342. C20H34O4 requires *M* + Na, 361.2355).

References

78 W. L. F. Armarego and D. D. Perrin, *Purification* *of* *Laboratory* *Chemicals*, 4th ed., Butterworth-Heinemann, Oxford, 1996.

79 I. Fleming, in *Organocopper* *Reagents:* *A* *Practical* *Approach*, ed. R. J. K. Taylor, OUP, Oxford, 1994, Chapter 12, pp. 257-292; I. Fleming, *Encyclopaedia* *of* *Reagents* *for* *Organic* *Synthesis*, ed. L. A. Paquette, Wiley, Chichester, 1995, p. 3037.

80 A. J. Mancuso and D. Swern, *Synthesis*, 1981, 165.

81 J. M. Lamberti and P. H. Wise, *J.* *Am.* *Chem.* *Soc.*, 1953, **75**, 4787.

82 S. Czernecki, C. Georgoulis, and C. Provelenghiou, *Tetrahedron* *Lett.*, 1976, 3535.

83 R. B. Miller and G. McGarvey, *Synth.* *Commun.*, 1978, **8**, 291.

84 K. C. Nicolaou, A. D. Piscopio, P. Bertinato, T. K. Chakraborty, N. Minowa and K. Koide, *Chem.* *Eur.* *J.*, 1995, **1**, 318.

85 A. G. Brook, J. M. Duff and W. F. Reynolds, *J.* *Organomet.* *Chem.*, 1976, **121**, 293.

86 E. J. Corey and P. L. Fuchs, *Tetrahedron* *Lett.*, 1972, 3769.

87 H. J. Bestmann and H. Frey, *Justus*, *Liebigs* *Ann.* *Chem.*, 1980, 2061.

88 H. Jin, J. Uenishi, W. J. Christ and Y. Kishi, *J.* *Am.* *Chem.* *Soc.*, 1986, **108**, 5644.

89 T. Cohen and B.-S. Guo, *Tetrahedron*, 1986, **42**, 2803.

90 H.-J. Liu, J. Yip and K.-S. Shia, *Tetrahedron* *Lett.*, 1997, **38**, 2253.

91 H. Gilman, F. K. Cartledge and S.-Y. Sim, *J.* *Organomet.* *Chem.*, 1963, **1**, 8; G. M. Whitesides, C. P. Casey and J. K. Krieger, *J.* *Am.* *Chem.* *Soc.*, 1971, **93**, 1379.

92 A. P. Krapcho, *Synthesis*, 1982, 805.

93 A. Michael and J. Ross, *J.* *Am.* *Chem.* *Soc.*, 1930, **52**, 4598.

94 K. Takeshita, Y. Seki, K. Kawamoto, S. Murai and N. Sonoda, *J.* *Org.* *Chem.*, 1987, **52**, 4864.

95 I. Fleming, E. Marangon, C. Roni, M. G. Russell and S. Taliansky Chamudis, *Canad.* *J.* *Chem.*, 2004, in press.

96 H. Nagaoka and Y. Kishi, *Tetrahedron*, 1981, **37**, 3873.

97 M. Fujita and T. Hiyama, *J. Org. Chem.*,1988, **53**, 5405.

98 M. C. Weismiller, J. C. Towson and F. A. Davis, *Org. Synth.*, 1993, Coll. Vol. 8, 104; J. C. Towson, M. C. Weismiller, G. S. Lal, A. C. Sheppard and F. A. Davis, *Org. Synth.*, 1993, Coll. Vol. 8, 110; W. Oppolzer, R. J. Mills, W. Pachinger and T. Stevenson, *Helv. Chim. Acta*, 1986, **69**, 1542.

99 D. Crich, X.-Y. Jiao and M. Bruncko, *Tetrahedron*, 1997, **53**, 7127.

100 M. Frigerio, M. Santagostino and S. Sputore, *J. Org. Chem.*, 1999, **64**, 4537.

101 D. A. Evans and M. DiMare, *J. Am. Chem. Soc.*, 1986, **108**, 2476.

102 W. Oppolzer, C. Starkemann, I. Rodriguez and G. Bernardinelli, *Tetrahedron Lett.*, 1991, **32**, 61.

103 W. Oppolzer, J. Blagg, I. Rodriguez and E. Walther, *J. Am. Chem. Soc.*, 1990, **112**, 2767.

104 A. I. Meyers, K. A. Babiak, A. L. Campbell, D. L. Comins, M. P. Fleming, R. Henning, M. Heuschmann, J. P. Hudspeth, J. M. Kane, P. J. Reider, D. M. Roland, K. Shimizu, K. Tomioka and R. D. Walkup, *J. Am. Chem. Soc.*, 1983, **105**, 5015.

105 C. Prakash, S. Saleh and I. A. Blair, *Tetrahedron Lett.*,1989, **30**, 19.

106 W. H. Pirkle and W. V. Turner, *J.* *Org.* *Chem.*, 1975, **40**, 1617.

107 G. Otani and S. Yamada, *Bull. Chem. Soc. Jpn.*, 1973, **21**, 2125.

108 R. Tschesche, G. Lüdke, and G. Wulff, *Chem.* *Ber.*, 1969, **102**, 1253.

109 H. Krimm, US Patent 2768962 (1957)(*Chem. Abstr*., 1957, **51**, 6648f).

110 I. Paterson, S. K. Patel, and J. R. Porter, *Tetrahedron* *Lett.*, 1983, **24**, 3395; T. Wakematsu, H. Nakamura, Y. Nishikimi, K. Yoshida, T. Noda, M. Taniguchi and Y. Ban, *Tetrahedron* *Lett.*, 1986, **27**, 6071.

111 K. B. Sharpless, R. F. Lauer and A. Y. Teranishi, *J. Am. Chem. Soc.*, 1973, **95**, 6137.

112 G. Falsone and B. Spur, *Liebigs Ann. Chem.*, 1982, 191.

113 G. A. Molander and C. R. Harris, *J. Amer. Chem. Soc.*, 1995, **117**, 3705.

114 M. D. Bachi and E. Bosch, *J. Org. Chem.*, 1992, **57**, 4696.

115 A. R. Chamberlin, J. E. Stemke and F. T. Bond, *J. Org. Chem.*, 1978, **43**, 147.

116 R. H. Shapiro, *Org. React.* (*N. Y.*), 1976, **23**, 405.

117 R. W. Hoffmann and S. Dresely, *Chem. Ber.*, 1989, **122**, 903.

118 R. J. K. Taylor and G. Casy in *Organocopper Reagents—A Practical Approach*, ed. R. J. K. Taylor, OUP, Oxford, 1994, p. 39.

119 D. A. Evans, M. D. Ennis, T. Le, N. Mandel and G. Mandel, *J. Am. Chem. Soc.*, 1984, **106**, 1154.

120 D. A. Evans, M. D. Ennis and D. J. Mathre, *J. Am. Chem. Soc.*, 1982, **104**, 1737.

121 D. A. Evans and J. M. Takacs, *Tetrahedron Lett.*, 1980, **21**, 4233.

122 A. Ichihara, S. Miki, H. Kawagishi and S. Sakamura, *Tetrahedron Lett.*, 1989, **30**, 4551.

123 D. A. Evans, J. Bartroli and T. L. Shih, *J. Am. Chem. Soc.*, 1981, **103**, 2127.

124 H. Jin, J. Uenishi, W. J. Christ and Y. Kishi, *J. Am. Chem. Soc.*, 1986, **108**, 5644; D. P. Stamos, X. C. Sheng, S. S. Chen and Y. Kishi, *Tetrahedron Lett.*, 1997, **38**, 6355.

125 P. K. Freeman and L. L. Hutchinson, *J. Org. Chem.*, 1980, **45**, 1924.
